# Supplementary material
Source: PubMed Central journal article supplement (PMC5665789)
Supplement: rsfs20160099supp1.pdf [file rsfs20160099supp1.pdf]

# Redox-Sensitive Reversible Self-Assembly of Amino Acid-Naphthalene Diimide Conjugates

*Wathsala Liyanage, Paul W. Rubeo, and Bradley L. Nilsson\**

Department of Chemistry, University of Rochester, Rochester, NY, 14627-0216, USA.

E-mail: [nilsson@chem.rochester.edu](mailto:nilsson@chem.rochester.edu)

Fax: +1 585 276-0205; Tel. +1 585 276-3053

## Supporting Information

### Table of Contents

|                                                  |           |
|--------------------------------------------------|-----------|
| <b>General information</b> .....                 | <b>3</b>  |
| <b>Synthesis of compounds</b> .....              | <b>4</b>  |
| <b>Figure S1. <sup>1</sup>H NMR of 2a</b> .....  | <b>8</b>  |
| <b>Figure S2. <sup>13</sup>C NMR of 2a</b> ..... | <b>9</b>  |
| <b>Figure S3. <sup>1</sup>H NMR of 2b</b> .....  | <b>10</b> |
| <b>Figure S4. <sup>19</sup>F NMR of 2b</b> ..... | <b>11</b> |
| <b>Figure S5. <sup>1</sup>H NMR of 3a</b> .....  | <b>12</b> |
| <b>Figure S6. <sup>13</sup>C NMR of 3a</b> ..... | <b>13</b> |
| <b>Figure S7. <sup>1</sup>H NMR of 3b</b> .....  | <b>14</b> |
| <b>Figure S8. <sup>13</sup>C NMR of 3b</b> ..... | <b>15</b> |
| <b>Figure S9. <sup>19</sup>F NMR of 3b</b> ..... | <b>16</b> |
| <b>Figure S10. <sup>1</sup>H NMR of 1a</b> ..... | <b>17</b> |

|                                                              |           |
|--------------------------------------------------------------|-----------|
| <b>Figure S11. <math>^{13}\text{C}</math> NMR of 1a.....</b> | <b>18</b> |
| <b>Figure S12. <math>^1\text{H}</math> NMR of 1b.....</b>    | <b>19</b> |
| <b>Figure S13. <math>^{13}\text{C}</math> NMR of 1b.....</b> | <b>20</b> |
| <b>Figure S14. <math>^{19}\text{F}</math> NMR of 1b.....</b> | <b>21</b> |
| <b>Figure S15 .....</b>                                      | <b>22</b> |
| <b>Figure S16 .....</b>                                      | <b>23</b> |
| <b>Figure S17 .....</b>                                      | <b>24</b> |
| <b>Table S1.....</b>                                         | <b>25</b> |
| <b>Typical EPR measurement parameters .....</b>              | <b>26</b> |
| <b>Figure S18 .....</b>                                      | <b>27</b> |
| <b>Table S2.....</b>                                         | <b>27</b> |
| <b>Quantum yield calculation .....</b>                       | <b>28</b> |
| <b>Single crystal X-ray structure for 3a.....</b>            | <b>29</b> |
| <b>Single crystal X-ray structure for 3b.....</b>            | <b>29</b> |
| <b>Structure solution and refinement for 3a and 3b .....</b> | <b>30</b> |
| <b>Figure S19 .....</b>                                      | <b>31</b> |
| <b>Figure S20 .....</b>                                      | <b>31</b> |
| <b>Figure S21 .....</b>                                      | <b>32</b> |
| <b>Appendix 1 .....</b>                                      | <b>33</b> |
| <b>Appendix 2 .....</b>                                      | <b>53</b> |
| <b>Appendix 3 .....</b>                                      | <b>71</b> |

## General information

Unless stated otherwise, reactions were performed in flame-dried glassware under a positive pressure of nitrogen using dry solvents. Commercial grade solvents were used without further purification except where noted. Diethyl ether (Et<sub>2</sub>O), dichloromethane (DCM), dimethylformamide (DMF), acetonitrile (ACN) and tetrahydrofuran (THF) were purified as described in: Pangborn, A. B.; Giardello, M. A.; Grubbs, R. H.; Rosen, R. K.; Timmers, F. J. *Organometallics* **1996**, *15*, 1518–1520. Reagents were purchased at highest available commercial quality and used without further purification unless otherwise stated. Thin-layer chromatography (TLC) was performed using silica gel 60 F254 pre-coated plates (0.25 mm). Flash chromatography was performed using silica gel (40 μm particle size). The purity of compounds was judged by TLC analysis (single spot/two solvent systems) using a UV lamp, ninhydrin, or basic KMnO<sub>4</sub> stain. NMR spectra were recorded on a Bruker Avance-400 MHz and 500 MHz spectrometers. NMR chemical shifts were reported as  $\delta$  values relative to residual signals from deuterated solvents (CDCl<sub>3</sub> or DMSO-*d*<sub>6</sub>). Water for the self-assembly experiments was purified with a Barnstead NANO pure system (0.2 μm filter, 18 Ω).

## Synthesis of compounds

### Compound 3a

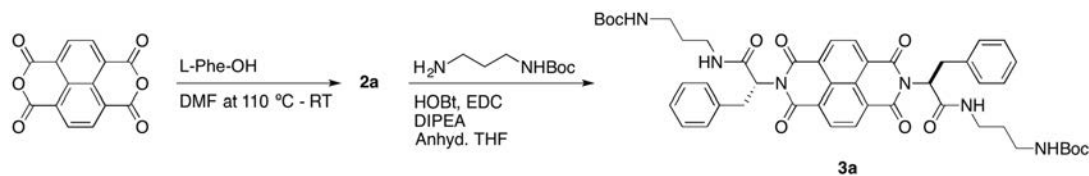

A solution of 1, 4, 5, 8-naphthalenetetracarboxylic dianhydride (500 mg, 1.86 mmol) in dry DMF (10 mL) was treated with L-Phe-OH (616 mg, 3.73 mmol). The reaction was warmed to completely dissolve the substrate and the reaction mixture was stirred overnight at room temperature. The resulting crude product was poured into ice water and acidified to pH~3 and the resulting product **2a** was obtained by filtration.  $^1\text{H}$  NMR: (500 MHz, DMSO- $d_6$ ): 13.11 (s, 2H), 8.70 (s, 4H), 7.15 (m, 10 H), 5.90 (m, 2H), 3.62 (dd,  $J = 7$  Hz, 14 Hz, 2H), 3.36 (dd,  $J = 7$  Hz, 22 Hz, 2H) ppm;  $^{13}\text{C}$  NMR (125 MHz, DMSO- $d_6$ )  $\delta$  170.72, 162.49, 138.28, 131.71, 129.39, 128.63, 126.82, 126.51, 126.13, 55.10, 34.83; HRMS (ESI-TOF) ( $m/z$ )  $[\text{M}+\text{Na}]^+$  calcd for  $\text{C}_{32}\text{H}_{23}\text{N}_2\text{O}_8$  585.1274, found 585.1277.

Crude **2a** (400 mg, 0.70 mmol) was taken up directly in anhydrous THF and stirred at 0 °C; 1-ethyl-3-(3-dimethylaminopropyl)carbodiimide hydrochloride (EDC•HCl) (268 mg, 1.40 mmol) and *N*-hydroxybenzotriazole HOBt (228 mg, 1.7 mmol) were then added. The reaction was stirred 2 h at 0 °C, then treated with 280  $\mu\text{L}$  of *N,N*-diisopropylethylamine (DIPEA) and tert-butyl(3-aminopropyl)carbamate (244 mg, 1.40 mmol). The resulting reaction mixture was allowed to warm to room temperature and stirred for 3 h. The crude reaction was concentrated under reduced pressure and purified by flash chromatography (50% EtOAc/hexanes eluant) to obtain a **3a** as a pale yellow powder (143 mg, 23% yield).  $^1\text{H}$  NMR: (500 MHz, DMSO- $d_6$ ): 8.60 (s, 4H), 7.52 (2H), 7.10 (m, 10H), 6.03 (t,  $J = 2$  Hz), 4.84 (m, 2H), 3.81 (dd,  $J = 2$  Hz), 3.61 (dd,  $J =$

2H), 3.40 (m, 2H), 3.10 (m, 6H), 1.63 (2H), ppm;  $^{13}\text{C}$  NMR (125 MHz,  $\text{DMSO-}d_6$ ):  $\delta$  168.59, 163.05, 157.17, 137.64, 130.82, 129.04, 128.53, 126.92, 126.72, 79.50, 56.22, 36.46, 35.05, 34.10, 29.55, 27.72 ppm; HRMS (ESI-TOF) ( $m/z$ )  $[\text{M}+\text{Na}]^+$  calcd for  $\text{C}_{48}\text{H}_{55}\text{N}_6\text{O}_{10}$  897.3799, found 897.3795.

### Compound 3b

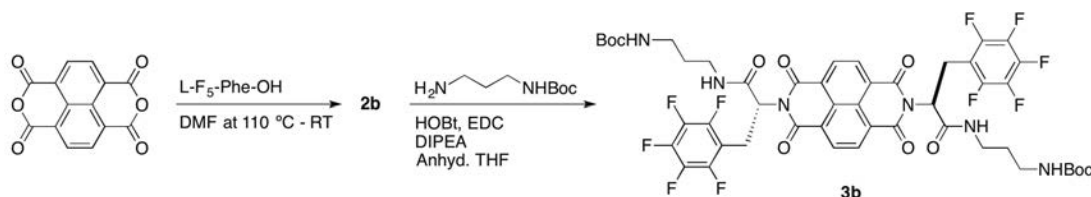

Compound **3b** was prepared by the same procedure described for **3a**, with L-F<sub>5</sub>-Phe-OH (0.5741 g, 2.25 mmol) in place of L-Phe-OH. Compound **2b** was obtained as a brown powder (435 mg, 78%).  $^1\text{H}$  NMR: (500 MHz,  $\text{DMSO-}d_6$ ): 13.41 (s, 2H), 8.77 (s, 4H), 5.87 (2H), 3.74 (2H), 3.56 (2H) ppm;  $^{13}\text{C}$  NMR (125 MHz,  $\text{DMSO-}d_6$ ):  $\delta$  169.64, 162.64, 146.60, 144.20, 138.62, 136.09, 131.91, 126.20, 111.94, 52.49, 22.55 ppm.  $^{19}\text{F}$  NMR (376 MHz,  $\text{DMSO-}d_6$ )  $\delta$  -80.34 (m, 2F), -93.42 (t,  $J = 18$  Hz, 1F), -99.28 (m, 2F). HRMS (ESI-TOF) ( $m/z$ )  $[\text{M}+\text{Na}^+]$  calcd for  $\text{C}_{32}\text{H}_{13}\text{F}_{10}\text{N}_2\text{O}_8$  765.0332 found 765.0315.

Crude **2b** (220 mg, 0.30 mmol) was taken up directly in anhydrous THF and stirred at 0 °C; 1-ethyl-3-(3-dimethylaminopropyl)carbodiimide hydrochloride ( $\text{EDC}\cdot\text{HCl}$ ) (50 mg, 0.26 mmol) and *N*-hydroxybenzotriazole (HOBt) (43 mg, 0.31 mmol) were then added. The reaction was stirred 2 h at 0 °C, then treated with 54  $\mu\text{L}$  of *N,N*-diisopropylethylamine (DIPEA) and tert-butyl(3-aminopropyl)carbamate (45 mg, 0.26 mmol). The resulting reaction mixture was allowed to warm to room temperature and stirred for 3 h. The crude reaction was concentrated under reduced pressure and purified by flash chromatography (50% EtOAc/hexanes eluant) to obtain a

**3b** as a yellow powder (180 mg, 57%)  $^1\text{H}$  NMR: (500 MHz,  $\text{DMSO-}d_6$ ): 8.66 (s, 4H), 7.59 (s, 2H), 5.85 (2H), 4.51 (m, 2H), 3.93 (dd,  $J = 2\text{H}$ ), 3.70 (dd,  $J = 2\text{H}$ ), 3.48(m, 2H), 3.00 (m, 6H), 1.64 (m, 2H), 1.45 (m, 2H), 0.72 (s, 18H) ppm;  $^{13}\text{C}$  NMR (125 MHz,  $\text{DMSO-}d_6$ ):  $\delta$  167.15, 163.03, 157.44, 146.76, 144.81, 138.57, 136.540, 136.30, 131.23, 127.00, 112.04, 79.50, 54.54, 36.40, 34.92, 29.42, 27.47, 21.49 ppm; HRMS (ESI-TOF) ( $m/z$ )  $[\text{M}+\text{Na}]^+$  calcd. for  $\text{C}_{48}\text{H}_{45}\text{F}_{10}\text{N}_6\text{O}_{10}\text{Na}$  1077.2857 found 1077.2897.

### Compound 1a

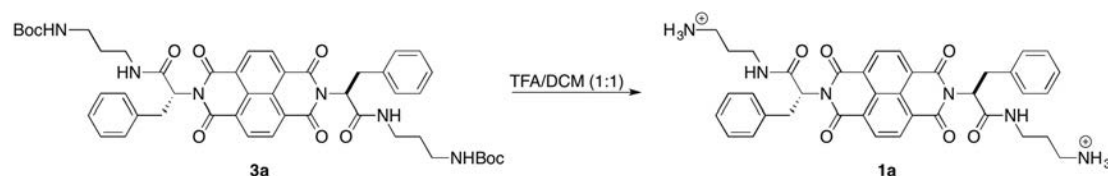

A solution of **3a** (143 mg, 0.16 mmol) in 50% TFA/DCM solution was stirred at room temperature for 12 h. The reaction mixture was diluted with 5 mL of ethyl acetate, and concentrated in vacuo (this step is necessary to remove excess TFA). The crude residue was treated with  $\text{Et}_2\text{O}$  (precooled to  $0\text{ }^\circ\text{C}$ ) and the resulting precipitate was obtained by filtration, and then dried under vacuum. The desired product **1a** was obtained as a pale yellow powder (111 mg, 77%).  $^1\text{H}$  NMR: (500 MHz,  $\text{DMSO-}d_6$ ): 8.55 (s, 4H), 8.15 (s, 2H), 7.70 (s, 6H), 6.99 (m, 10H), 5.73 (t,  $J = 14\text{ Hz}$ , 4H), 3.60 (t,  $J = 10\text{ Hz}$ , 2H), 3.26 (m, 2H), 3.21 (m, 2H), 3.14 (m, 2H), 2.74 (m, 4H), 1.62 (s, 4H) ppm;  $^{13}\text{C}$  NMR (125 MHz,  $\text{DMSO-}d_6$ ):  $\delta$  169.08, 162.90, 138.41, 130.97, 129.35, 128.58, 126.72, 126.63, 126.40, 55.79, 37.14, 36.34, 34.21, 27.89 ppm; HRMS (ESI-TOF) ( $m/z$ )  $[\text{MH}]^+$  calcd for  $\text{C}_{38}\text{H}_{38}\text{N}_6\text{O}_6$  675.2931 found 675.2931.

## Compound 1b

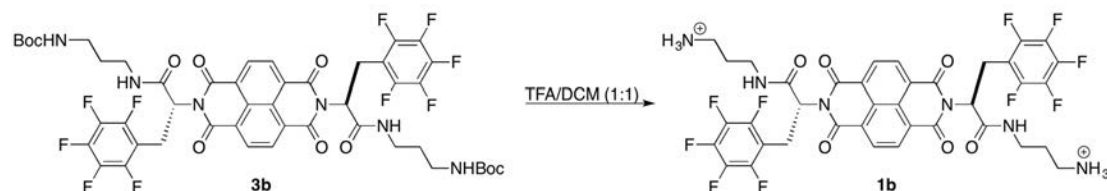

Compound **3b** (177 mg, 0.17 mmol) was deprotected using the same procedure described for **3a**.

The desired product **1b** (161 mg, 88%) was obtained as a pale yellow solid.  $^1\text{H}$  NMR: (500 MHz, DMSO- $d_6$ ): 8.72 (s, 4H), 8.35 (s, 2H), 7.72 (s, 6H), 5.74-5.71 (J= 2H), 3.81-3.78 (J= 2H), 3.51-3.46 (J= 2H), 3.24-3.20 (J =, 4H), 2.80-2.79 (J =, 4H), 1.68-1.67(4H) ppm;  $^{13}\text{C}$  NMR (125 MHz, DMSO- $d_6$ ):

$\delta$  170.65, 169.92, 167.73, 162.92, 158.90, 158.66, 158.17, 146.52, 144.49, 140.56, 138.00, 135.86, 131.31, 126.16, 118.52, 116.20, 112.78, 112.60, 112.36, 97.00 ppm;  $^{19}\text{F}$  NMR (376 MHz, DMSO- $d_6$ )  $\delta$  -80.85 (m, 2F), -93.13 (t, J = 22 Hz, 1F), -100.63(m, 2F). HRMS (ESI-TOF) ( $m/z$ )  $[\text{MH}]^+$  calcd. for  $\text{C}_{38}\text{H}_{29}\text{F}_{10}\text{N}_6\text{O}_6$  855.1983 found 855.2000.

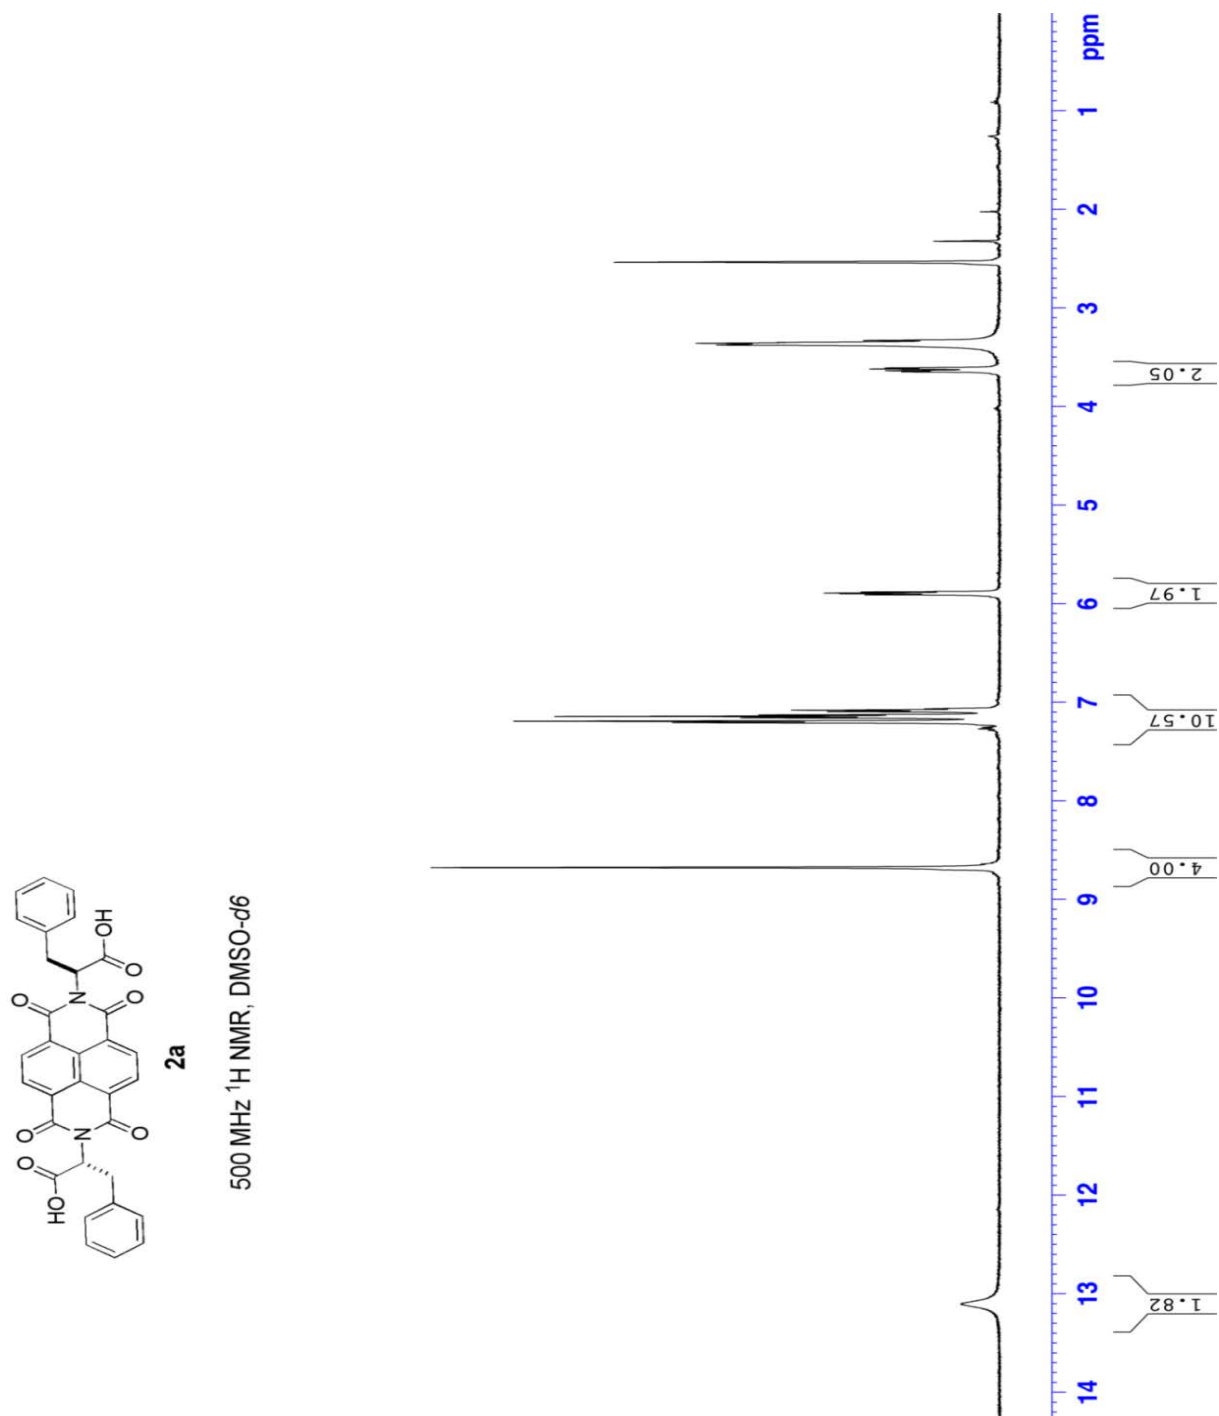

**Figure S1.**  $^1\text{H}$  NMR of **2a**.



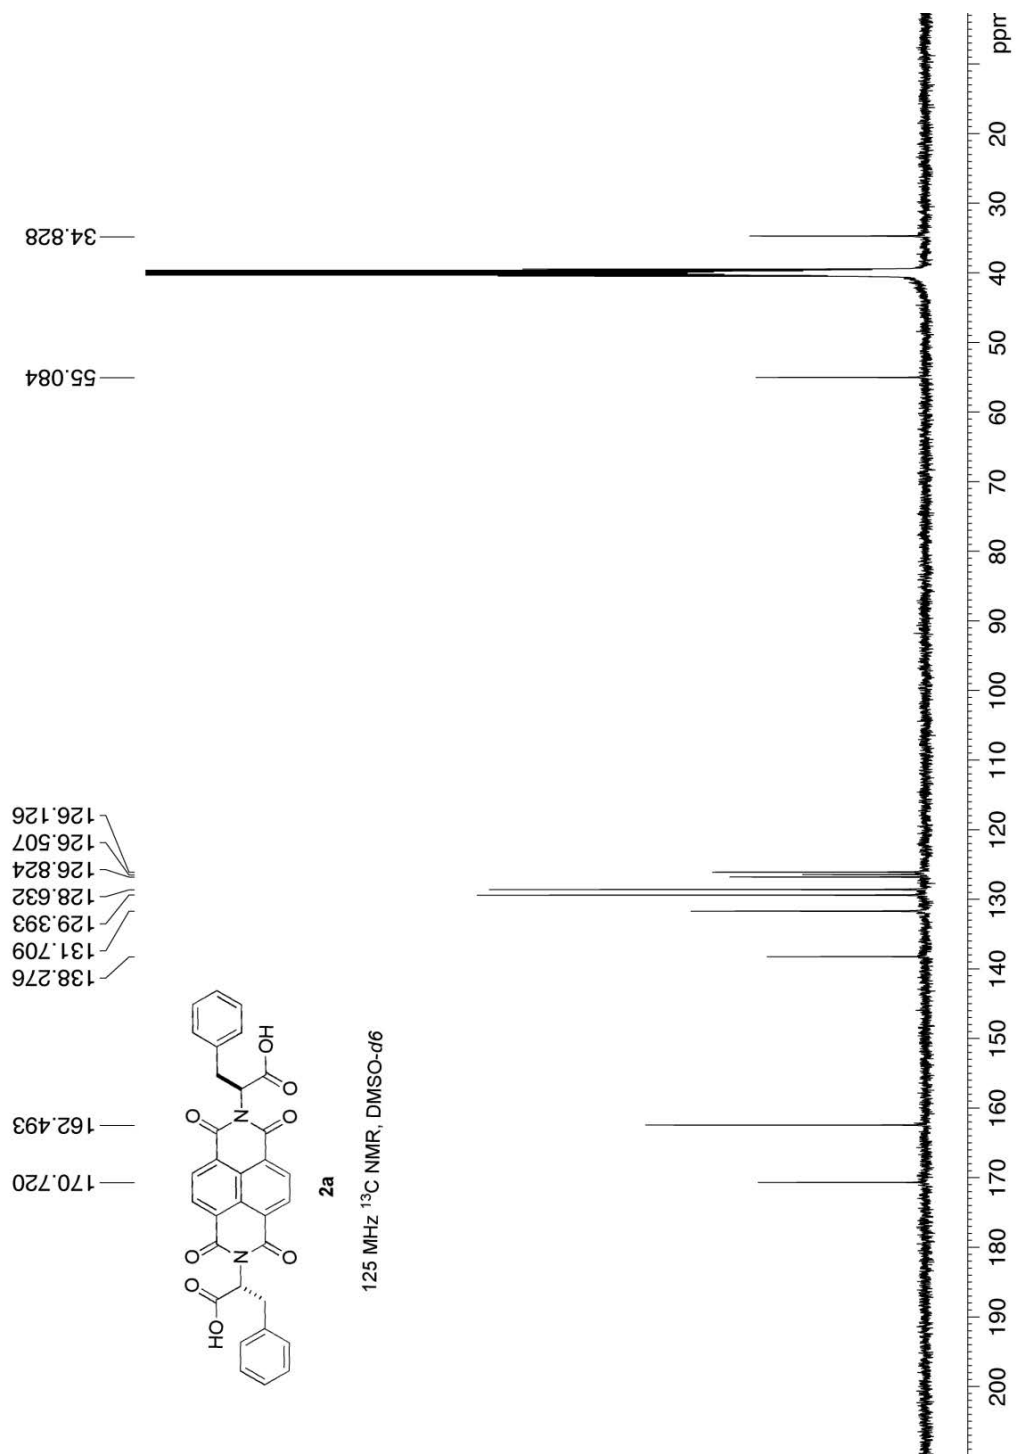

Figure S2.  $^{13}\text{C}$  NMR of **2a**.

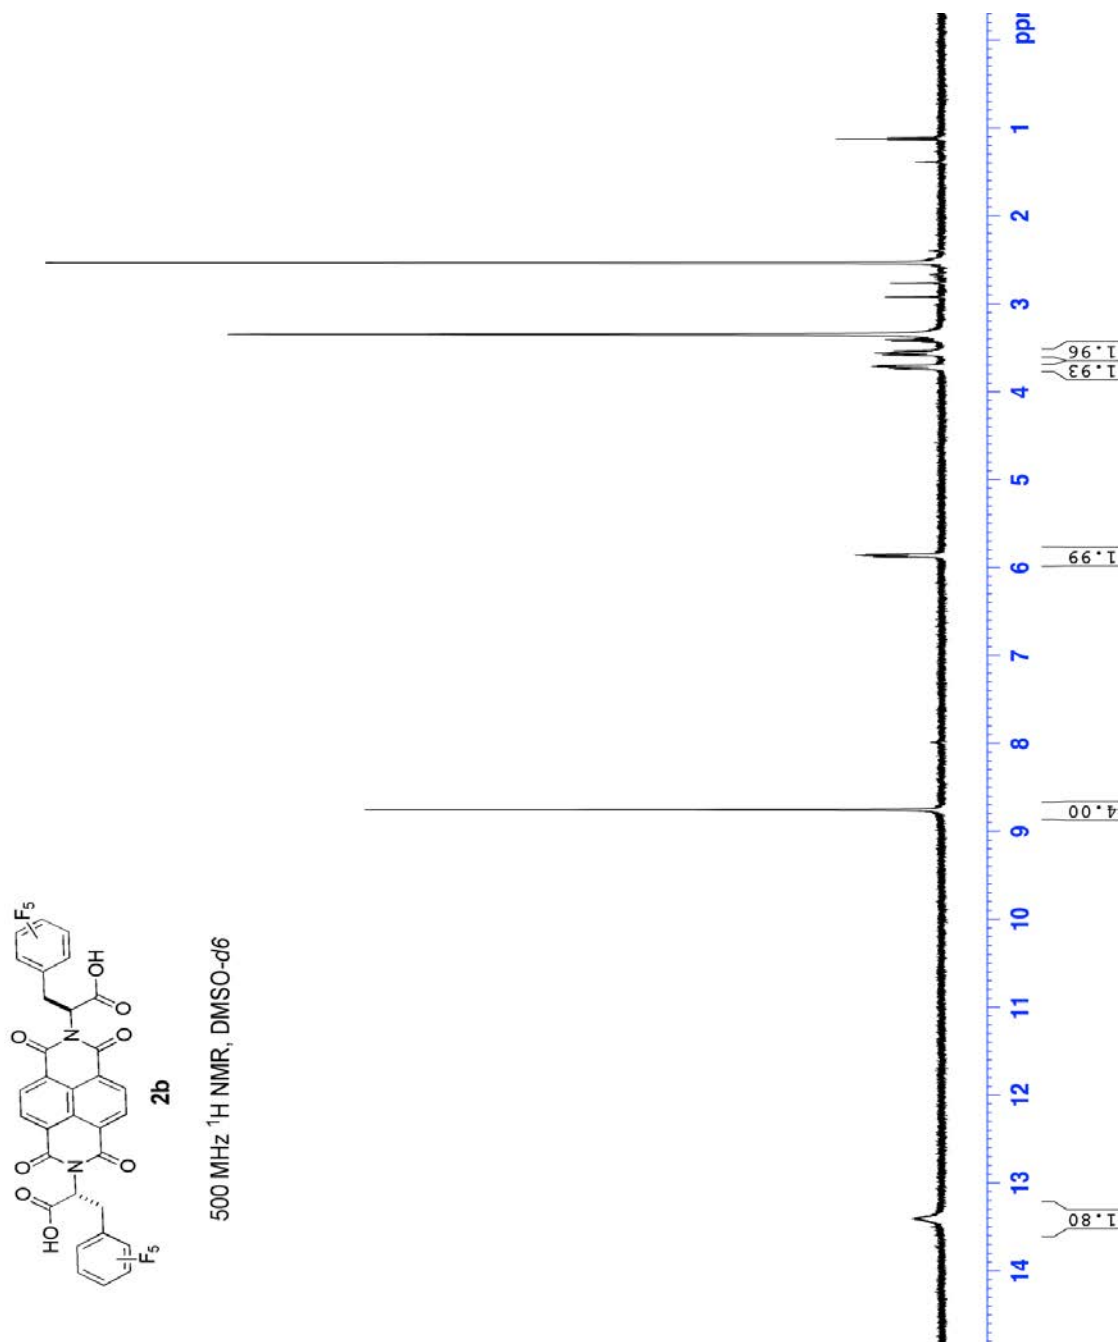

Figure S3.  $^1\text{H}$  NMR of **2b**.

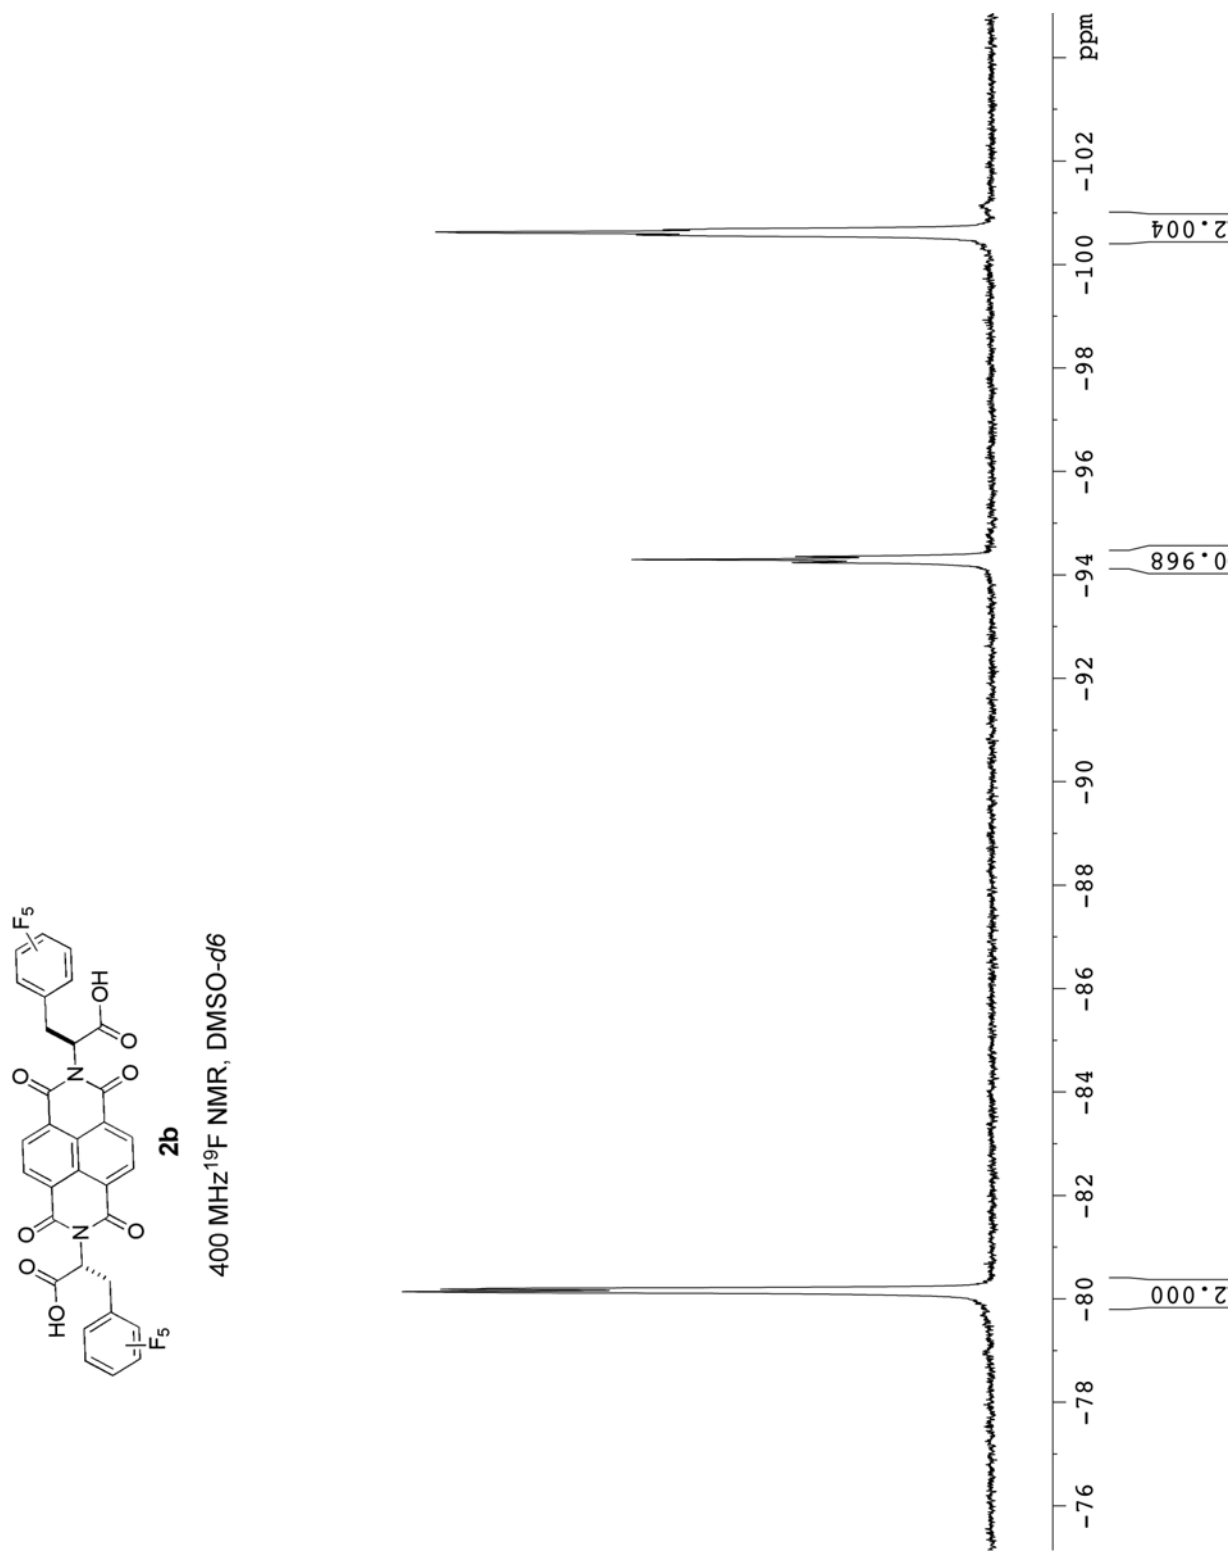

Figure S4.  $^{19}\text{F}$  NMR of **2b**.

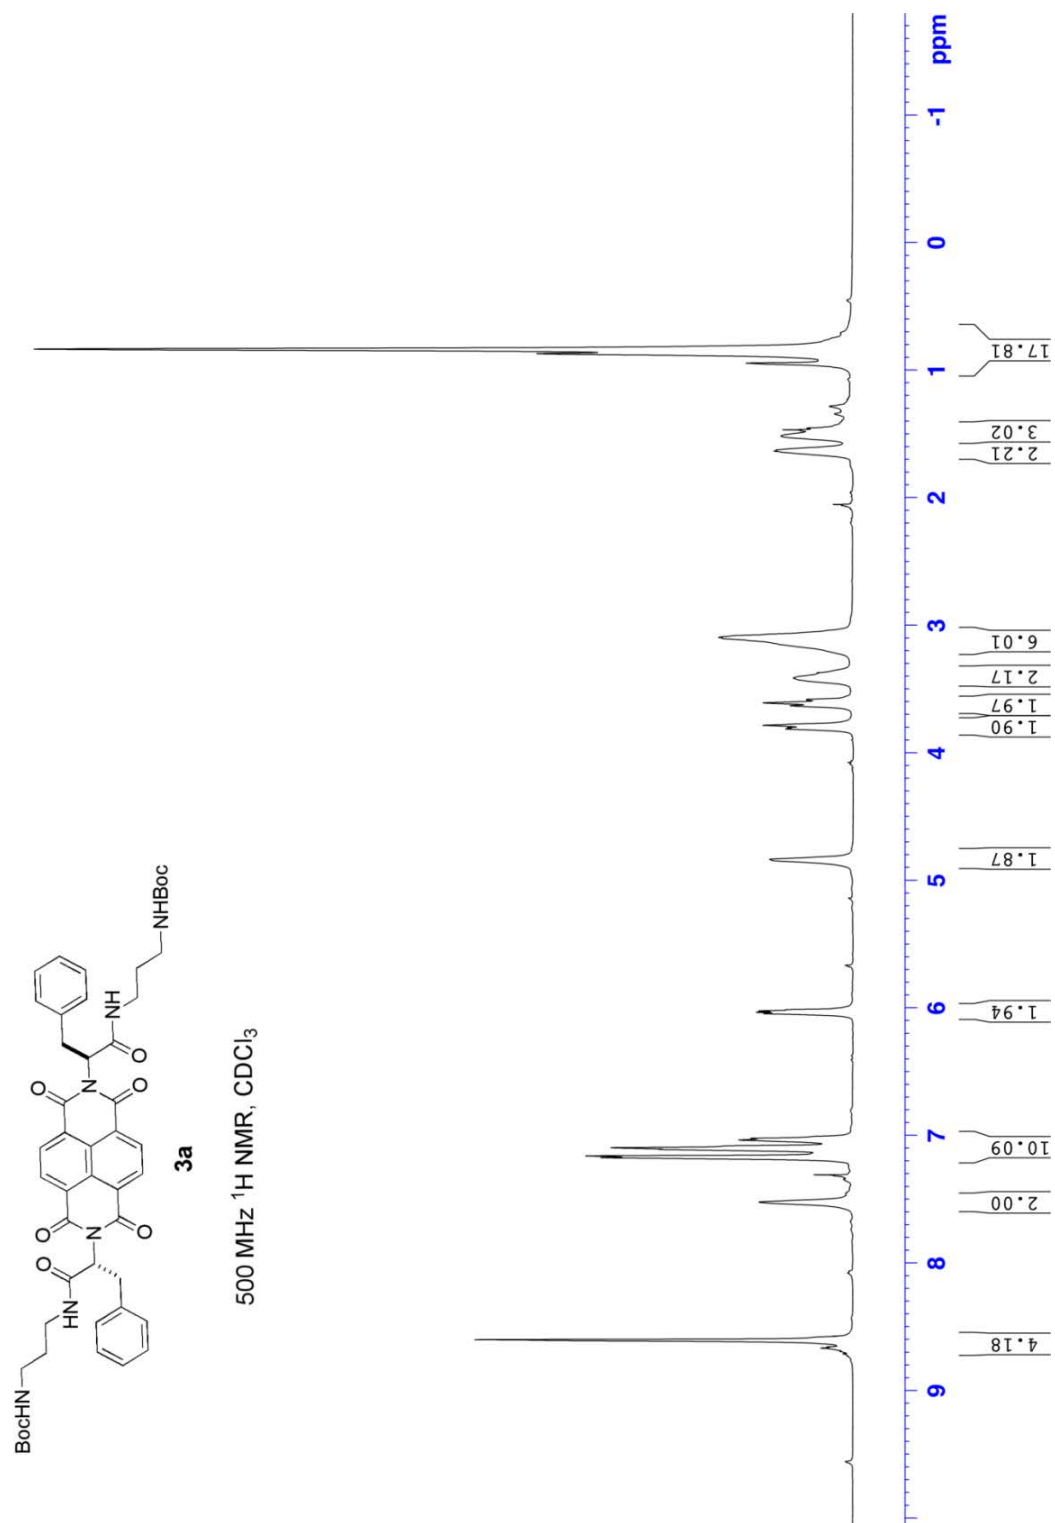

**Figure S5.**  $^1\text{H}$  NMR of **3a**.

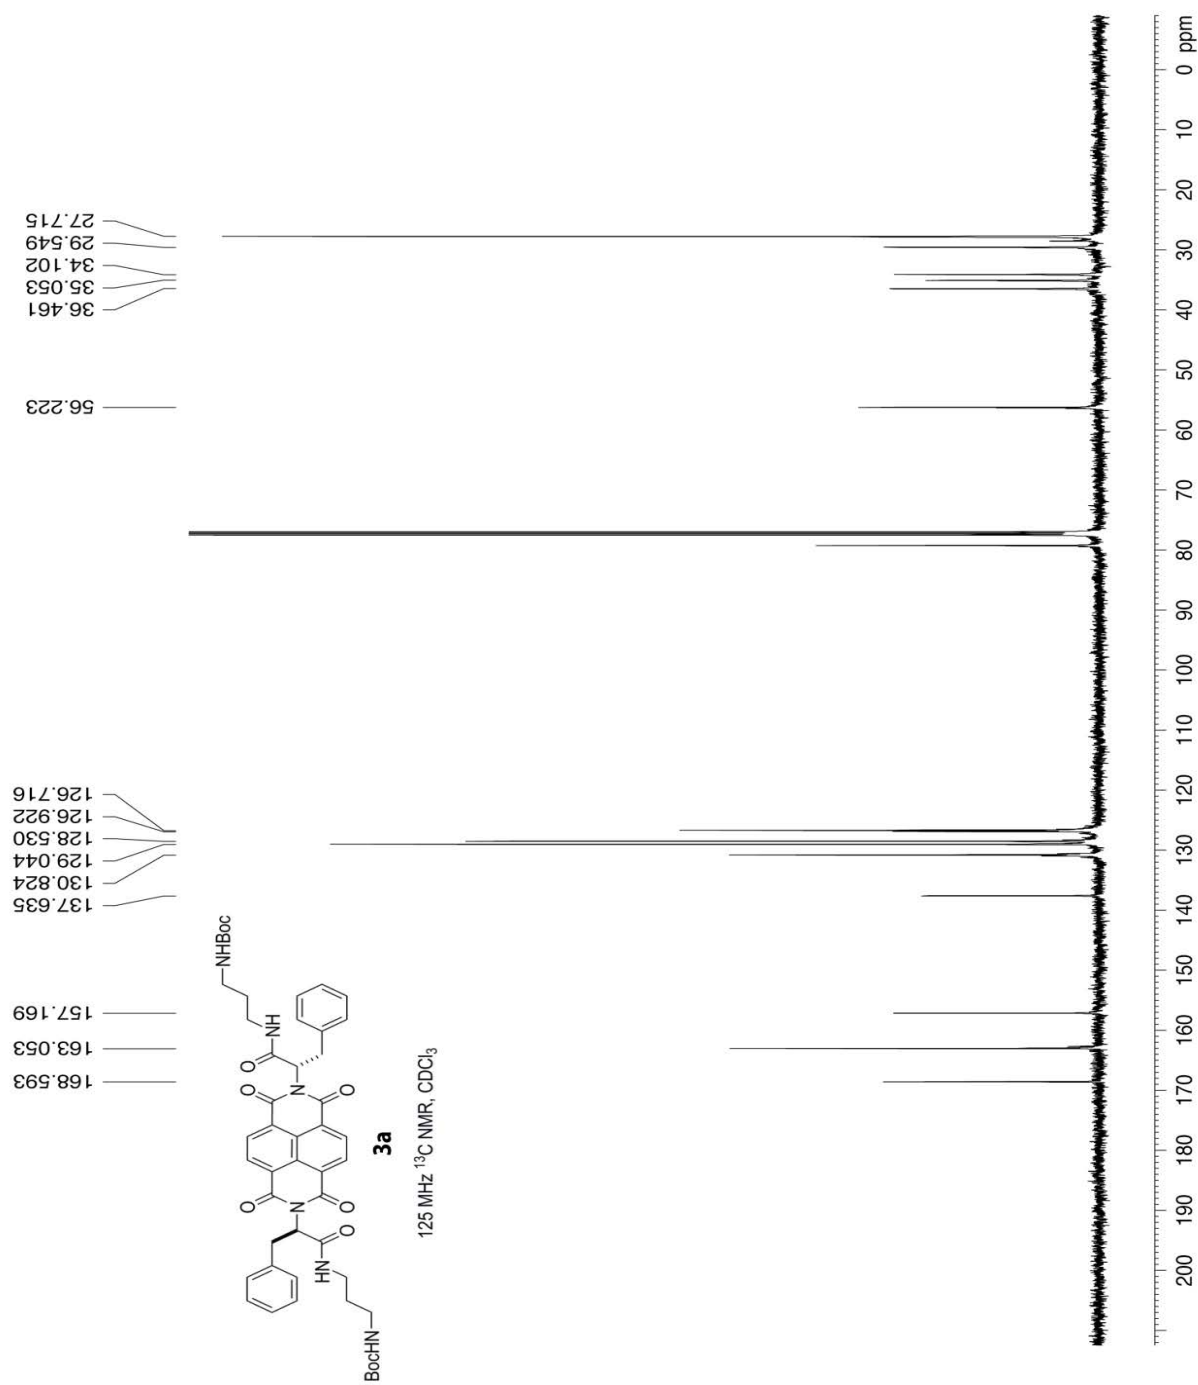

Figure S6. <sup>13</sup>C NMR of **3a**.

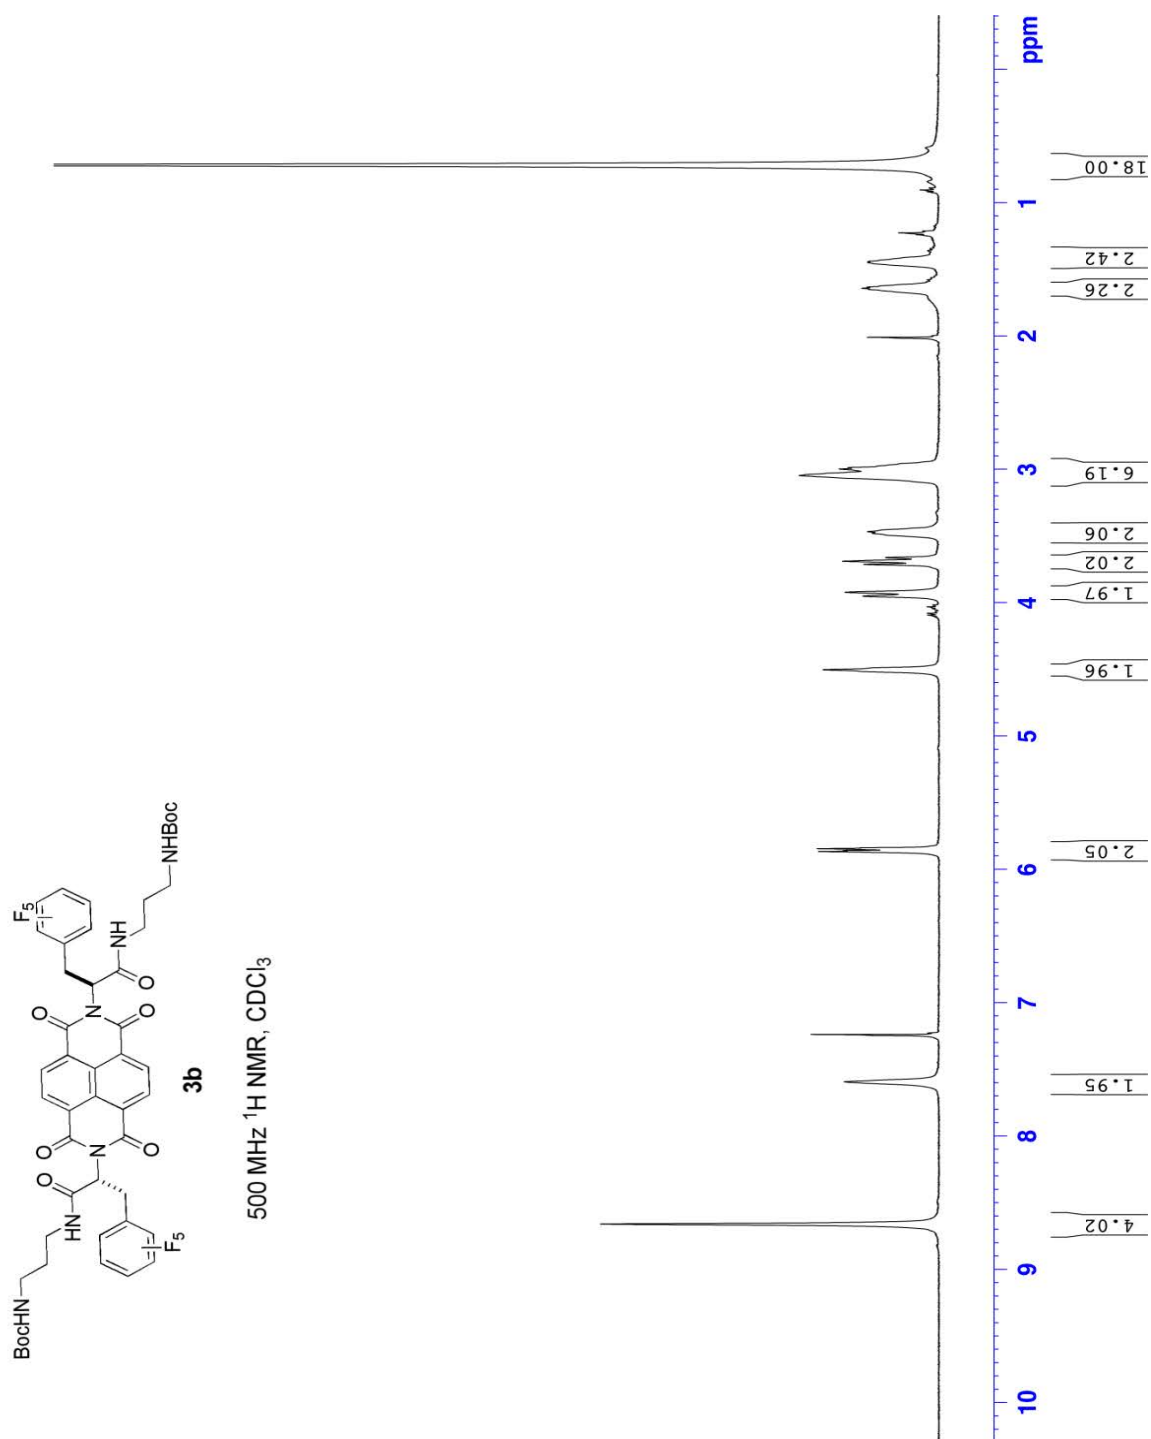

Figure S7.  $^1\text{H}$  NMR of **3b**.

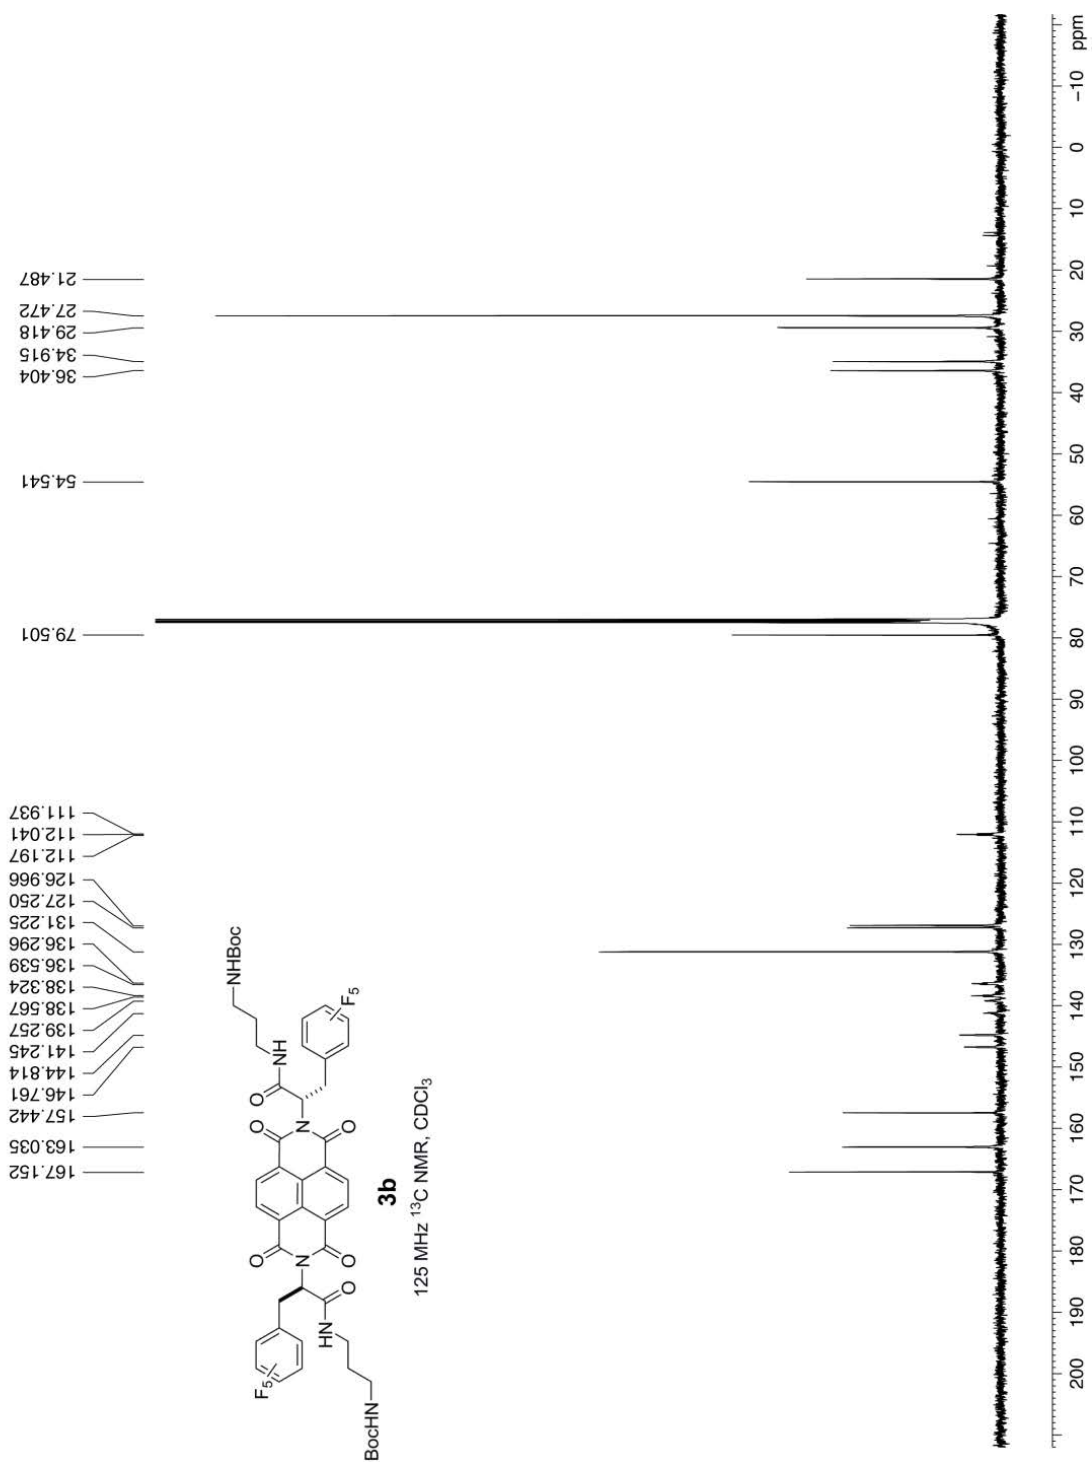

Figure S8.  $^{13}\text{C}$  NMR of **3b**.

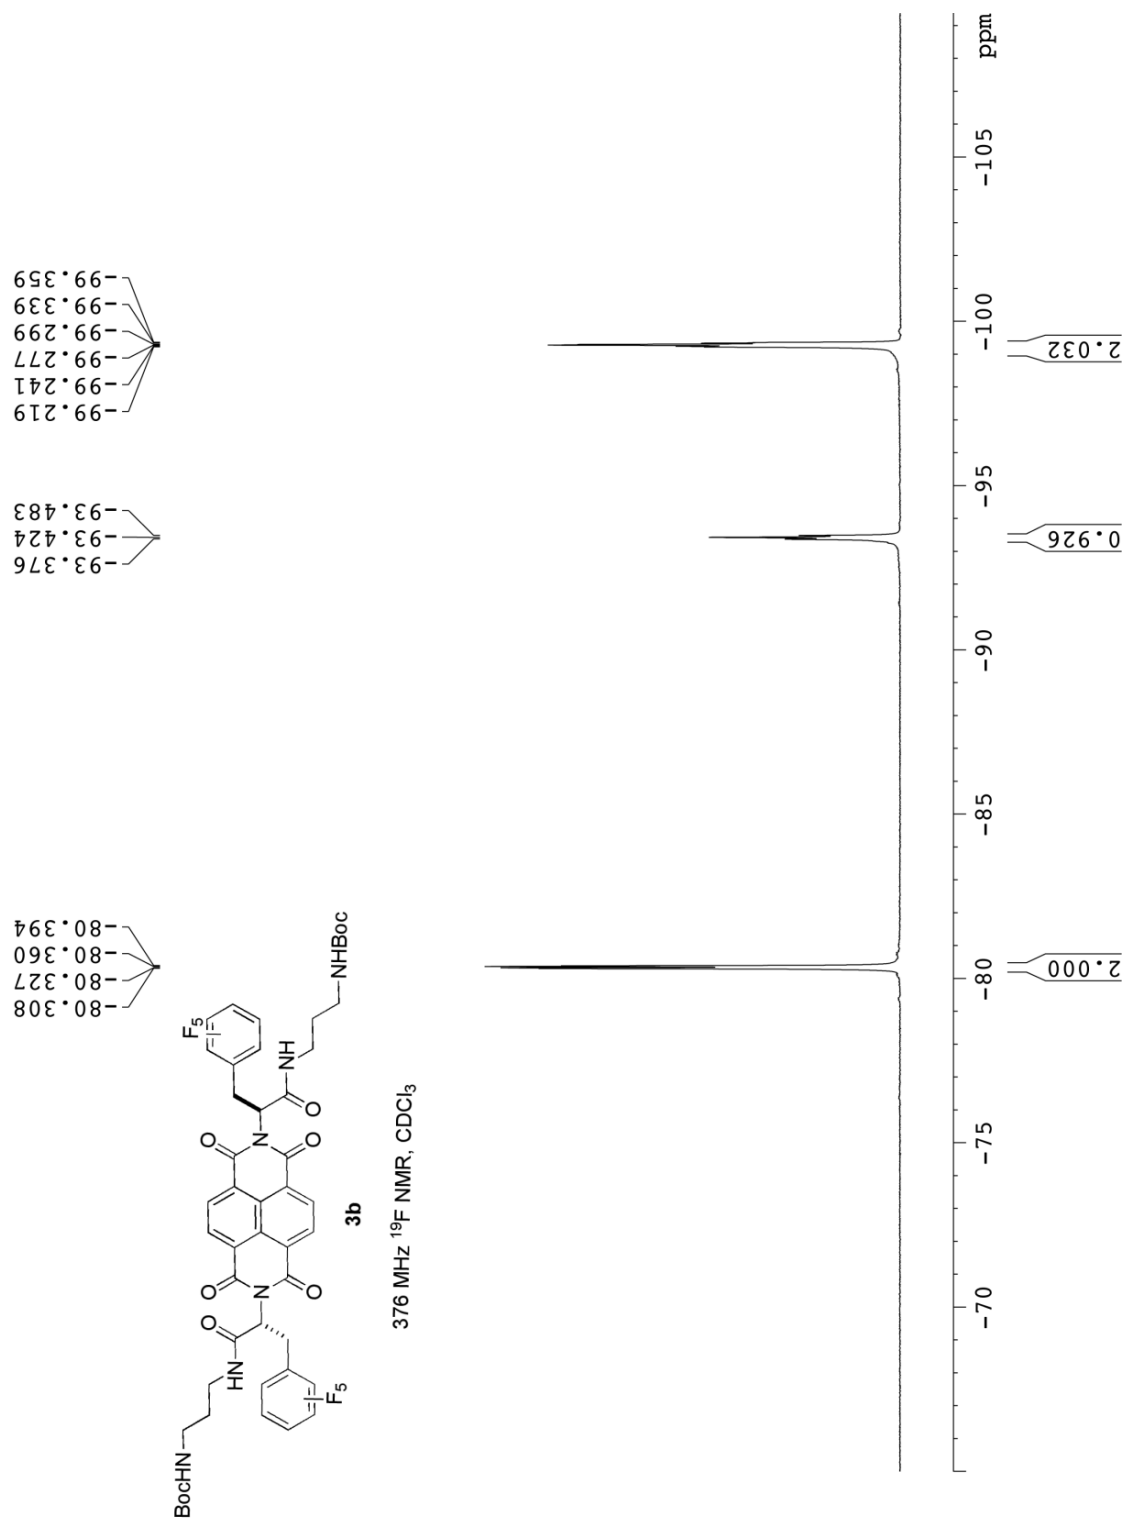

**Figure S9.**  $^{19}\text{F}$  NMR of **3b**.



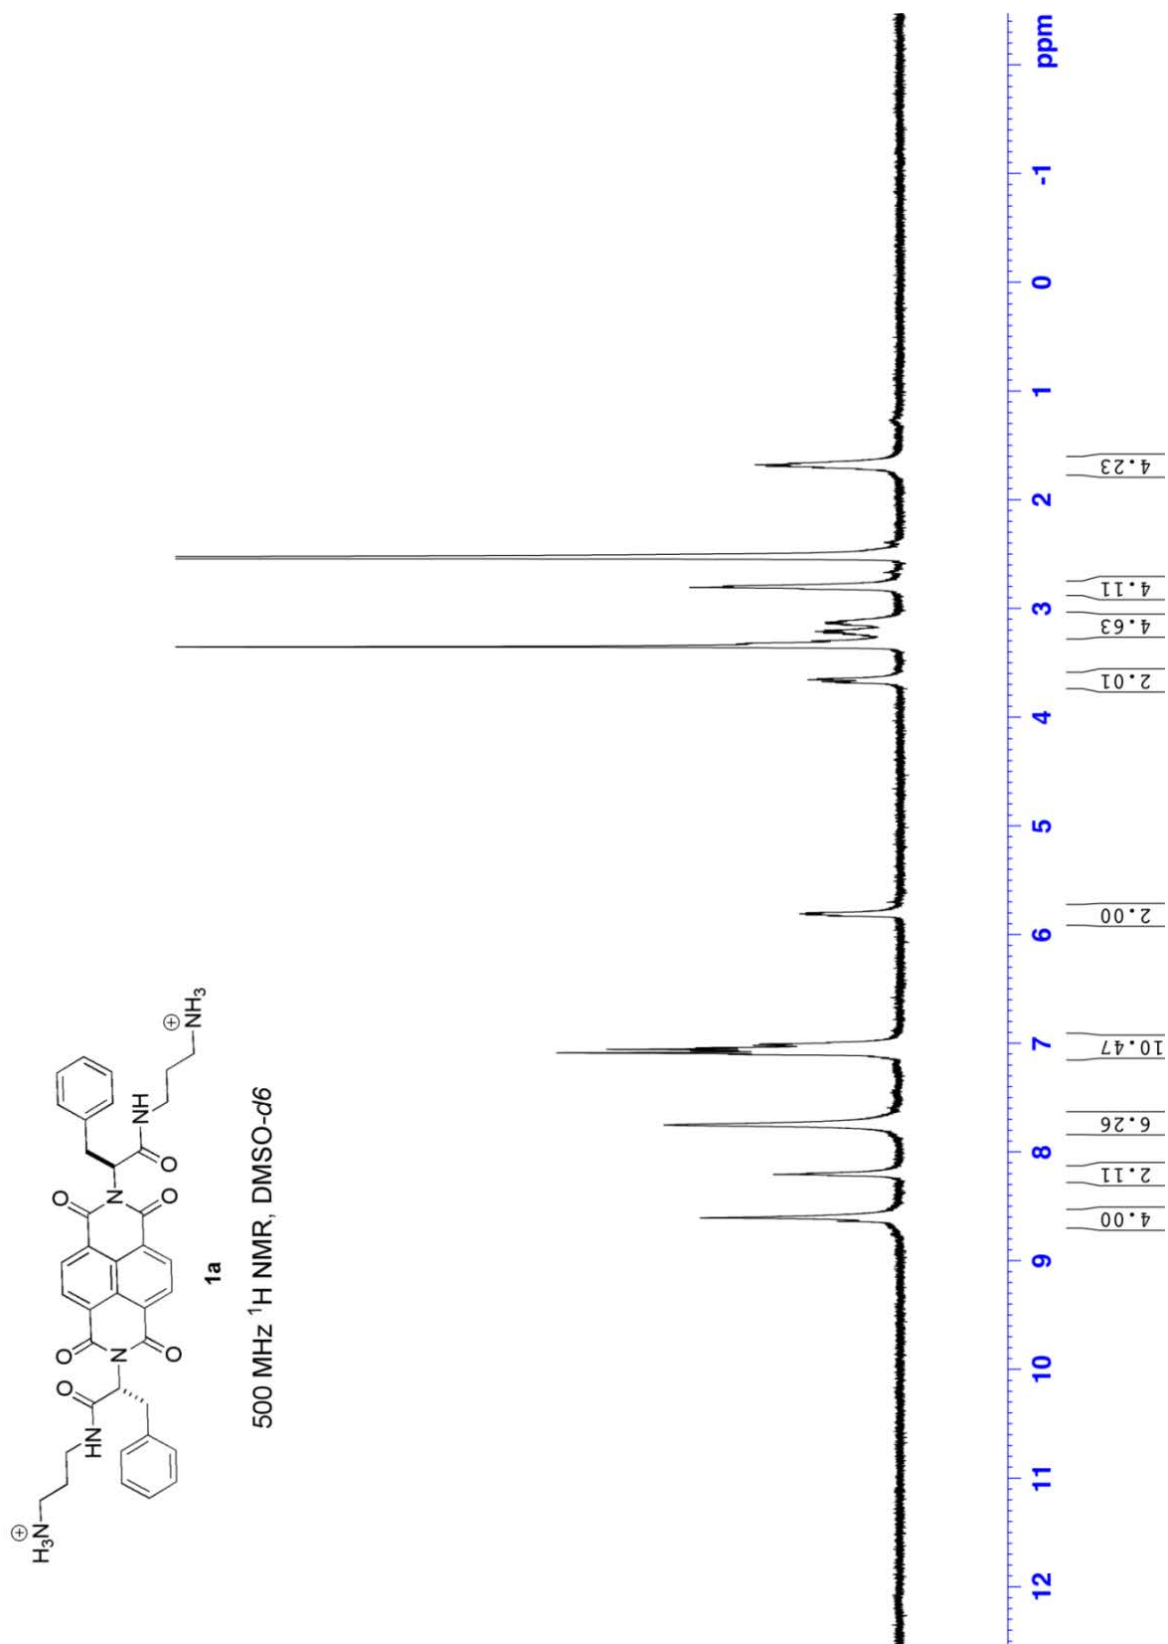

Figure S10.  $^1\text{H}$  NMR of 1a.

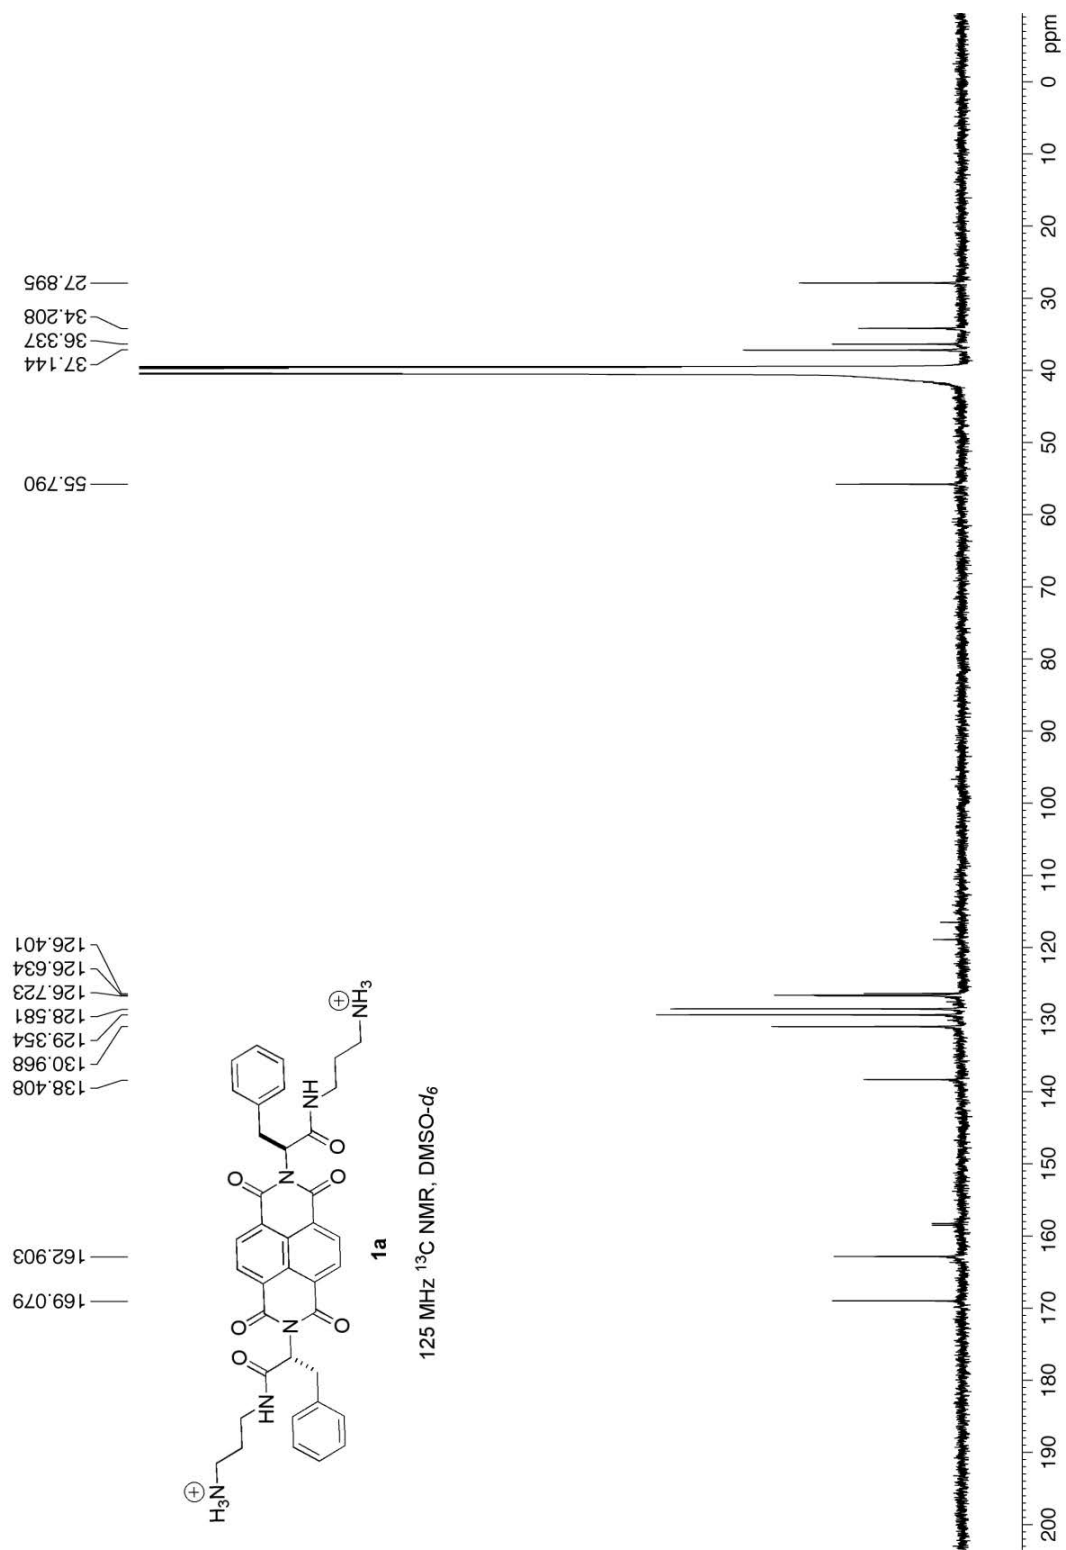Figure S11.  $^{13}\text{C}$  NMR of **1a**.

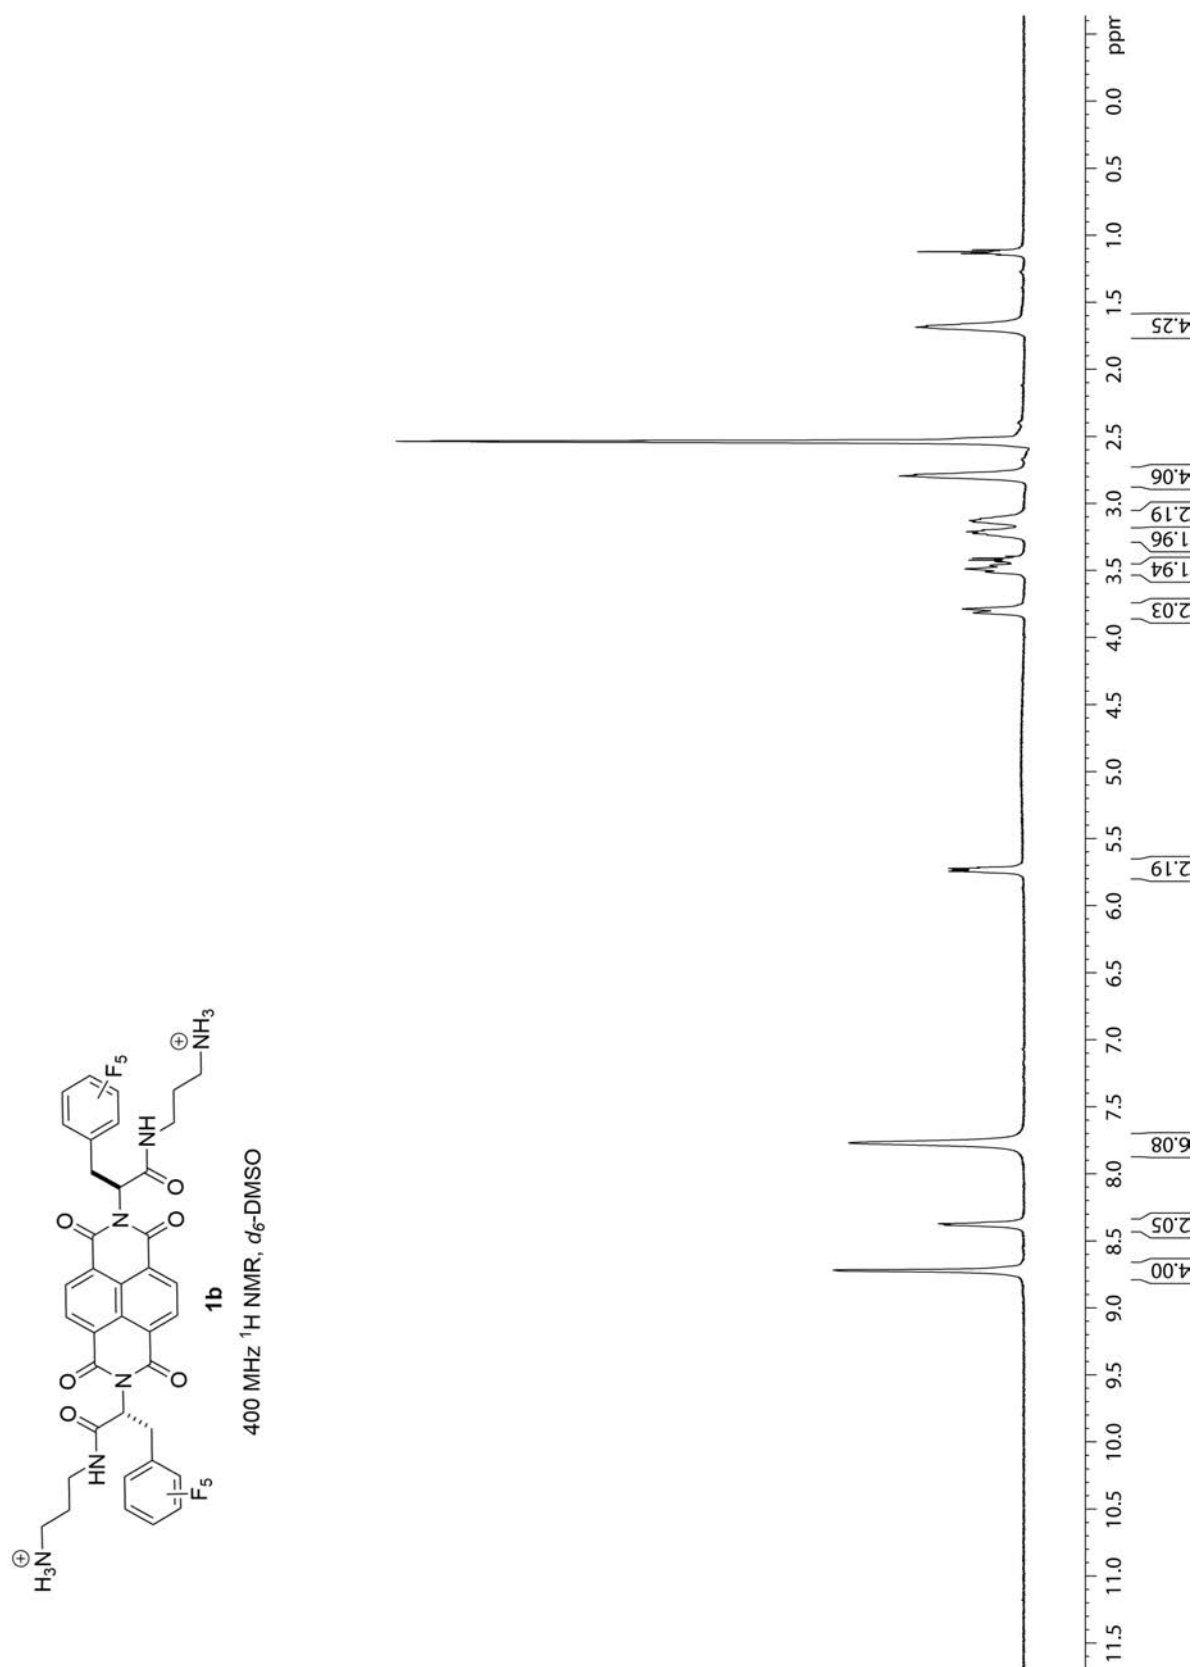

Figure S12.  $^1\text{H}$  NMR of **1b**.

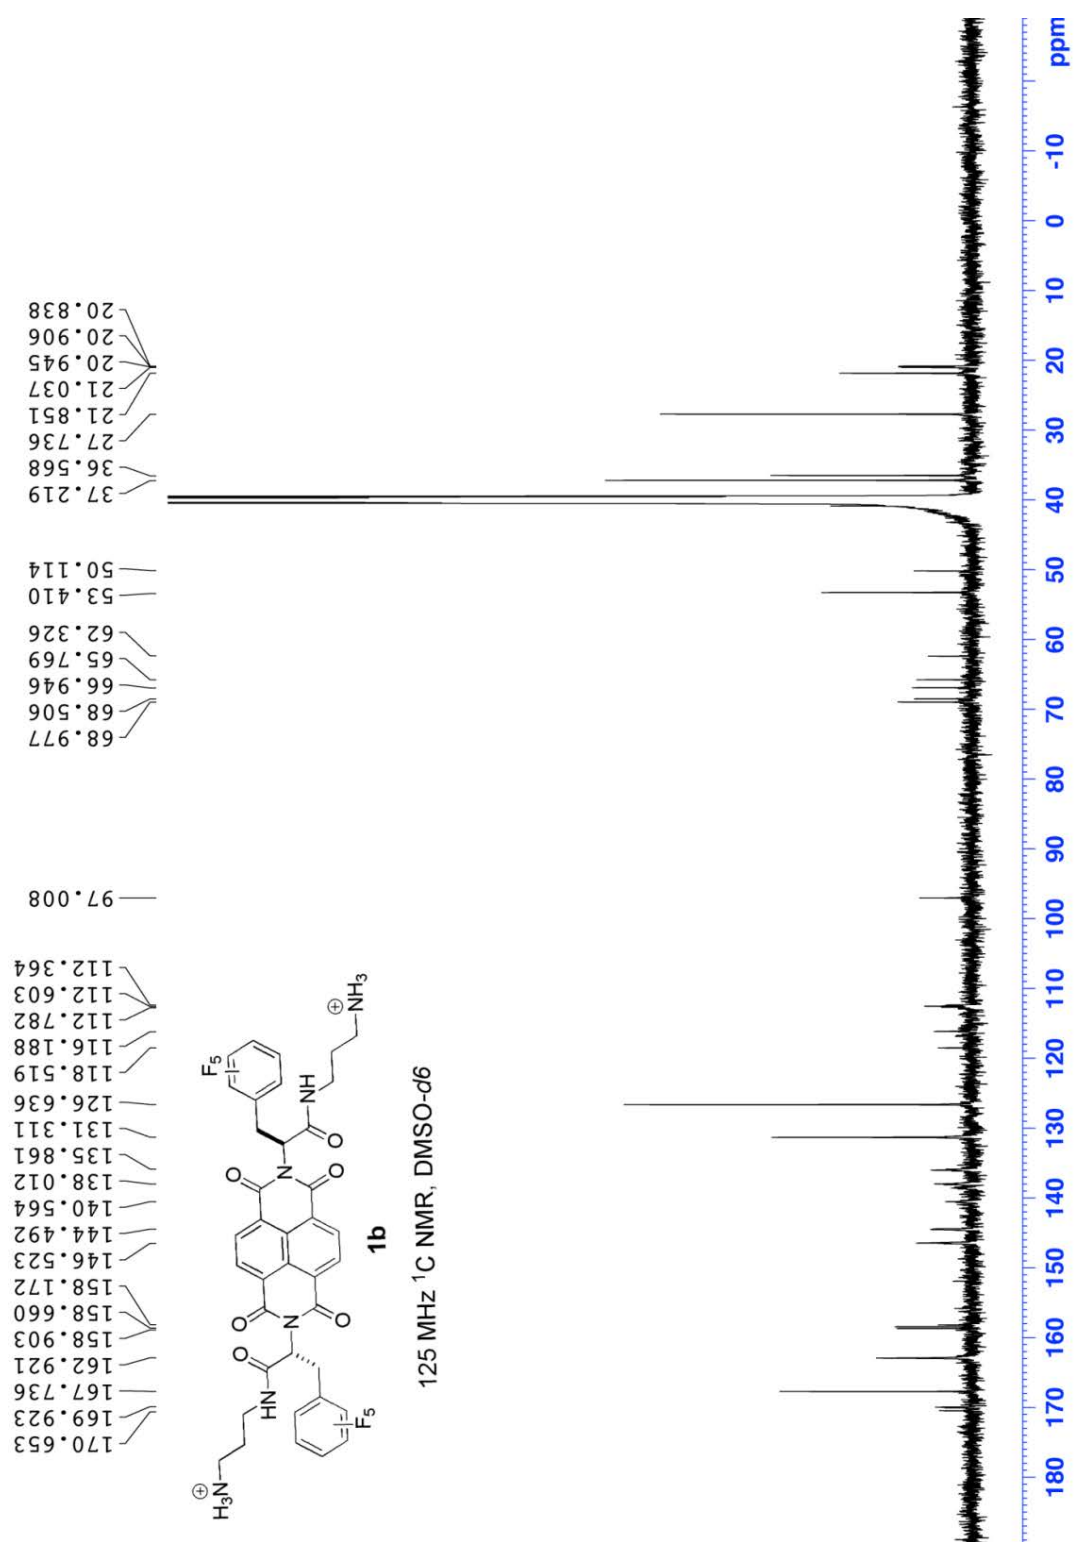

Figure S13.  $^{13}\text{C}$  NMR of **1b**.

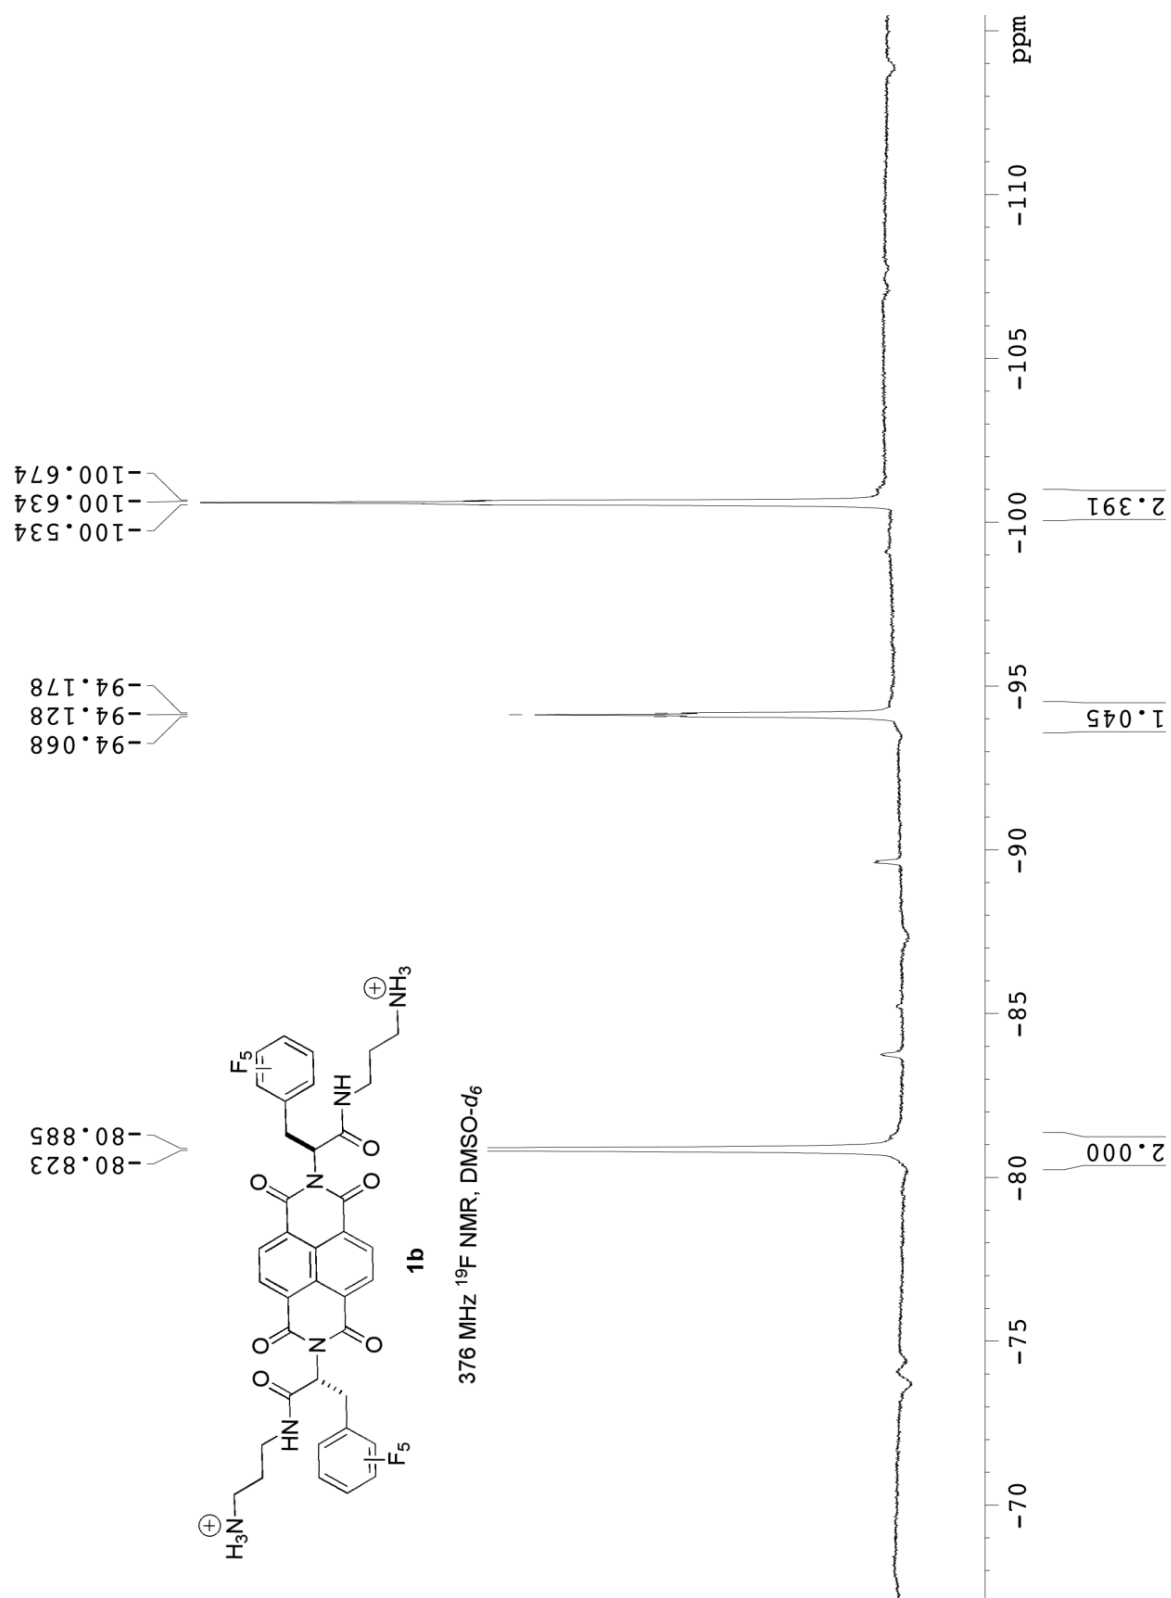

Figure S14.  $^{19}\text{F}$  NMR of **1b**.

ESR Spectrum of Standard DPPH Sample with 20 G Sweep Width at Room Temperature (298K)

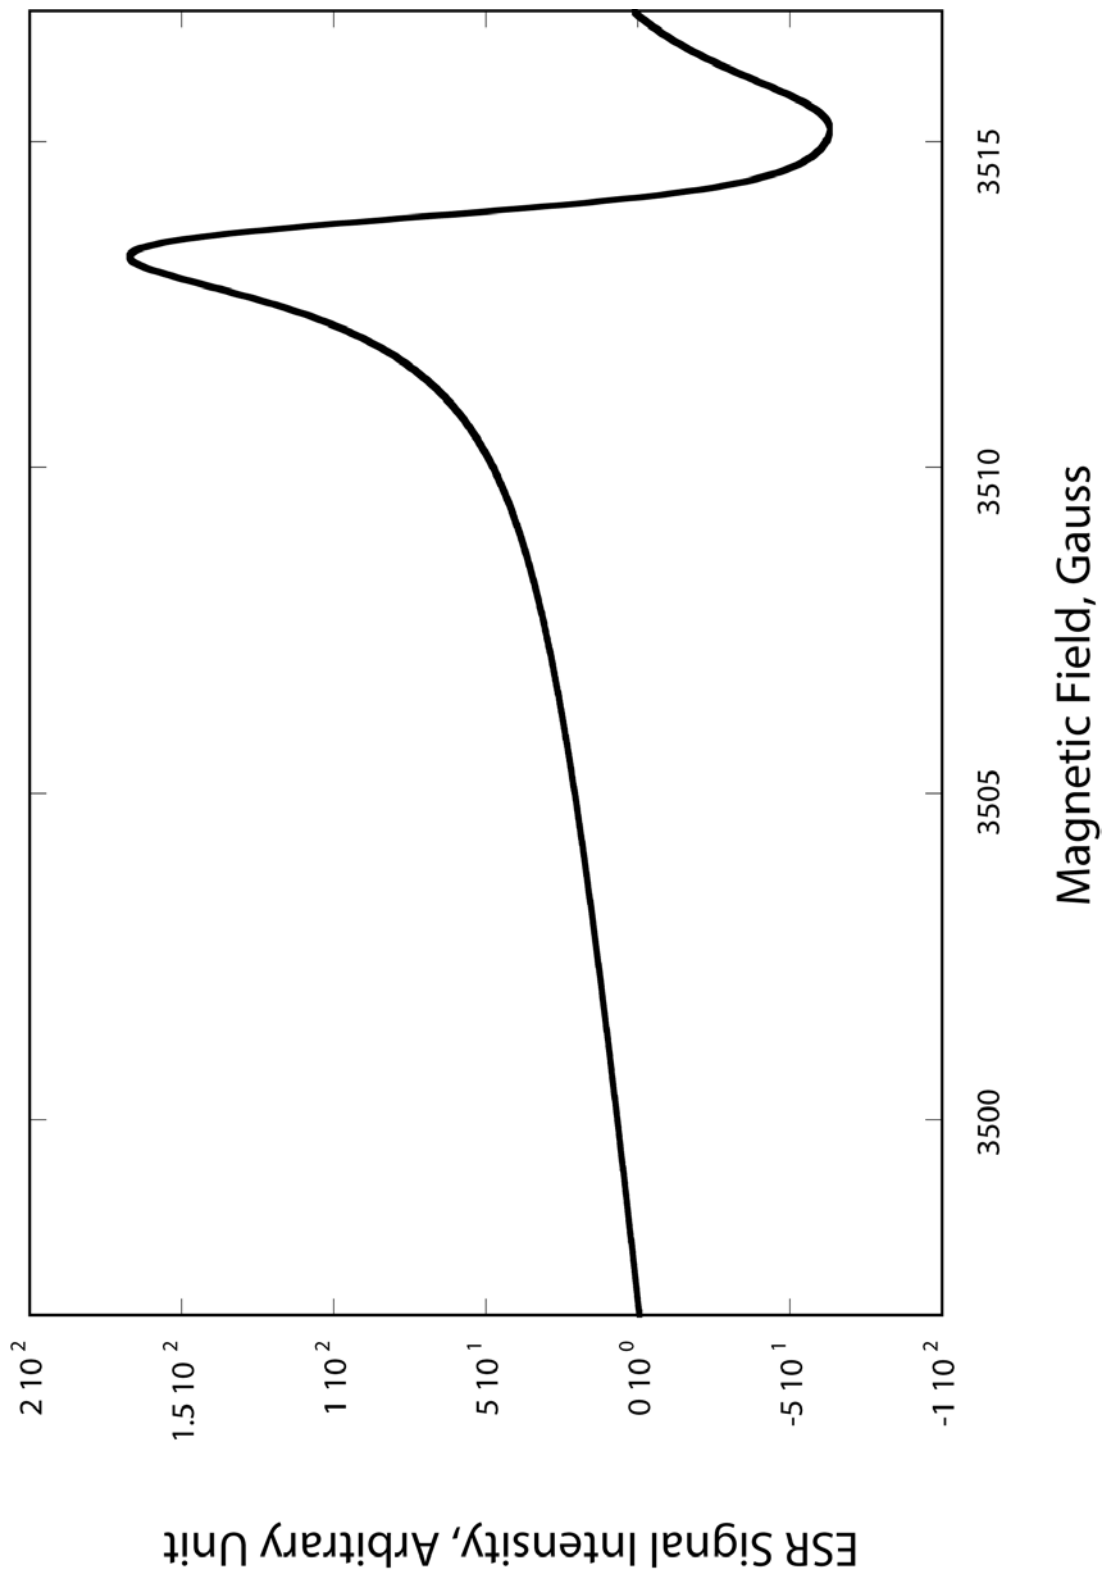

Figure S15. ESR spectrum of DPPH standard

ESR Spectrum of Sample 1a with 20 G Sweep Width at Room Temperature (298K)

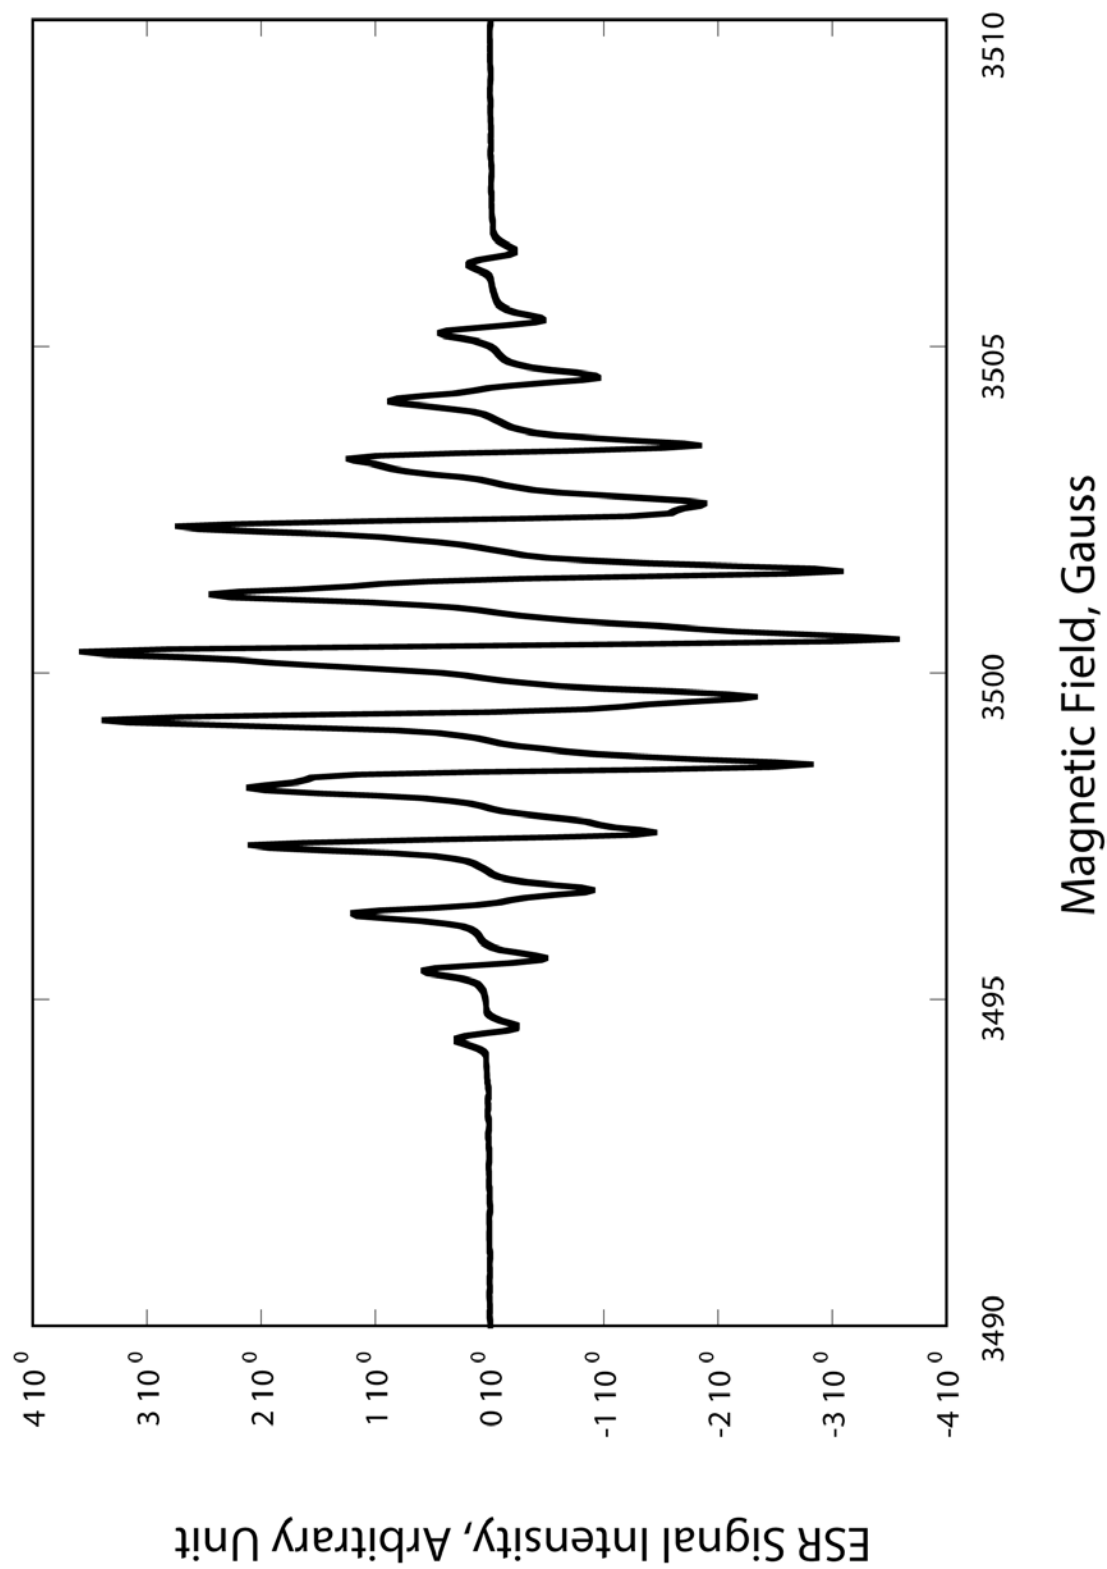

Figure S16. ESR Spectrum of compound 1a.

ESR Spectrum of Standard 1b Sample with 20 G Sweep Width at Room Temperature (298K)

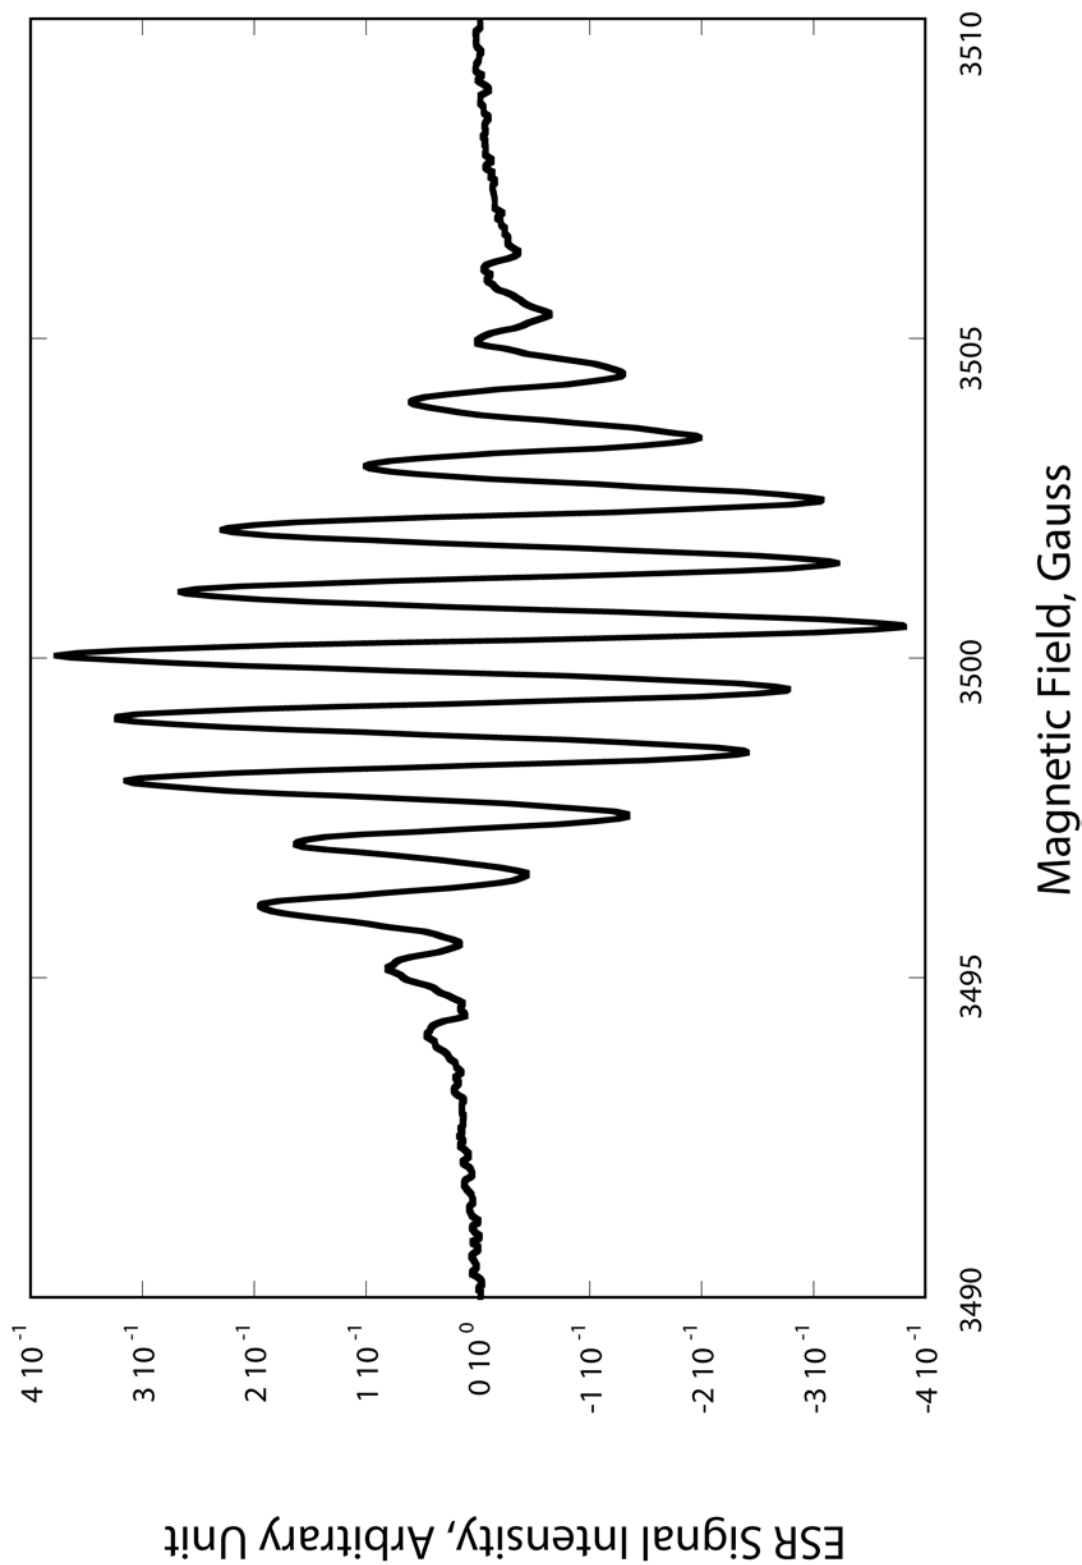

Figure S17. ESR Spectrum of compound 1b



**Table S1.** EPR g values, hyperfine coupling and line widths at half height of radical anions in aqueous solution at room temperature (~296 K).

| Compound  | g-value | Hyperfine Coupling |               | EPR Line width ( $\Delta H_{1/2}$ , Gauss) | Comment                                           |
|-----------|---------|--------------------|---------------|--------------------------------------------|---------------------------------------------------|
|           |         | $a_N$ , Gauss      | $a_H$ , Gauss |                                            |                                                   |
| <b>1a</b> | 1.9956  | 1.0                | 2.0           | 0.19                                       | Aqueous Solution<br>Strong signal at $g \sim 2.0$ |
| <b>1b</b> | 1.9956  | 1.0                | 2.0           | 0.22                                       | Aqueous Solution<br>Strong signal at $g \sim 2.0$ |

The observed EPR spectra from these radical anions can be described as a thirteen-line ESR signal centered at  $g \sim 2.0$  Gauss. The EPR line widths and nitrogen ( $^{14}\text{N}$ ,  $I = 1$ ) and proton ( $^1\text{H}$ ,  $I = 1/2$ ) isotropic hyperfine coupling constants ( $a_N$  and  $a_H$ ) of the samples were calculated from the EPR spectra and are reported here.

**Typical EPR measurement parameters**

|                           |                      |
|---------------------------|----------------------|
| Microwave Frequency:      | 9.86 GHz             |
| Modulation Frequency:     | 100 KHz              |
| Modulation Amplitude:     | 9.8 Gauss            |
| Microwave Power:          | 25 dB or 0.63 mwatts |
| Center Field              | 3500 Gauss           |
| Sweep Width:              | 20 or 200 Gauss      |
| Conversion Time:          | 167 ms               |
| Number of digital points: | 1200                 |
| Receiver Gain             | 30 dB                |

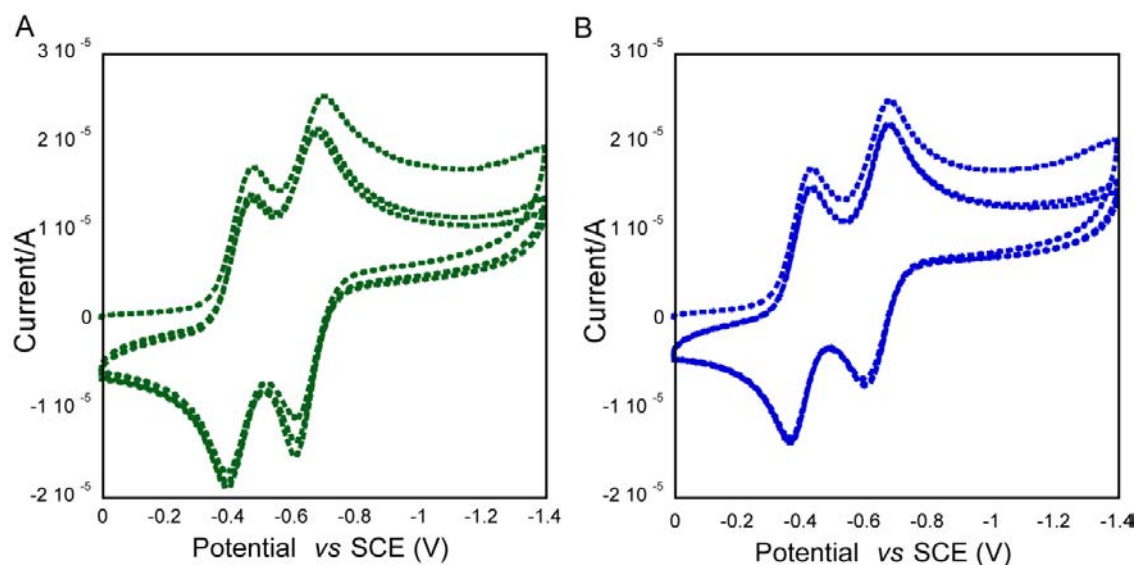

**Figure S18.** Multiple CV measurements in acetonitrile/H<sub>2</sub>O (1:1) with tetra-N-butylammonium perchlorate (TBAPC) as the supporting electrolyte at 20 °C at a glassy carbon working electrode at scan rate of 200 mV s<sup>-1</sup> (A) **1a** and (B) **1b**.

**Table S2.** Cyclic voltammetric data obtained for reduction of **1a** and **1b** in acetonitrile/H<sub>2</sub>O at a scan rate of 200 mV s<sup>-1</sup> (0.1 M TBAPC).

|           | $E_{PC}/V$ | $E_{PA}/V$ | $\Delta E_p [V]^a$ | $E^{\circ}_f [V]^b$ |
|-----------|------------|------------|--------------------|---------------------|
| <b>1a</b> | -0.444     | -0.451     | 0.007              | -0.447              |
|           | -0.668     | -0.666     | 0.002              | -0.667              |
| <b>1b</b> | -0.386     | -0.428     | 0.042              | -0.407              |
|           | -0.612     | -0.673     | 0.061              | -0.642              |

<sup>a</sup> $\Delta E_p = E_{PA} - E_{PC}$ , <sup>b</sup>the reversible potential  $E^{\circ}_f$  calculated as  $(E_{PC} + E_{PA})/2$ , where  $E_{PC}$  reduction potential,  $E_{PA}$  oxidation potential.  $E_{PC}$ ,  $E_{PA}$ , and  $\Delta E_p(V)$  refer potential vs SCE.

## Quantum yield calculation

A TECAN Infinite plate reader fluorimeter was used for these photophysical measurements. Fluorescein solution (0.1 M NaOH) ( $\Phi_{std} = 0.92$ ) used as a quantum yield standard. Peptide- $\pi$  conjugates **1a** and **1b** (50  $\mu$ M in mM Na<sub>2</sub>S<sub>2</sub>O<sub>4</sub>) were prepared in unbuffered water for the photophysical characterization. The quantum yields were calculated using equation 1 below. The quantum yield is reported as the average of three measurements.

$$\Phi_x = \Phi_{std} \left[ \frac{I_x}{I_{std}} \right] \left[ \frac{A_{std}}{A_x} \right] \left[ \frac{\eta_x^2}{\eta_{std}^2} \right] \dots\dots\dots 1$$

Where

$\Phi$  - quantum yield, I-integrated emission, A-absorption at the excitation wavelength

$\eta$ - refractive index, x- sample, std- standard sample.

### Single crystal X-ray structure for **3a**

A crystal of **3a** (0.28 x 0.24 x 0.10 mm<sup>3</sup>) was placed onto the tip of a 0.1 mm diameter glass capillary tube or fiber and mounted on a Bruker SMART APEX II CCD Platform diffractometer for a data collection at 100.0(5) K (*APEX2*, version 2011.4-1; Bruker AXS: Madison, WI, 2011). A preliminary set of cell constants and an orientation matrix were calculated from reflections harvested from three orthogonal wedges of reciprocal space. The full data collection was carried out using MoK $\alpha$  radiation (graphite monochromator) with a frame time of 60 seconds and a detector distance of 4.01 cm. A randomly oriented region of reciprocal space was surveyed: six major sections of frames were collected with 0.50° steps in  $\omega$  at six different  $\phi$  settings and a detector position of -38° in  $2\theta$ . The intensity data were corrected for absorption (Sheldrick, G. M. *SADABS*, version 2008/1; University of Göttingen: Göttingen, Germany, 2008). Final cell constants were calculated from the xyz centroids of 4082 strong reflections from the actual data collection after integration (*SAINT*, version 7.68A; Bruker AXS: Madison, WI, 2009). See Table 1 for additional crystal and refinement information.

### Single crystal X-ray structure for **3b**

A crystal of **3b** (0.32 x 0.16 x 0.08 mm<sup>3</sup>) was placed onto the tip of a 0.1 mm diameter glass capillary tube or fiber and mounted on a Bruker SMART APEX II CCD Platform diffractometer for a data collection at 100.0(5) K (*APEX2*, version 2011.4-1; Bruker AXS: Madison, WI, 2011). A preliminary set of cell constants and an orientation matrix were calculated from reflections harvested from three orthogonal wedges of reciprocal space. The full data collection was carried out using MoK $\alpha$  radiation (graphite monochromator) with a frame time of 90 seconds and a detector distance of 4.01 cm. A randomly oriented region of reciprocal space was surveyed: six

major sections of frames were collected with  $0.50^\circ$  steps in  $\omega$  at six different  $\phi$  settings and a detector position of  $-38^\circ$  in  $2\theta$ . The intensity data were corrected for absorption (Sheldrick, G. M. *SADABS*, version 2008/1; University of Göttingen: Göttingen, Germany, 2008). Final cell constants were calculated from the xyz centroids of 4083 strong reflections from the actual data collection after integration (*SAINTE*, version 7.68A; Bruker AXS: Madison, WI, 2009). See Table 1 for additional crystal and refinement information.

### Structure solution and refinement for 3a and 3b

The structures were solved using SIR97 (Altomare, A.; Burla, M. C.; Camalli, M.; Cascarano, G. L.; Giacovazzo, C.; Guagliardi, A.; Moliterni, A. G. G.; Polidori, G.; Spagna, R. *SIR97: A new program for solving and refining crystal structures*; Istituto di Cristallografia, CNR: Bari, Italy, 1999) and refined using SHELXL-97 (Sheldrick, G. M. *Acta. Cryst.* **2008**, *A64*, 112-122). The space group  $P2_1/n$  was determined based on systematic absences. A direct-methods solution was calculated which provided most non-hydrogen atoms from the E-map. Full-matrix least squares / difference Fourier cycles were performed which located the remaining non-hydrogen atoms. All non-hydrogen atoms were refined with anisotropic displacement parameters. The amine hydrogen atoms were found from the difference Fourier map, and their positional and isotropic displacement parameters were refined independently from those of their respective bonded nitrogen atoms. All other hydrogen atoms were placed in ideal positions and refined as riding atoms with relative isotropic displacement parameters. The final full matrix least squares refinement converged to  $R1 = 0.0476$  ( $F^2$ ,  $I > 2\sigma(I)$ ) and  $wR2 = 0.1120$  ( $F^2$ , all data).

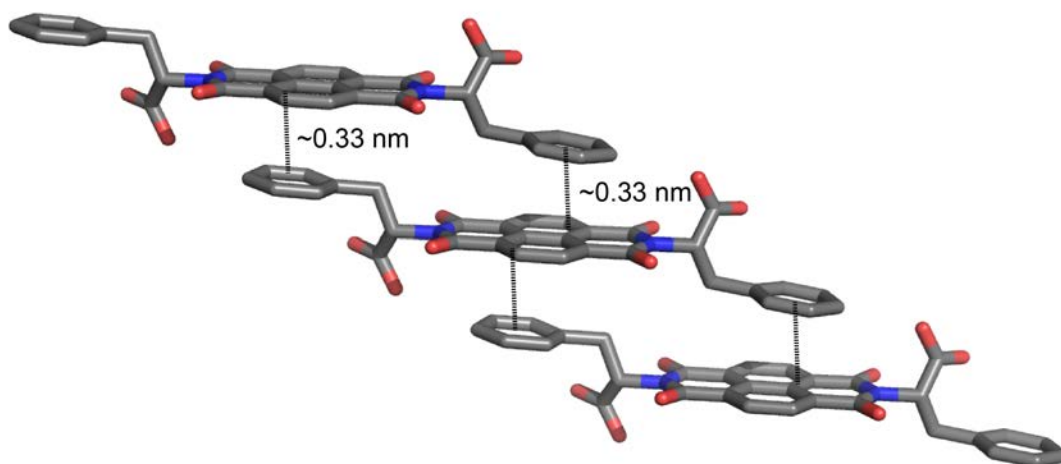

**Figure S19.** Crystal packing of 2a.

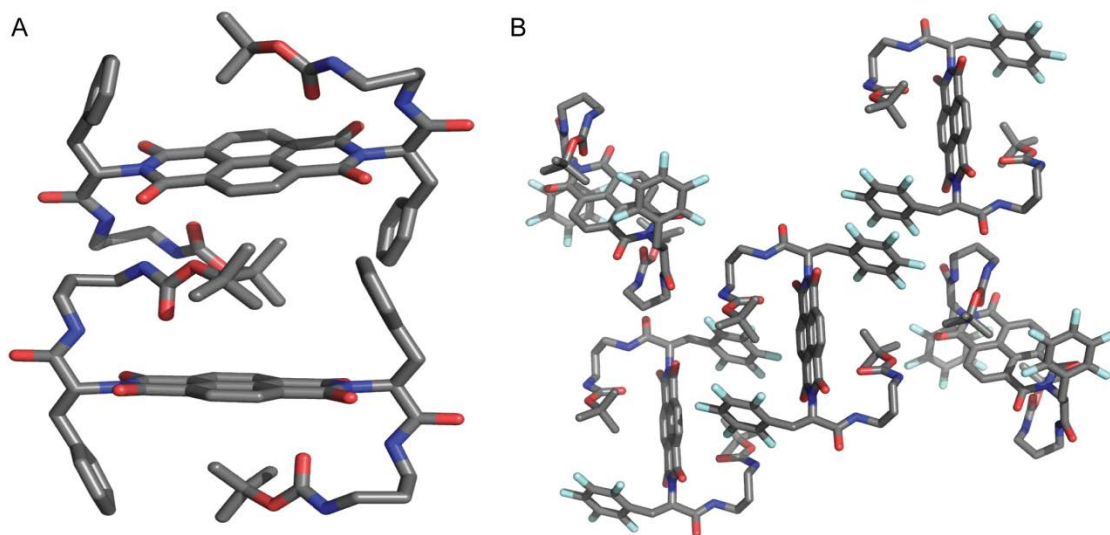

**Figure S20.** Crystal packing of (A) 3a (B) 3b.

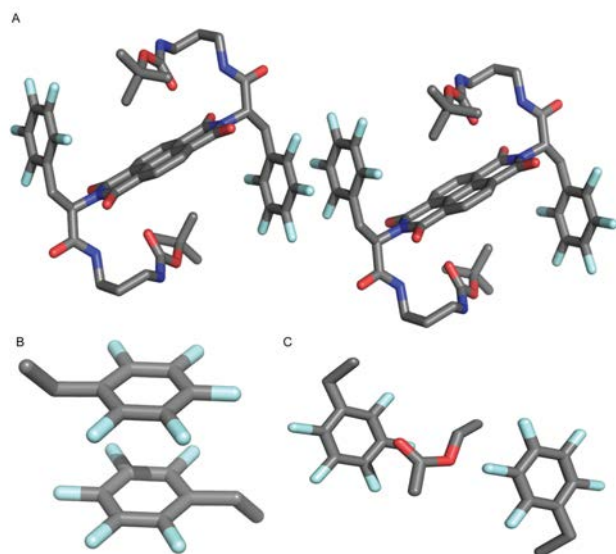

**Figure S21.** Crystal packing mode of (A) **3b**. (B) Local dipole interaction between opposing F<sub>5</sub>-Phe rings of **3b**. (C) Solvent assisted aromatic interactions in **3b**.



**Appendix 1. Crystal Structure Report for 2a**

## CRYSTAL STRUCTURE REPORT

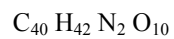

or

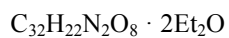

Report prepared for:

W. Liyanage, Prof. B. Nilsson

October 24, 2011

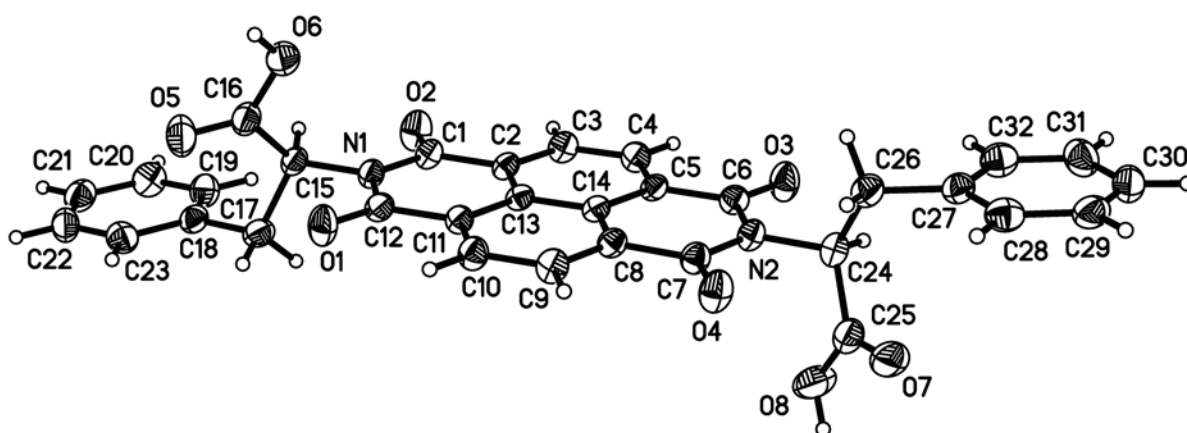

William W. Brennessel

X-ray Crystallographic Facility

Department of Chemistry, University of Rochester

120 Trustee Road

Rochester, NY 14627

### Data collection

A crystal (0.44 x 0.28 x 0.14 mm<sup>3</sup>) was placed onto the tip of a 0.1 mm diameter glass capillary tube or fiber and mounted on a Bruker SMART APEX II CCD Platform diffractometer for a data collection at 173(2) K.<sup>1</sup> A preliminary set of cell constants and an orientation matrix were calculated from reflections harvested from three orthogonal wedges of reciprocal space. The full data collection was carried out using MoK $\alpha$  radiation (graphite monochromator) with a frame time of 60 seconds and a detector distance of 3.99 cm. A randomly oriented region of reciprocal space was surveyed: four major sections of frames were collected with 0.50° steps in  $\omega$  at four different  $\phi$  settings and a detector position of -38° in  $2\theta$ . The intensity data were corrected for absorption.<sup>2</sup> Final cell constants were calculated from the xyz centroids of 3773 strong reflections from the actual data collection after integration.<sup>3</sup> See Table 1 for additional crystal and refinement information.

### Structure solution and refinement

The structure was solved using SIR97<sup>4</sup> and refined using SHELXL-97.<sup>5</sup> The space group  $P2_1$  was determined based on systematic absences and intensity statistics. A direct-methods solution was calculated which provided most non-hydrogen atoms from the E-map. Full-matrix least squares / difference Fourier cycles were performed which located the remaining non-hydrogen atoms. All non-hydrogen atoms were refined with anisotropic displacement parameters. All hydrogen atoms were placed in ideal positions and refined as riding atoms with relative isotropic displacement parameters. Due to the lack of significant anomalous dispersion effects, the absolute configuration could not be determined from the experiment. However, the chemist provided the absolute configuration based on the synthetic procedure. Friedel opposites were merged in the final refinement. The final full matrix least squares refinement converged to  $R1 = 0.0573$  ( $F^2$ ,  $I > 2\sigma(I)$ ) and  $wR2 = 0.1767$  ( $F^2$ , all data).

### Structure description

The structure is the one suggested with all atoms in general positions. There are two hydrogen-bonded (see Table 7) co-crystallized diethyl ether solvent molecules per featured organic molecule; each is modeled as disordered over two positions (73:27 and 88:12). Pi-stacking on the order of  $\sim 3.3$  Å is likely responsible for one-dimensional stacks of molecules (see diagram).

Unless noted otherwise all structural diagrams containing thermal displacement ellipsoids are drawn at the 50 % probability level.

Data collection, structure solution, and structure refinement were conducted at the X-ray Crystallographic Facility, B51 Hutchison Hall, Department of Chemistry, University of Rochester. All publications arising from this report MUST either 1) include William W. Brennessel as a coauthor or 2) acknowledge William W. Brennessel and the X-ray Crystallographic Facility of the Department of Chemistry at the University of Rochester.

- 
- <sup>1</sup> *APEX2*, version 2011.4-1; Bruker AXS: Madison, WI, 2011.
- <sup>2</sup> Sheldrick, G. M. *SADABS*, version 2008/1; University of Göttingen: Göttingen, Germany, 2008.
- <sup>3</sup> *SAINTE*, version 7.68A; Bruker AXS: Madison, WI, 2009.
- <sup>4</sup> Altomare, A.; Burla, M. C.; Camalli, M.; Casciarano, G. L.; Giacovazzo, C.; Guagliardi, A.; Moliterni, A. G. G.; Polidori, G.; Spagna, R. *SIR97: A new program for solving and refining crystal structures*; Istituto di Cristallografia, CNR: Bari, Italy, 1999.
- <sup>5</sup> Sheldrick, G. M. *Acta. Cryst.* **2008**, *A64*, 112-122.

Some equations of interest:

$$R_{\text{int}} = \frac{\sum |F_o^2 - \langle F_o^2 \rangle|}{\sum F_o^2}$$

$$R1 = \frac{\sum ||F_o| - |F_c||}{\sum |F_o|}$$

$$wR2 = \left[ \frac{\sum [w(F_o^2 - F_c^2)^2]}{\sum [w(F_o^2)^2]} \right]^{1/2}$$

where  $w = 1 / [\sigma^2 (F_o^2) + (aP)^2 + bP]$  and

$$P = 1/3 \max (0, F_o^2) + 2/3 F_c^2$$

$$\text{GOF} = S = \left[ \frac{\sum [w(F_o^2 - F_c^2)^2]}{(m-n)} \right]^{1/2}$$

where  $m$  = number of reflections and  $n$  = number of parameters

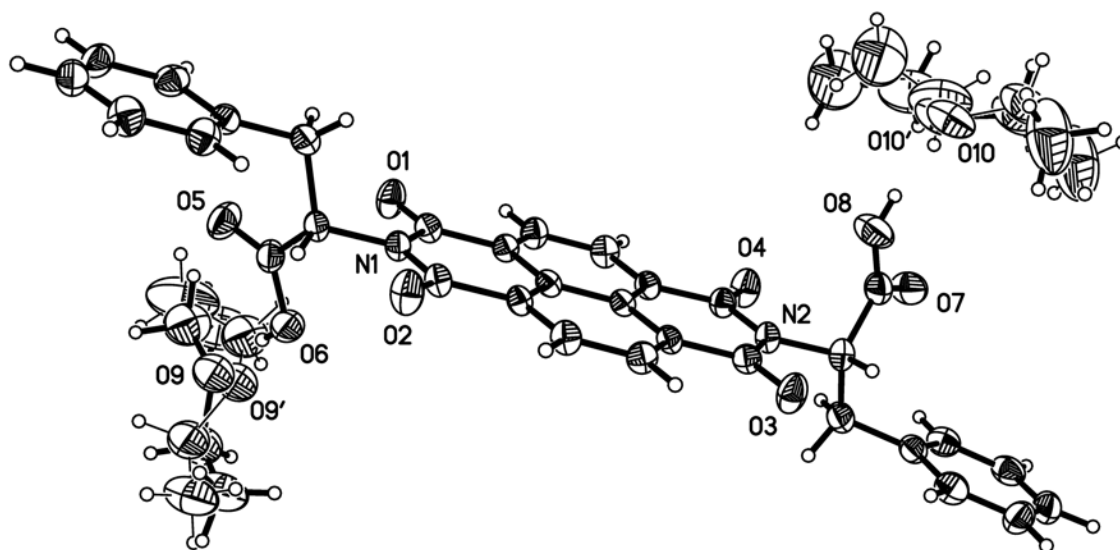

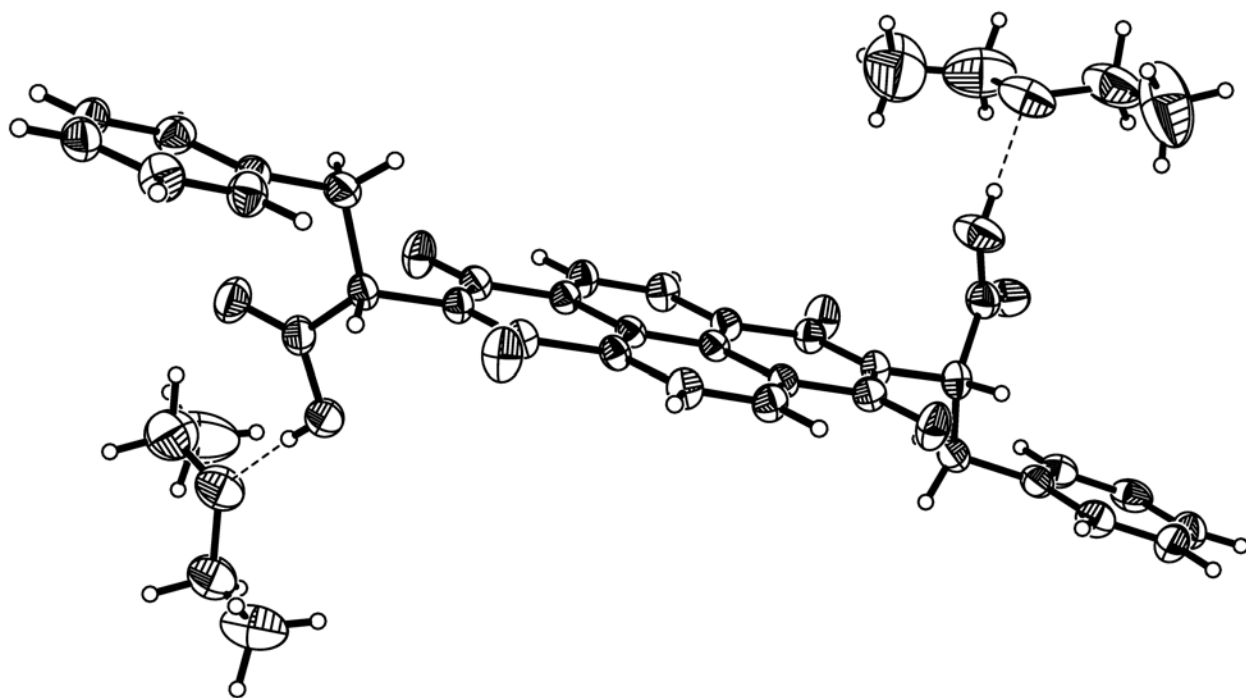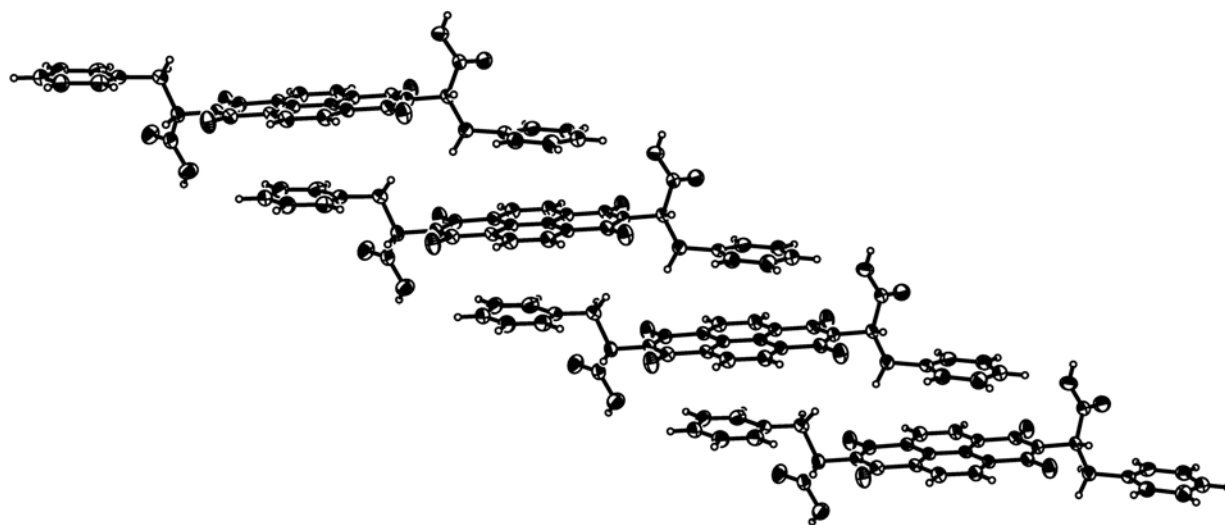

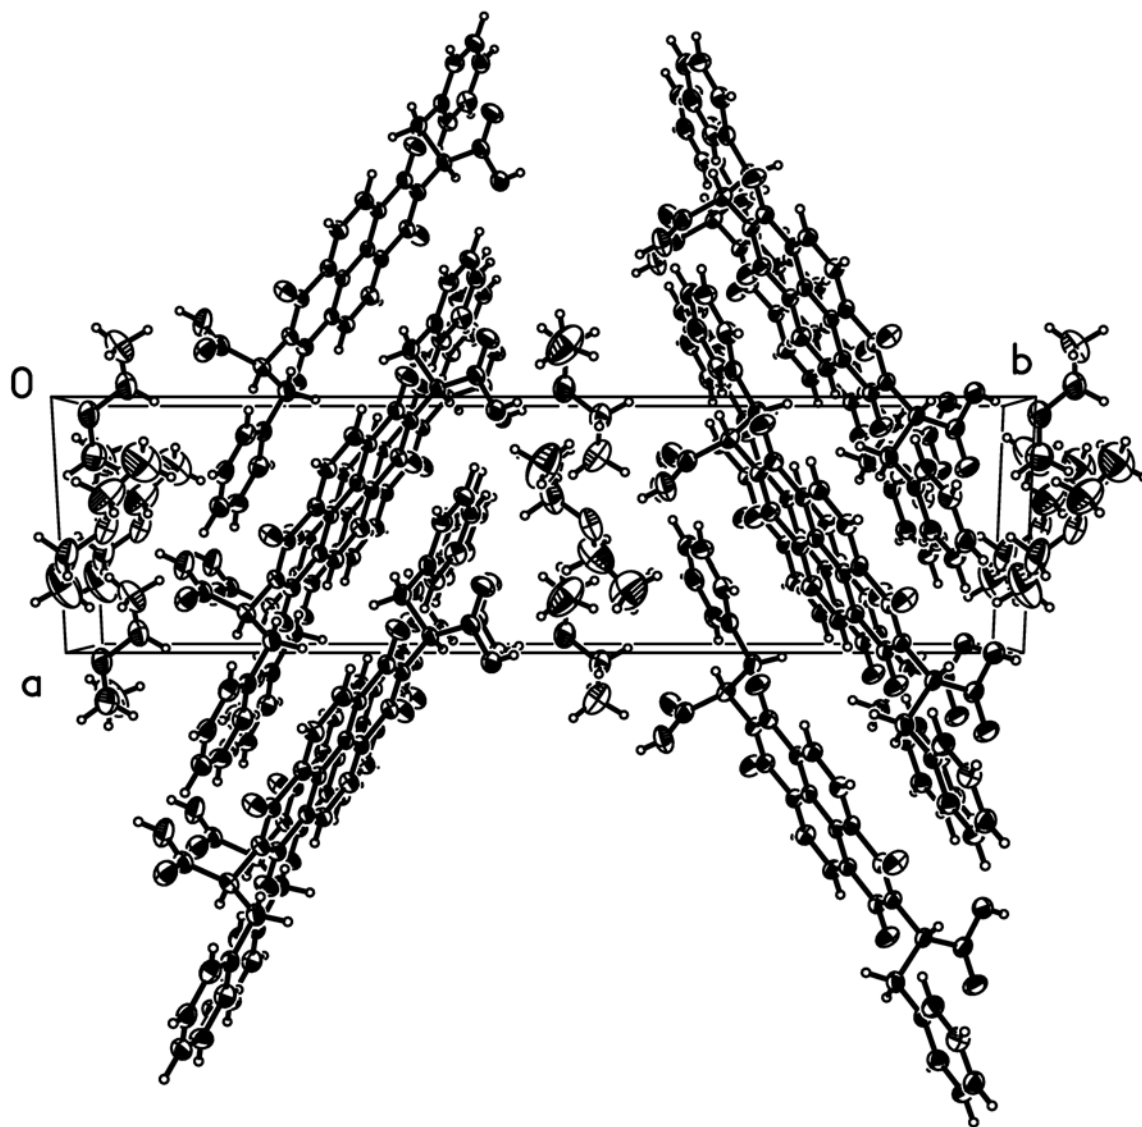

Table 1. Crystal data and structure refinement for nilwl03.

|                                                     |                                                                |                            |
|-----------------------------------------------------|----------------------------------------------------------------|----------------------------|
| Identification code                                 | nilwl03                                                        |                            |
| Empirical formula                                   | C <sub>40</sub> H <sub>42</sub> N <sub>2</sub> O <sub>10</sub> |                            |
| Formula weight                                      | 710.76                                                         |                            |
| Temperature                                         | 173(2) K                                                       |                            |
| Wavelength                                          | 0.71073 Å                                                      |                            |
| Crystal system                                      | Monoclinic                                                     |                            |
| Space group                                         | <i>P</i> 2 <sub>1</sub>                                        |                            |
| Unit cell dimensions                                | <i>a</i> = 8.1121(12) Å                                        | $\alpha = 90^\circ$        |
|                                                     | <i>b</i> = 28.530(4) Å                                         | $\beta = 111.988(3)^\circ$ |
|                                                     | <i>c</i> = 8.3555(12) Å                                        | $\gamma = 90^\circ$        |
| Volume                                              | 1793.1(5) Å <sup>3</sup>                                       |                            |
| <i>Z</i>                                            | 2                                                              |                            |
| Density (calculated)                                | 1.316 Mg/m <sup>3</sup>                                        |                            |
| Absorption coefficient                              | 0.095 mm <sup>-1</sup>                                         |                            |
| <i>F</i> (000)                                      | 752                                                            |                            |
| Crystal color, morphology                           | yellow, plate                                                  |                            |
| Crystal size                                        | 0.44 x 0.28 x 0.14 mm <sup>3</sup>                             |                            |
| Theta range for data collection                     | 1.43 to 31.51°                                                 |                            |
| Index ranges                                        | -11 ≤ <i>h</i> ≤ 11, -41 ≤ <i>k</i> ≤ 41, -12 ≤ <i>l</i> ≤ 12  |                            |
| Reflections collected                               | 31686                                                          |                            |
| Independent reflections                             | 6065 [ <i>R</i> (int) = 0.0584]                                |                            |
| Observed reflections                                | 4392                                                           |                            |
| Completeness to theta = 31.51°                      | 100.0%                                                         |                            |
| Absorption correction                               | Multi-scan                                                     |                            |
| Max. and min. transmission                          | 0.9868 and 0.9595                                              |                            |
| Refinement method                                   | Full-matrix least-squares on <i>F</i> <sup>2</sup>             |                            |
| Data / restraints / parameters                      | 6065 / 39 / 509                                                |                            |
| Goodness-of-fit on <i>F</i> <sup>2</sup>            | 1.033                                                          |                            |
| Final <i>R</i> indices [ <i>I</i> > 2σ( <i>I</i> )] | <i>R</i> 1 = 0.0573, <i>wR</i> 2 = 0.1549                      |                            |
| <i>R</i> indices (all data)                         | <i>R</i> 1 = 0.0854, <i>wR</i> 2 = 0.1767                      |                            |
| Largest diff. peak and hole                         | 0.338 and -0.279 e.Å <sup>-3</sup>                             |                            |

Table 2. Atomic coordinates ( $\times 10^4$ ) and equivalent isotropic displacement parameters ( $\text{\AA}^2 \times 10^3$ ) for nilwl03.  $U_{\text{eq}}$  is defined as one third of the trace of the orthogonalized  $U_{ij}$  tensor.

|     | x        | y       | z        | $U_{\text{eq}}$ |
|-----|----------|---------|----------|-----------------|
| O1  | -1044(3) | 3530(1) | 3930(3)  | 39(1)           |
| O2  | 2323(3)  | 3505(1) | 646(3)   | 41(1)           |
| O3  | 8845(3)  | 2191(1) | 7111(3)  | 41(1)           |
| O4  | 5363(3)  | 2187(1) | 10287(3) | 39(1)           |
| O5  | -2673(3) | 4376(1) | 1539(3)  | 47(1)           |
| O6  | 266(3)   | 4463(1) | 2907(3)  | 43(1)           |
| O7  | 7813(4)  | 1340(1) | 11912(3) | 47(1)           |
| O8  | 6536(4)  | 1244(1) | 9066(3)  | 53(1)           |
| N1  | 666(3)   | 3532(1) | 2324(3)  | 26(1)           |
| N2  | 7088(3)  | 2185(1) | 8685(3)  | 27(1)           |
| C1  | 2170(4)  | 3399(1) | 1989(4)  | 28(1)           |
| C2  | 3523(4)  | 3116(1) | 3346(3)  | 24(1)           |
| C3  | 5059(4)  | 2979(1) | 3133(4)  | 29(1)           |
| C4  | 6347(4)  | 2720(1) | 4412(4)  | 29(1)           |
| C5  | 6103(4)  | 2593(1) | 5901(4)  | 24(1)           |
| C6  | 7455(4)  | 2312(1) | 7240(4)  | 27(1)           |
| C7  | 5567(4)  | 2315(1) | 8978(4)  | 28(1)           |
| C8  | 4237(4)  | 2605(1) | 7646(3)  | 25(1)           |
| C9  | 2713(4)  | 2734(1) | 7867(4)  | 29(1)           |
| C10 | 1422(4)  | 3000(1) | 6579(4)  | 30(1)           |
| C11 | 1683(4)  | 3126(1) | 5112(4)  | 24(1)           |
| C12 | 317(4)   | 3407(1) | 3787(4)  | 27(1)           |
| C13 | 3240(3)  | 2993(1) | 4848(3)  | 22(1)           |
| C14 | 4542(4)  | 2729(1) | 6148(3)  | 23(1)           |
| C15 | -695(4)  | 3820(1) | 1015(4)  | 28(1)           |
| C16 | -1175(4) | 4246(1) | 1853(4)  | 33(1)           |
| C17 | -2316(4) | 3526(1) | -62(4)   | 34(1)           |
| C18 | -3457(4) | 3769(1) | -1714(4) | 30(1)           |
| C19 | -2857(4) | 3826(1) | -3049(4) | 36(1)           |
| C20 | -3888(5) | 4038(1) | -4580(5) | 41(1)           |
| C21 | -5561(5) | 4203(1) | -4797(4) | 40(1)           |

|      |           |          |            |        |
|------|-----------|----------|------------|--------|
| C22  | -6196(4)  | 4145(1)  | -3473(5)   | 39(1)  |
| C23  | -5159(4)  | 3928(1)  | -1958(4)   | 35(1)  |
| C24  | 8406(4)   | 1900(1)  | 10036(4)   | 30(1)  |
| C25  | 7545(4)   | 1469(1)  | 10476(4)   | 37(1)  |
| C26  | 9455(4)   | 2195(1)  | 11621(4)   | 35(1)  |
| C27  | 11122(4)  | 1958(1)  | 12809(4)   | 31(1)  |
| C28  | 11293(5)  | 1814(1)  | 14450(4)   | 36(1)  |
| C29  | 12832(5)  | 1600(1)  | 15545(4)   | 40(1)  |
| C30  | 14213(5)  | 1519(1)  | 14983(5)   | 42(1)  |
| C31  | 14066(4)  | 1665(1)  | 13368(5)   | 41(1)  |
| C32  | 12545(5)  | 1882(1)  | 12294(4)   | 37(1)  |
| C33  | 2150(16)  | 5549(4)  | 4660(20)   | 85(3)  |
| C34  | 630(20)   | 5583(4)  | 5160(30)   | 72(3)  |
| O9   | -529(8)   | 5200(2)  | 4391(8)    | 57(1)  |
| C35  | -2203(10) | 5227(3)  | 4568(11)   | 73(2)  |
| C36  | -2155(18) | 5211(5)  | 6326(15)   | 119(4) |
| C37  | 2505(14)  | 870(4)   | 9660(14)   | 120(4) |
| C38  | 3843(13)  | 534(4)   | 10580(11)  | 100(3) |
| O10  | 5069(7)   | 480(1)   | 9749(6)    | 61(1)  |
| C39  | 6175(10)  | 81(2)    | 10409(9)   | 81(2)  |
| C40  | 7338(18)  | 0(4)     | 9458(14)   | 126(4) |
| C33' | 1810(50)  | 5714(11) | 4380(70)   | 85(3)  |
| C34' | 340(70)   | 5621(10) | 4920(90)   | 72(3)  |
| O9'  | -70(20)   | 5136(7)  | 4910(30)   | 57(1)  |
| C35' | -1260(30) | 5020(7)  | 5740(30)   | 73(2)  |
| C36' | -3030(30) | 5215(11) | 4970(40)   | 119(4) |
| C37' | 2730(70)  | 540(30)  | 9770(100)  | 120(4) |
| C38' | 4590(80)  | 410(30)  | 10500(60)  | 100(3) |
| O10' | 5420(50)  | 421(11)  | 9280(50)   | 61(1)  |
| C39' | 6320(60)  | -5(13)   | 9270(70)   | 81(2)  |
| C40' | 8110(70)  | -30(30)  | 10540(100) | 126(4) |

---



Table 3. Bond lengths [Å] and angles [°] for nilwl03.

|             |          |              |          |
|-------------|----------|--------------|----------|
| O(1)-C(12)  | 1.206(3) | C(13)-C(14)  | 1.416(3) |
| O(2)-C(1)   | 1.213(4) | C(15)-C(16)  | 1.524(4) |
| O(3)-C(6)   | 1.222(4) | C(15)-C(17)  | 1.535(4) |
| O(4)-C(7)   | 1.222(4) | C(15)-H(15)  | 1.0000   |
| O(5)-C(16)  | 1.202(4) | C(17)-C(18)  | 1.512(4) |
| O(6)-C(16)  | 1.324(4) | C(17)-H(17A) | 0.9900   |
| O(6)-H(6)   | 0.8400   | C(17)-H(17B) | 0.9900   |
| O(7)-C(25)  | 1.195(4) | C(18)-C(19)  | 1.384(4) |
| O(8)-C(25)  | 1.322(4) | C(18)-C(23)  | 1.394(4) |
| O(8)-H(8)   | 0.8400   | C(19)-C(20)  | 1.379(5) |
| N(1)-C(12)  | 1.400(4) | C(19)-H(19)  | 0.9500   |
| N(1)-C(1)   | 1.402(4) | C(20)-C(21)  | 1.383(5) |
| N(1)-C(15)  | 1.479(3) | C(20)-H(20)  | 0.9500   |
| N(2)-C(7)   | 1.394(4) | C(21)-C(22)  | 1.394(6) |
| N(2)-C(6)   | 1.394(4) | C(21)-H(21)  | 0.9500   |
| N(2)-C(24)  | 1.475(4) | C(22)-C(23)  | 1.377(5) |
| C(1)-C(2)   | 1.486(4) | C(22)-H(22)  | 0.9500   |
| C(2)-C(3)   | 1.381(4) | C(23)-H(23)  | 0.9500   |
| C(2)-C(13)  | 1.402(3) | C(24)-C(25)  | 1.526(4) |
| C(3)-C(4)   | 1.394(4) | C(24)-C(26)  | 1.530(4) |
| C(3)-H(3)   | 0.9500   | C(24)-H(24)  | 1.0000   |
| C(4)-C(5)   | 1.380(4) | C(26)-C(27)  | 1.505(4) |
| C(4)-H(4)   | 0.9500   | C(26)-H(26A) | 0.9900   |
| C(5)-C(14)  | 1.411(4) | C(26)-H(26B) | 0.9900   |
| C(5)-C(6)   | 1.476(4) | C(27)-C(28)  | 1.387(4) |
| C(7)-C(8)   | 1.479(4) | C(27)-C(32)  | 1.392(5) |
| C(8)-C(9)   | 1.368(4) | C(28)-C(29)  | 1.384(5) |
| C(8)-C(14)  | 1.408(4) | C(28)-H(28)  | 0.9500   |
| C(9)-C(10)  | 1.409(4) | C(29)-C(30)  | 1.387(6) |
| C(9)-H(9)   | 0.9500   | C(29)-H(29)  | 0.9500   |
| C(10)-C(11) | 1.368(4) | C(30)-C(31)  | 1.374(5) |
| C(10)-H(10) | 0.9500   | C(30)-H(30)  | 0.9500   |
| C(11)-C(13) | 1.413(3) | C(31)-C(32)  | 1.372(5) |
| C(11)-C(12) | 1.477(4) | C(31)-H(31)  | 0.9500   |

|               |           |                  |           |
|---------------|-----------|------------------|-----------|
| C(32)-H(32)   | 0.9500    | O(9')-C(35')     | 1.419(15) |
| C(33)-C(34)   | 1.446(10) | C(35')-C(36')    | 1.448(17) |
| C(33)-H(33A)  | 0.9800    | C(35')-H(35C)    | 0.9900    |
| C(33)-H(33B)  | 0.9800    | C(35')-H(35D)    | 0.9900    |
| C(33)-H(33C)  | 0.9800    | C(36')-H(36D)    | 0.9800    |
| C(34)-O(9)    | 1.427(11) | C(36')-H(36E)    | 0.9800    |
| C(34)-H(34A)  | 0.9900    | C(36')-H(36F)    | 0.9800    |
| C(34)-H(34B)  | 0.9900    | C(37')-C(38')    | 1.45(2)   |
| O(9)-C(35)    | 1.422(9)  | C(37')-H(37D)    | 0.9800    |
| C(35)-C(36)   | 1.455(11) | C(37')-H(37E)    | 0.9800    |
| C(35)-H(35A)  | 0.9900    | C(37')-H(37F)    | 0.9800    |
| C(35)-H(35B)  | 0.9900    | C(38')-O(10')    | 1.416(18) |
| C(36)-H(36A)  | 0.9800    | C(38')-H(38C)    | 0.9900    |
| C(36)-H(36B)  | 0.9800    | C(38')-H(38D)    | 0.9900    |
| C(36)-H(36C)  | 0.9800    | O(10')-C(39')    | 1.422(17) |
| C(37)-C(38)   | 1.437(12) | C(39')-C(40')    | 1.444(19) |
| C(37)-H(37A)  | 0.9800    | C(39')-H(39C)    | 0.9900    |
| C(37)-H(37B)  | 0.9800    | C(39')-H(39D)    | 0.9900    |
| C(37)-H(37C)  | 0.9800    | C(40')-H(40D)    | 0.9800    |
| C(38)-O(10)   | 1.419(9)  | C(40')-H(40E)    | 0.9800    |
| C(38)-H(38A)  | 0.9900    | C(40')-H(40F)    | 0.9800    |
| C(38)-H(38B)  | 0.9900    | C(16)-O(6)-H(6)  | 109.5     |
| O(10)-C(39)   | 1.427(8)  | C(25)-O(8)-H(8)  | 109.5     |
| C(39)-C(40)   | 1.461(12) | C(12)-N(1)-C(1)  | 125.5(2)  |
| C(39)-H(39A)  | 0.9900    | C(12)-N(1)-C(15) | 116.6(2)  |
| C(39)-H(39B)  | 0.9900    | C(1)-N(1)-C(15)  | 117.9(2)  |
| C(40)-H(40A)  | 0.9800    | C(7)-N(2)-C(6)   | 125.0(2)  |
| C(40)-H(40B)  | 0.9800    | C(7)-N(2)-C(24)  | 116.5(2)  |
| C(40)-H(40C)  | 0.9800    | C(6)-N(2)-C(24)  | 118.5(2)  |
| C(33')-C(34') | 1.448(16) | O(2)-C(1)-N(1)   | 121.0(3)  |
| C(33')-H(33D) | 0.9800    | O(2)-C(1)-C(2)   | 122.6(3)  |
| C(33')-H(33E) | 0.9800    | N(1)-C(1)-C(2)   | 116.4(2)  |
| C(33')-H(33F) | 0.9800    | C(3)-C(2)-C(13)  | 120.2(2)  |
| C(34')-O(9')  | 1.422(16) | C(3)-C(2)-C(1)   | 120.0(2)  |
| C(34')-H(34C) | 0.9900    | C(13)-C(2)-C(1)  | 119.8(2)  |
| C(34')-H(34D) | 0.9900    | C(2)-C(3)-C(4)   | 120.3(3)  |

|                   |          |                     |          |
|-------------------|----------|---------------------|----------|
| C(2)-C(3)-H(3)    | 119.8    | N(1)-C(15)-C(17)    | 111.6(2) |
| C(4)-C(3)-H(3)    | 119.8    | C(16)-C(15)-C(17)   | 113.3(2) |
| C(5)-C(4)-C(3)    | 120.7(3) | N(1)-C(15)-H(15)    | 107.0    |
| C(5)-C(4)-H(4)    | 119.6    | C(16)-C(15)-H(15)   | 107.0    |
| C(3)-C(4)-H(4)    | 119.6    | C(17)-C(15)-H(15)   | 107.0    |
| C(4)-C(5)-C(14)   | 120.0(2) | O(5)-C(16)-O(6)     | 124.7(3) |
| C(4)-C(5)-C(6)    | 120.6(2) | O(5)-C(16)-C(15)    | 123.9(3) |
| C(14)-C(5)-C(6)   | 119.4(2) | O(6)-C(16)-C(15)    | 111.4(3) |
| O(3)-C(6)-N(2)    | 120.5(3) | C(18)-C(17)-C(15)   | 112.4(2) |
| O(3)-C(6)-C(5)    | 122.3(3) | C(18)-C(17)-H(17A)  | 109.1    |
| N(2)-C(6)-C(5)    | 117.2(2) | C(15)-C(17)-H(17A)  | 109.1    |
| O(4)-C(7)-N(2)    | 120.2(3) | C(18)-C(17)-H(17B)  | 109.1    |
| O(4)-C(7)-C(8)    | 122.4(3) | C(15)-C(17)-H(17B)  | 109.1    |
| N(2)-C(7)-C(8)    | 117.4(2) | H(17A)-C(17)-H(17B) | 107.9    |
| C(9)-C(8)-C(14)   | 121.4(2) | C(19)-C(18)-C(23)   | 118.2(3) |
| C(9)-C(8)-C(7)    | 119.4(2) | C(19)-C(18)-C(17)   | 120.6(3) |
| C(14)-C(8)-C(7)   | 119.2(2) | C(23)-C(18)-C(17)   | 121.2(3) |
| C(8)-C(9)-C(10)   | 119.5(2) | C(20)-C(19)-C(18)   | 121.6(3) |
| C(8)-C(9)-H(9)    | 120.2    | C(20)-C(19)-H(19)   | 119.2    |
| C(10)-C(9)-H(9)   | 120.2    | C(18)-C(19)-H(19)   | 119.2    |
| C(11)-C(10)-C(9)  | 120.4(3) | C(19)-C(20)-C(21)   | 119.8(3) |
| C(11)-C(10)-H(10) | 119.8    | C(19)-C(20)-H(20)   | 120.1    |
| C(9)-C(10)-H(10)  | 119.8    | C(21)-C(20)-H(20)   | 120.1    |
| C(10)-C(11)-C(13) | 121.1(2) | C(20)-C(21)-C(22)   | 119.4(3) |
| C(10)-C(11)-C(12) | 119.4(2) | C(20)-C(21)-H(21)   | 120.3    |
| C(13)-C(11)-C(12) | 119.5(2) | C(22)-C(21)-H(21)   | 120.3    |
| O(1)-C(12)-N(1)   | 120.3(3) | C(23)-C(22)-C(21)   | 120.2(3) |
| O(1)-C(12)-C(11)  | 122.8(3) | C(23)-C(22)-H(22)   | 119.9    |
| N(1)-C(12)-C(11)  | 116.9(2) | C(21)-C(22)-H(22)   | 119.9    |
| C(2)-C(13)-C(11)  | 121.9(2) | C(22)-C(23)-C(18)   | 120.8(3) |
| C(2)-C(13)-C(14)  | 119.7(2) | C(22)-C(23)-H(23)   | 119.6    |
| C(11)-C(13)-C(14) | 118.5(2) | C(18)-C(23)-H(23)   | 119.6    |
| C(8)-C(14)-C(5)   | 121.8(2) | N(2)-C(24)-C(25)    | 111.3(2) |
| C(8)-C(14)-C(13)  | 119.1(2) | N(2)-C(24)-C(26)    | 111.6(2) |
| C(5)-C(14)-C(13)  | 119.1(2) | C(25)-C(24)-C(26)   | 113.0(3) |
| N(1)-C(15)-C(16)  | 110.6(2) | N(2)-C(24)-H(24)    | 106.8    |

|                     |           |                      |           |
|---------------------|-----------|----------------------|-----------|
| C(25)-C(24)-H(24)   | 106.8     | O(9)-C(35)-C(36)     | 115.9(8)  |
| C(26)-C(24)-H(24)   | 106.8     | O(9)-C(35)-H(35A)    | 108.3     |
| O(7)-C(25)-O(8)     | 124.3(3)  | C(36)-C(35)-H(35A)   | 108.3     |
| O(7)-C(25)-C(24)    | 124.3(3)  | O(9)-C(35)-H(35B)    | 108.3     |
| O(8)-C(25)-C(24)    | 111.3(3)  | C(36)-C(35)-H(35B)   | 108.3     |
| C(27)-C(26)-C(24)   | 113.3(2)  | H(35A)-C(35)-H(35B)  | 107.4     |
| C(27)-C(26)-H(26A)  | 108.9     | O(10)-C(38)-C(37)    | 109.8(8)  |
| C(24)-C(26)-H(26A)  | 108.9     | O(10)-C(38)-H(38A)   | 109.7     |
| C(27)-C(26)-H(26B)  | 108.9     | C(37)-C(38)-H(38A)   | 109.7     |
| C(24)-C(26)-H(26B)  | 108.9     | O(10)-C(38)-H(38B)   | 109.7     |
| H(26A)-C(26)-H(26B) | 107.7     | C(37)-C(38)-H(38B)   | 109.7     |
| C(28)-C(27)-C(32)   | 118.1(3)  | H(38A)-C(38)-H(38B)  | 108.2     |
| C(28)-C(27)-C(26)   | 121.2(3)  | C(38)-O(10)-C(39)    | 110.6(6)  |
| C(32)-C(27)-C(26)   | 120.7(3)  | O(10)-C(39)-C(40)    | 110.9(6)  |
| C(29)-C(28)-C(27)   | 121.1(3)  | O(10)-C(39)-H(39A)   | 109.5     |
| C(29)-C(28)-H(28)   | 119.5     | C(40)-C(39)-H(39A)   | 109.5     |
| C(27)-C(28)-H(28)   | 119.5     | O(10)-C(39)-H(39B)   | 109.5     |
| C(28)-C(29)-C(30)   | 119.5(3)  | C(40)-C(39)-H(39B)   | 109.5     |
| C(28)-C(29)-H(29)   | 120.2     | H(39A)-C(39)-H(39B)  | 108.1     |
| C(30)-C(29)-H(29)   | 120.2     | O(9')-C(34')-C(33')  | 113(2)    |
| C(31)-C(30)-C(29)   | 119.9(3)  | O(9')-C(34')-H(34C)  | 108.9     |
| C(31)-C(30)-H(30)   | 120.1     | C(33')-C(34')-H(34C) | 108.9     |
| C(29)-C(30)-H(30)   | 120.1     | O(9')-C(34')-H(34D)  | 108.9     |
| C(32)-C(31)-C(30)   | 120.3(3)  | C(33')-C(34')-H(34D) | 108.9     |
| C(32)-C(31)-H(31)   | 119.8     | H(34C)-C(34')-H(34D) | 107.7     |
| C(30)-C(31)-H(31)   | 119.8     | C(35')-O(9')-C(34')  | 115.1(19) |
| C(31)-C(32)-C(27)   | 121.0(3)  | O(9')-C(35')-C(36')  | 115.8(19) |
| C(31)-C(32)-H(32)   | 119.5     | O(9')-C(35')-H(35C)  | 108.3     |
| C(27)-C(32)-H(32)   | 119.5     | C(36')-C(35')-H(35C) | 108.3     |
| O(9)-C(34)-C(33)    | 108.0(10) | O(9')-C(35')-H(35D)  | 108.3     |
| O(9)-C(34)-H(34A)   | 110.1     | C(36')-C(35')-H(35D) | 108.3     |
| C(33)-C(34)-H(34A)  | 110.1     | H(35C)-C(35')-H(35D) | 107.4     |
| O(9)-C(34)-H(34B)   | 110.1     | O(10')-C(38')-C(37') | 113(3)    |
| C(33)-C(34)-H(34B)  | 110.1     | O(10')-C(38')-H(38C) | 109.0     |
| H(34A)-C(34)-H(34B) | 108.4     | C(37')-C(38')-H(38C) | 109.0     |
| C(35)-O(9)-C(34)    | 113.9(7)  | O(10')-C(38')-H(38D) | 109.0     |

|                      |        |                      |       |
|----------------------|--------|----------------------|-------|
| C(37')-C(38')-H(38D) | 109.0  | C(40')-C(39')-H(39C) | 108.7 |
| H(38C)-C(38')-H(38D) | 107.8  | O(10')-C(39')-H(39D) | 108.7 |
| C(38')-O(10')-C(39') | 112(3) | C(40')-C(39')-H(39D) | 108.7 |
| O(10')-C(39')-C(40') | 114(3) | H(39C)-C(39')-H(39D) | 107.6 |
| O(10')-C(39')-H(39C) | 108.7  |                      |       |

---

Table 4. Anisotropic displacement parameters ( $\text{\AA}^2 \times 10^3$ ) for nilwl03. The anisotropic displacement factor exponent takes the form:  $-2\pi^2 [h^2 a^{*2} U_{11} + \dots + 2 h k a^* b^* U_{12}]$

|     | $U_{11}$ | $U_{22}$ | $U_{33}$ | $U_{23}$ | $U_{13}$ | $U_{12}$ |
|-----|----------|----------|----------|----------|----------|----------|
| O1  | 34(1)    | 47(1)    | 40(1)    | 10(1)    | 19(1)    | 14(1)    |
| O2  | 46(1)    | 51(1)    | 33(1)    | 13(1)    | 23(1)    | 14(1)    |
| O3  | 33(1)    | 50(1)    | 46(1)    | 16(1)    | 22(1)    | 13(1)    |
| O4  | 42(1)    | 48(1)    | 34(1)    | 14(1)    | 22(1)    | 12(1)    |
| O5  | 34(1)    | 45(1)    | 50(1)    | -9(1)    | 4(1)     | 11(1)    |
| O6  | 38(1)    | 32(1)    | 50(1)    | -11(1)   | 6(1)     | 1(1)     |
| O7  | 51(1)    | 46(1)    | 35(1)    | 14(1)    | 7(1)     | -10(1)   |
| O8  | 70(2)    | 34(1)    | 41(1)    | 5(1)     | 5(1)     | -15(1)   |
| N1  | 26(1)    | 25(1)    | 26(1)    | 4(1)     | 9(1)     | 4(1)     |
| N2  | 29(1)    | 25(1)    | 28(1)    | 4(1)     | 13(1)    | 6(1)     |
| C1  | 32(1)    | 24(1)    | 29(1)    | 3(1)     | 13(1)    | 5(1)     |
| C2  | 29(1)    | 21(1)    | 24(1)    | 3(1)     | 13(1)    | 2(1)     |
| C3  | 34(1)    | 31(1)    | 27(1)    | 4(1)     | 17(1)    | 3(1)     |
| C4  | 28(1)    | 32(1)    | 33(1)    | 3(1)     | 18(1)    | 2(1)     |
| C5  | 26(1)    | 20(1)    | 29(1)    | 2(1)     | 14(1)    | 2(1)     |
| C6  | 28(1)    | 27(1)    | 29(1)    | 2(1)     | 14(1)    | 1(1)     |
| C7  | 29(1)    | 28(1)    | 27(1)    | 4(1)     | 12(1)    | 3(1)     |
| C8  | 28(1)    | 24(1)    | 25(1)    | 1(1)     | 12(1)    | 2(1)     |
| C9  | 33(1)    | 33(1)    | 28(1)    | 3(1)     | 19(1)    | 5(1)     |
| C10 | 30(1)    | 32(1)    | 32(1)    | 4(1)     | 16(1)    | 5(1)     |
| C11 | 25(1)    | 24(1)    | 26(1)    | 1(1)     | 12(1)    | 2(1)     |
| C12 | 29(1)    | 24(1)    | 30(1)    | 2(1)     | 14(1)    | 2(1)     |
| C13 | 26(1)    | 19(1)    | 25(1)    | 0(1)     | 14(1)    | 1(1)     |
| C14 | 26(1)    | 20(1)    | 24(1)    | 1(1)     | 12(1)    | 0(1)     |
| C15 | 29(1)    | 22(1)    | 29(1)    | 4(1)     | 8(1)     | 4(1)     |
| C16 | 34(1)    | 29(1)    | 32(1)    | 1(1)     | 7(1)     | 5(1)     |
| C17 | 37(2)    | 26(1)    | 34(2)    | 4(1)     | 7(1)     | -3(1)    |
| C18 | 32(1)    | 23(1)    | 30(1)    | -2(1)    | 7(1)     | 1(1)     |
| C19 | 36(2)    | 36(2)    | 37(2)    | -1(1)    | 15(1)    | 5(1)     |
| C20 | 46(2)    | 42(2)    | 36(2)    | 1(1)     | 17(1)    | 2(1)     |
| C21 | 43(2)    | 32(2)    | 36(2)    | 1(1)     | 6(1)     | 2(1)     |

|      |         |        |        |        |       |        |
|------|---------|--------|--------|--------|-------|--------|
| C22  | 30(1)   | 35(2)  | 44(2)  | -6(1)  | 5(1)  | 6(1)   |
| C23  | 33(1)   | 35(2)  | 35(2)  | -7(1)  | 11(1) | -2(1)  |
| C24  | 31(1)   | 29(1)  | 29(1)  | 4(1)   | 10(1) | 6(1)   |
| C25  | 38(2)   | 31(2)  | 35(2)  | 6(1)   | 7(1)  | 4(1)   |
| C26  | 38(2)   | 26(1)  | 38(2)  | -1(1)  | 9(1)  | 2(1)   |
| C27  | 34(1)   | 25(1)  | 31(1)  | -1(1)  | 9(1)  | -1(1)  |
| C28  | 41(2)   | 35(2)  | 33(2)  | -2(1)  | 16(1) | -6(1)  |
| C29  | 48(2)   | 33(2)  | 30(2)  | 5(1)   | 6(1)  | -9(1)  |
| C30  | 38(2)   | 32(2)  | 44(2)  | -1(1)  | 1(1)  | 4(1)   |
| C31  | 30(2)   | 42(2)  | 49(2)  | -5(2)  | 12(1) | 3(1)   |
| C32  | 42(2)   | 36(2)  | 35(2)  | 0(1)   | 18(1) | -3(1)  |
| C33  | 92(7)   | 70(7)  | 94(7)  | -10(6) | 36(6) | -32(6) |
| C34  | 67(7)   | 41(3)  | 91(8)  | -16(4) | 9(7)  | -5(3)  |
| O9   | 66(3)   | 41(2)  | 59(4)  | -18(3) | 19(3) | -3(2)  |
| C35  | 70(4)   | 61(4)  | 90(5)  | -25(3) | 30(4) | 2(3)   |
| C36  | 144(10) | 122(8) | 119(9) | -60(7) | 82(8) | -60(7) |
| C37  | 134(8)  | 122(8) | 91(6)  | -34(6) | 27(5) | 20(6)  |
| C38  | 107(7)  | 112(7) | 91(5)  | -16(5) | 49(5) | -43(6) |
| O10  | 89(3)   | 44(2)  | 54(2)  | -6(2)  | 31(2) | -22(2) |
| C39  | 109(5)  | 46(3)  | 68(4)  | 9(3)   | 9(4)  | -22(3) |
| C40  | 176(11) | 105(7) | 100(7) | -3(5)  | 53(8) | 61(7)  |
| C33' | 92(7)   | 70(7)  | 94(7)  | -10(6) | 36(6) | -32(6) |
| C34' | 67(7)   | 41(3)  | 91(8)  | -16(4) | 9(7)  | -5(3)  |
| O9'  | 66(3)   | 41(2)  | 59(4)  | -18(3) | 19(3) | -3(2)  |
| C35' | 70(4)   | 61(4)  | 90(5)  | -25(3) | 30(4) | 2(3)   |
| C36' | 144(10) | 122(8) | 119(9) | -60(7) | 82(8) | -60(7) |
| C37' | 134(8)  | 122(8) | 91(6)  | -34(6) | 27(5) | 20(6)  |
| C38' | 107(7)  | 112(7) | 91(5)  | -16(5) | 49(5) | -43(6) |
| O10' | 89(3)   | 44(2)  | 54(2)  | -6(2)  | 31(2) | -22(2) |
| C39' | 109(5)  | 46(3)  | 68(4)  | 9(3)   | 9(4)  | -22(3) |
| C40' | 176(11) | 105(7) | 100(7) | -3(5)  | 53(8) | 61(7)  |

---

Table 5. Hydrogen coordinates ( $\times 10^4$ ) and isotropic displacement parameters ( $\text{\AA}^2 \times 10^3$ ) for nilwl03.

|      | x     | y    | z     | U(eq) |
|------|-------|------|-------|-------|
| H6   | -34   | 4695 | 3353  | 64    |
| H8   | 6083  | 1008 | 9343  | 79    |
| H3   | 5239  | 3061 | 2108  | 35    |
| H4   | 7406  | 2630 | 4257  | 35    |
| H9   | 2526  | 2645 | 8882  | 35    |
| H10  | 364   | 3092 | 6730  | 36    |
| H15  | -145  | 3941 | 205   | 33    |
| H17A | -1903 | 3222 | -349  | 41    |
| H17B | -3044 | 3460 | 635   | 41    |
| H19  | -1705 | 3715 | -2907 | 43    |
| H20  | -3451 | 4070 | -5482 | 50    |
| H21  | -6272 | 4354 | -5840 | 48    |
| H22  | -7347 | 4256 | -3616 | 47    |
| H23  | -5610 | 3886 | -1069 | 42    |
| H24  | 9278  | 1784 | 9542  | 36    |
| H26A | 9777  | 2497 | 11233 | 42    |
| H26B | 8684  | 2264 | 12272 | 42    |
| H28  | 10338 | 1863 | 14827 | 43    |
| H29  | 12942 | 1509 | 16675 | 48    |
| H30  | 15258 | 1362 | 15713 | 51    |
| H31  | 15023 | 1615 | 12993 | 49    |
| H32  | 12462 | 1981 | 11182 | 44    |
| H33A | 2924  | 5293 | 5298  | 127   |
| H33B | 2812  | 5845 | 4921  | 127   |
| H33C | 1744  | 5486 | 3418  | 127   |
| H34A | 1020  | 5569 | 6431  | 87    |
| H34B | 4     | 5884 | 4757  | 87    |
| H35A | -2953 | 4965 | 3913  | 88    |
| H35B | -2791 | 5522 | 4026  | 88    |
| H36A | -1381 | 4955 | 6954  | 178   |



|      |       |      |       |     |
|------|-------|------|-------|-----|
| H36B | -3359 | 5160 | 6301  | 178 |
| H36C | -1693 | 5509 | 6905  | 178 |
| H37A | 3076  | 1165 | 9559  | 180 |
| H37B | 1717  | 925  | 10289 | 180 |
| H37C | 1809  | 750  | 8505  | 180 |
| H38A | 4477  | 641  | 11782 | 120 |
| H38B | 3277  | 229  | 10616 | 120 |
| H39A | 5423  | -199 | 10314 | 98  |
| H39B | 6907  | 130  | 11645 | 98  |
| H40A | 6620  | -19  | 8220  | 190 |
| H40B | 7986  | -295 | 9842  | 190 |
| H40C | 8186  | 259  | 9673  | 190 |
| H33D | 2427  | 5420 | 4363  | 127 |
| H33E | 2633  | 5934 | 5181  | 127 |
| H33F | 1349  | 5850 | 3214  | 127 |
| H34C | 638   | 5746 | 6102  | 87  |
| H34D | -726  | 5790 | 4146  | 87  |
| H35C | -730  | 5127 | 6951  | 88  |
| H35D | -1362 | 4675 | 5752  | 88  |
| H36D | -2979 | 5512 | 4397  | 178 |
| H36E | -3508 | 5271 | 5867  | 178 |
| H36F | -3801 | 4995 | 4115  | 178 |
| H37D | 2165  | 401  | 8629  | 180 |
| H37E | 2629  | 887  | 9659  | 180 |
| H37F | 2134  | 436  | 10529 | 180 |
| H38C | 5231  | 630  | 11456 | 120 |
| H38D | 4694  | 94   | 10991 | 120 |
| H39C | 6365  | -48  | 8108  | 98  |
| H39D | 5632  | -268 | 9473  | 98  |
| H40D | 8956  | 51   | 9990  | 190 |
| H40E | 8355  | -342 | 11027 | 190 |
| H40F | 8242  | 201  | 11460 | 190 |

---

Table 6. Torsion angles [°] for nilwl03.

|                |           |                 |           |
|----------------|-----------|-----------------|-----------|
| C12-N1-C1-O2   | 176.4(3)  | C1-N1-C12-O1    | -178.0(3) |
| C15-N1-C1-O2   | -2.2(4)   | C15-N1-C12-O1   | 0.6(4)    |
| C12-N1-C1-C2   | -2.4(4)   | C1-N1-C12-C11   | 2.2(4)    |
| C15-N1-C1-C2   | 179.0(2)  | C15-N1-C12-C11  | -179.1(2) |
| O2-C1-C2-C3    | 2.5(4)    | C10-C11-C12-O1  | -0.6(4)   |
| N1-C1-C2-C3    | -178.7(3) | C13-C11-C12-O1  | 179.7(3)  |
| O2-C1-C2-C13   | -178.0(3) | C10-C11-C12-N1  | 179.1(3)  |
| N1-C1-C2-C13   | 0.8(4)    | C13-C11-C12-N1  | -0.6(4)   |
| C13-C2-C3-C4   | -0.6(4)   | C3-C2-C13-C11   | -179.8(3) |
| C1-C2-C3-C4    | 179.0(3)  | C1-C2-C13-C11   | 0.7(4)    |
| C2-C3-C4-C5    | 0.7(4)    | C3-C2-C13-C14   | 0.3(4)    |
| C3-C4-C5-C14   | -0.6(4)   | C1-C2-C13-C14   | -179.2(2) |
| C3-C4-C5-C6    | 178.9(3)  | C10-C11-C13-C2  | 179.5(3)  |
| C7-N2-C6-O3    | 178.3(3)  | C12-C11-C13-C2  | -0.8(4)   |
| C24-N2-C6-O3   | -0.7(4)   | C10-C11-C13-C14 | -0.6(4)   |
| C7-N2-C6-C5    | -1.7(4)   | C12-C11-C13-C14 | 179.1(2)  |
| C24-N2-C6-C5   | 179.4(2)  | C9-C8-C14-C5    | -179.3(3) |
| C4-C5-C6-O3    | 1.8(4)    | C7-C8-C14-C5    | -1.5(4)   |
| C14-C5-C6-O3   | -178.6(3) | C9-C8-C14-C13   | 0.0(4)    |
| C4-C5-C6-N2    | -178.2(3) | C7-C8-C14-C13   | 177.9(2)  |
| C14-C5-C6-N2   | 1.3(4)    | C4-C5-C14-C8    | 179.8(3)  |
| C6-N2-C7-O4    | 180.0(3)  | C6-C5-C14-C8    | 0.2(4)    |
| C24-N2-C7-O4   | -1.1(4)   | C4-C5-C14-C13   | 0.4(4)    |
| C6-N2-C7-C8    | 0.5(4)    | C6-C5-C14-C13   | -179.1(2) |
| C24-N2-C7-C8   | 179.4(2)  | C2-C13-C14-C8   | -179.6(3) |
| O4-C7-C8-C9    | -0.5(4)   | C11-C13-C14-C8  | 0.5(3)    |
| N2-C7-C8-C9    | 179.1(3)  | C2-C13-C14-C5   | -0.3(3)   |
| O4-C7-C8-C14   | -178.4(3) | C11-C13-C14-C5  | 179.9(2)  |
| N2-C7-C8-C14   | 1.2(4)    | C12-N1-C15-C16  | 51.0(3)   |
| C14-C8-C9-C10  | -0.4(4)   | C1-N1-C15-C16   | -130.2(3) |
| C7-C8-C9-C10   | -178.3(3) | C12-N1-C15-C17  | -76.0(3)  |
| C8-C9-C10-C11  | 0.4(4)    | C1-N1-C15-C17   | 102.7(3)  |
| C9-C10-C11-C13 | 0.1(4)    | N1-C15-C16-O5   | -135.2(3) |
| C9-C10-C11-C12 | -179.5(3) | C17-C15-C16-O5  | -9.1(4)   |

|                 |            |                     |           |
|-----------------|------------|---------------------|-----------|
| N1-C15-C16-O6   | 47.5(3)    | C37-C38-O10-C39     | -167.7(7) |
| C17-C15-C16-O6  | 173.6(3)   | C38-O10-C39-C40     | 175.2(8)  |
| N1-C15-C17-C18  | -163.1(2)  | C33'-C34'-O9'-C35'  | 169(4)    |
| C16-C15-C17-C18 | 71.4(3)    | C34'-O9'-C35'-C36'  | 63(4)     |
| C15-C17-C18-C19 | 70.3(4)    | C37'-C38'-O10'-C39' | -129(6)   |
| C15-C17-C18-C23 | -111.9(3)  | C38'-O10'-C39'-C40' | -85(6)    |
| C23-C18-C19-C20 | 0.8(5)     |                     |           |
| C17-C18-C19-C20 | 178.7(3)   |                     |           |
| C18-C19-C20-C21 | 0.5(5)     |                     |           |
| C19-C20-C21-C22 | -1.1(5)    |                     |           |
| C20-C21-C22-C23 | 0.4(5)     |                     |           |
| C21-C22-C23-C18 | 0.9(5)     |                     |           |
| C19-C18-C23-C22 | -1.5(4)    |                     |           |
| C17-C18-C23-C22 | -179.4(3)  |                     |           |
| C7-N2-C24-C25   | 52.6(4)    |                     |           |
| C6-N2-C24-C25   | -128.4(3)  |                     |           |
| C7-N2-C24-C26   | -74.7(3)   |                     |           |
| C6-N2-C24-C26   | 104.4(3)   |                     |           |
| N2-C24-C25-O7   | -134.7(3)  |                     |           |
| C26-C24-C25-O7  | -8.2(5)    |                     |           |
| N2-C24-C25-O8   | 48.5(4)    |                     |           |
| C26-C24-C25-O8  | 175.0(3)   |                     |           |
| N2-C24-C26-C27  | -164.1(3)  |                     |           |
| C25-C24-C26-C27 | 69.5(4)    |                     |           |
| C24-C26-C27-C28 | -112.8(3)  |                     |           |
| C24-C26-C27-C32 | 67.7(4)    |                     |           |
| C32-C27-C28-C29 | -0.1(5)    |                     |           |
| C26-C27-C28-C29 | -179.5(3)  |                     |           |
| C27-C28-C29-C30 | -1.4(5)    |                     |           |
| C28-C29-C30-C31 | 2.1(5)     |                     |           |
| C29-C30-C31-C32 | -1.4(5)    |                     |           |
| C30-C31-C32-C27 | -0.1(5)    |                     |           |
| C28-C27-C32-C31 | 0.8(5)     |                     |           |
| C26-C27-C32-C31 | -179.7(3)  |                     |           |
| C33-C34-O9-C35  | -171.3(11) |                     |           |
| C34-O9-C35-C36  | -63.1(13)  |                     |           |

Table 7. Hydrogen bonds and close contacts for nilwl03 [ $\text{\AA}$  and  $^\circ$ ].

---

| D-H...A      | d(D-H) | d(H...A) | d(D...A) | <(DHA) |
|--------------|--------|----------|----------|--------|
| O6-H6...O9   | 0.84   | 1.80     | 2.640(7) | 176.3  |
| O6-H6...O9'  | 0.84   | 1.82     | 2.63(2)  | 161.6  |
| O8-H8...O10  | 0.84   | 1.81     | 2.646(5) | 174.9  |
| O8-H8...O10' | 0.84   | 1.75     | 2.55(3)  | 156.7  |

---

**Appendix 2. Crystal Structure Report for 3a**

REFERENCE NUMBER: nilwl05

## CRYSTAL STRUCTURE REPORT

 $C_{50}H_{58}Cl_4N_6O_{10}$ 

or

 $C_{48}H_{54}N_6O_{10} \cdot CH_2Cl_2$ 

Report prepared for:

W. Liyanage, Prof. B. Nilsson

February 27, 2012

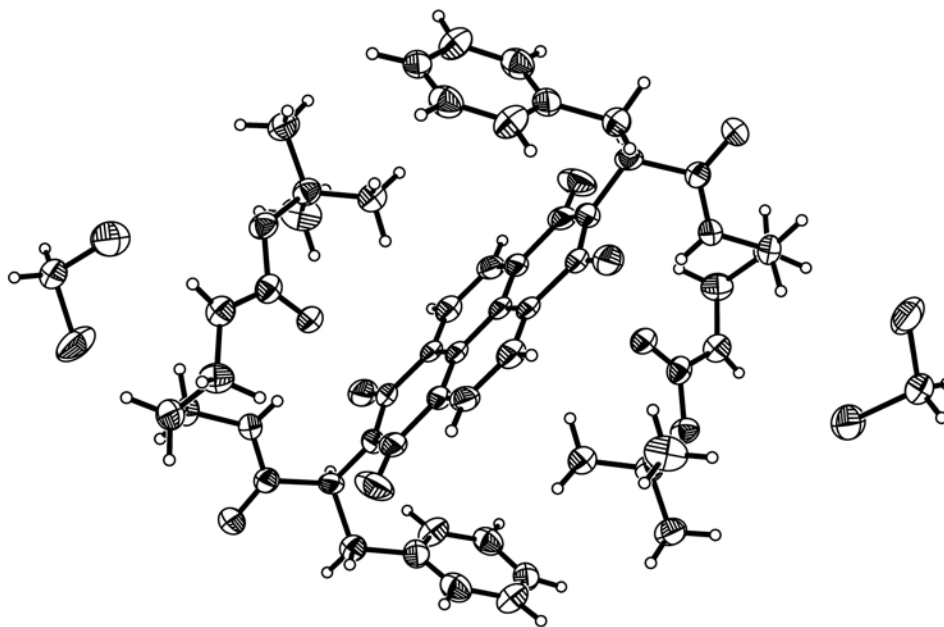

William W. Brennessel

X-ray Crystallographic Facility

Department of Chemistry, University of Rochester

120 Trustee Road

Rochester, NY 14627

### Data collection

A crystal (0.28 x 0.24 x 0.10 mm<sup>3</sup>) was placed onto the tip of a 0.1 mm diameter glass capillary tube or fiber and mounted on a Bruker SMART APEX II CCD Platform diffractometer for a data collection at 100.0(5) K.<sup>1</sup> A preliminary set of cell constants and an orientation matrix were calculated from reflections harvested from three orthogonal wedges of reciprocal space. The full data collection was carried out using MoK $\alpha$  radiation (graphite monochromator) with a frame time of 60 seconds and a detector distance of 4.01 cm. A randomly oriented region of reciprocal space was surveyed: six major sections of frames were collected with 0.50° steps in  $\omega$  at six different  $\phi$  settings and a detector position of -38° in  $2\theta$ . The intensity data were corrected for absorption.<sup>2</sup> Final cell constants were calculated from the xyz centroids of 4082 strong reflections from the actual data collection after integration.<sup>3</sup> See Table 1 for additional crystal and refinement information.

### Structure solution and refinement

The structure was solved using SIR97<sup>4</sup> and refined using SHELXL-97.<sup>5</sup> The space group  $P2_1/c$  was determined based on systematic absences. A direct-methods solution was calculated which provided most non-hydrogen atoms from the E-map. Full-matrix least squares / difference Fourier cycles were performed which located the remaining non-hydrogen atoms. All non-hydrogen atoms were refined with anisotropic displacement parameters. The positional parameters for the amine hydrogen atoms were refined independently from those of their respective bonded nitrogen atoms. All other hydrogen atoms were placed in ideal positions and refined as riding atoms with relative isotropic displacement parameters. The final full matrix least squares refinement converged to  $R1 = 0.0652$  ( $F^2$ ,  $I > 2\sigma(I)$ ) and  $wR2 = 0.1421$  ( $F^2$ , all data).

### Structure description

The structure is the one suggested. The molecule lies in a crystallographic inversion center, and thus one half is unique. The benzyl moiety is modeled as disordered over two positions (50:50, due to the nearby crystallographic inversion center). There are also two (one unique) cocrystallized dichloromethane solvent molecules per featured molecule. Intermolecular hydrogen bonding links neighboring molecules and intramolecular hydrogen bonding is present within each molecule (see diagram and Table 7). The long chains may be oriented such that the C=O group is aimed at the electropositive center of the aromatic rings (see diagram, distance 2.95 Å).

Unless noted otherwise all structural diagrams containing thermal displacement ellipsoids are drawn at the 50 % probability level.

Data collection, structure solution, and structure refinement were conducted at the X-ray Crystallographic Facility, B51 Hutchison Hall, Department of Chemistry, University of Rochester. All publications arising from this report MUST either 1) include William W. Brennessel as a coauthor or 2) acknowledge William W. Brennessel and the X-ray Crystallographic Facility of the Department of Chemistry at the University of Rochester.

- <sup>1</sup> *APEX2*, version 2011.4-1; Bruker AXS: Madison, WI, 2011.
- <sup>2</sup> Sheldrick, G. M. *SADABS*, version 2008/1; University of Göttingen: Göttingen, Germany, 2008.
- <sup>3</sup> *SAINTE*, version 7.68A; Bruker AXS: Madison, WI, 2009.
- <sup>4</sup> Altomare, A.; Burla, M. C.; Camalli, M.; Cascarano, G. L.; Giacovazzo, C.; Guagliardi, A.; Moliterni, A. G. G.; Polidori, G.; Spagna, R. *SIR97: A new program for solving and refining crystal structures*; Istituto di Cristallografia, CNR: Bari, Italy, 1999.
- <sup>5</sup> Sheldrick, G. M. *Acta. Cryst.* **2008**, *A64*, 112-122.

Some equations of interest:

$$R_{\text{int}} = \Sigma |F_o^2 - \langle F_o^2 \rangle| / \Sigma |F_o^2|$$

$$R1 = \Sigma ||F_o| - |F_c|| / \Sigma |F_o|$$

$$wR2 = [\Sigma [w(F_o^2 - F_c^2)^2] / \Sigma [w(F_o^2)^2]]^{1/2}$$

where  $w = 1 / [\sigma^2 (F_o^2) + (aP)^2 + bP]$  and

$$P = 1/3 \max (0, F_o^2) + 2/3 F_c^2$$

$$\text{GOF} = S = [\Sigma [w(F_o^2 - F_c^2)^2] / (m-n)]^{1/2}$$

where  $m$  = number of reflections and  $n$  = number of parameters

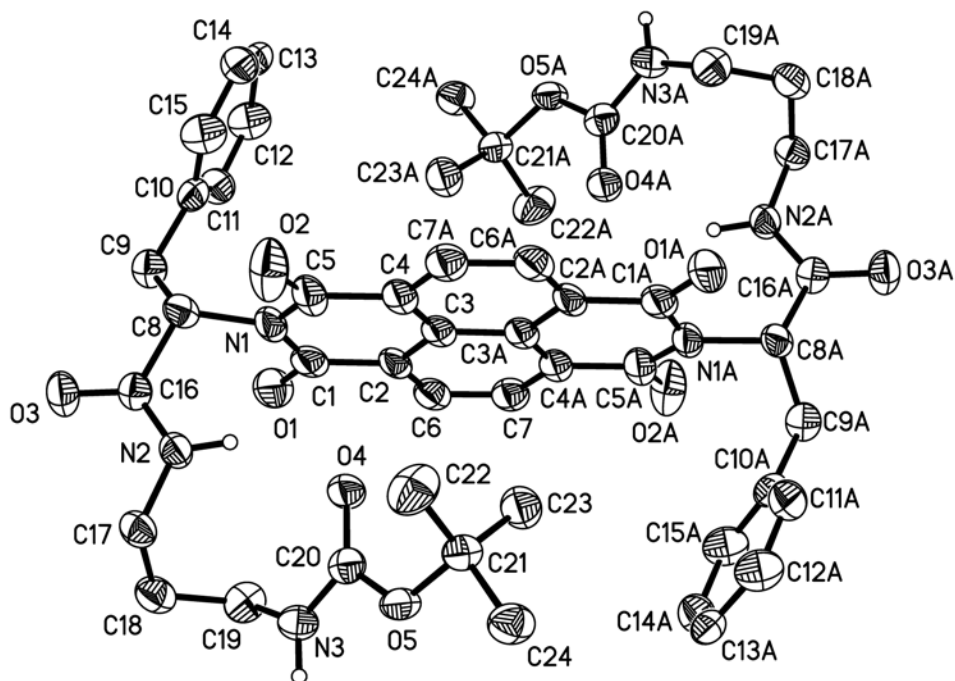

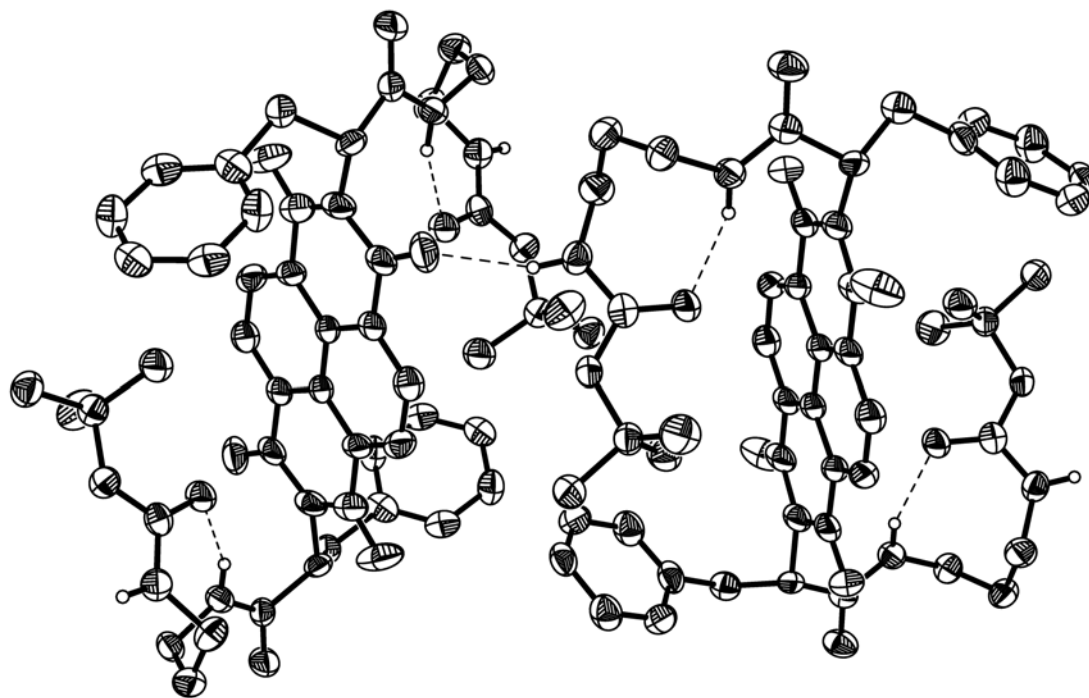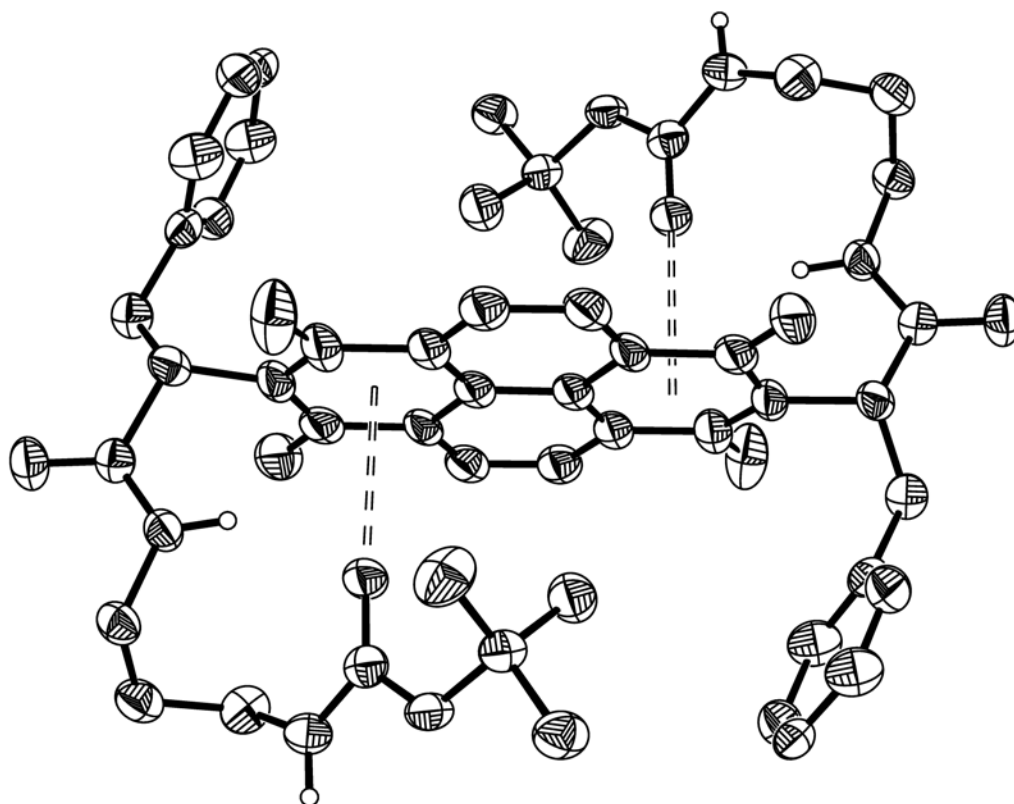



Table 1. Crystal data and structure refinement for nilwl05.

|                                                     |                                                                                |                            |
|-----------------------------------------------------|--------------------------------------------------------------------------------|----------------------------|
| Identification code                                 | nilwl05                                                                        |                            |
| Empirical formula                                   | C <sub>50</sub> H <sub>58</sub> Cl <sub>4</sub> N <sub>6</sub> O <sub>10</sub> |                            |
| Formula weight                                      | 1044.82                                                                        |                            |
| Temperature                                         | 100.0(5) K                                                                     |                            |
| Wavelength                                          | 0.71073 Å                                                                      |                            |
| Crystal system                                      | Monoclinic                                                                     |                            |
| Space group                                         | <i>P</i> 2 <sub>1</sub> / <i>c</i>                                             |                            |
| Unit cell dimensions                                | <i>a</i> = 14.567(3) Å                                                         | $\alpha = 90^\circ$        |
|                                                     | <i>b</i> = 15.967(3) Å                                                         | $\beta = 109.917(3)^\circ$ |
|                                                     | <i>c</i> = 11.502(2) Å                                                         | $\gamma = 90^\circ$        |
| Volume                                              | 2515.2(9) Å <sup>3</sup>                                                       |                            |
| <i>Z</i>                                            | 2                                                                              |                            |
| Density (calculated)                                | 1.380 Mg/m <sup>3</sup>                                                        |                            |
| Absorption coefficient                              | 0.299 mm <sup>-1</sup>                                                         |                            |
| <i>F</i> (000)                                      | 1096                                                                           |                            |
| Crystal color, morphology                           | colorless, plate                                                               |                            |
| Crystal size                                        | 0.28 x 0.24 x 0.10 mm <sup>3</sup>                                             |                            |
| Theta range for data collection                     | 1.96 to 25.02°                                                                 |                            |
| Index ranges                                        | -17 ≤ <i>h</i> ≤ 17, -19 ≤ <i>k</i> ≤ 19, -13 ≤ <i>l</i> ≤ 13                  |                            |
| Reflections collected                               | 37000                                                                          |                            |
| Independent reflections                             | 4440 [ <i>R</i> (int) = 0.1261]                                                |                            |
| Observed reflections                                | 2717                                                                           |                            |
| Completeness to theta = 25.02°                      | 100.0%                                                                         |                            |
| Absorption correction                               | Multi-scan                                                                     |                            |
| Max. and min. transmission                          | 0.9707 and 0.9208                                                              |                            |
| Refinement method                                   | Full-matrix least-squares on <i>F</i> <sup>2</sup>                             |                            |
| Data / restraints / parameters                      | 4440 / 19 / 331                                                                |                            |
| Goodness-of-fit on <i>F</i> <sup>2</sup>            | 1.080                                                                          |                            |
| Final <i>R</i> indices [ <i>I</i> > 2σ( <i>I</i> )] | <i>R</i> 1 = 0.0652, <i>wR</i> 2 = 0.1236                                      |                            |
| <i>R</i> indices (all data)                         | <i>R</i> 1 = 0.1167, <i>wR</i> 2 = 0.1421                                      |                            |
| Largest diff. peak and hole                         | 0.311 and -0.473 e.Å <sup>-3</sup>                                             |                            |

Table 2. Atomic coordinates ( $\times 10^4$ ) and equivalent isotropic displacement parameters ( $\text{\AA}^2 \times 10^3$ ) for nilwl05.  $U_{\text{eq}}$  is defined as one third of the trace of the orthogonalized  $U_{ij}$  tensor.

|      | x        | y       | z         | $U_{\text{eq}}$ |
|------|----------|---------|-----------|-----------------|
| O1   | 2780(2)  | 5168(2) | 2659(3)   | 65(1)           |
| O2   | 2277(2)  | 4480(2) | -1319(4)  | 64(1)           |
| O3   | 5010(2)  | 4107(2) | 1815(3)   | 46(1)           |
| O4   | 1538(2)  | 3125(2) | 974(3)    | 41(1)           |
| O5   | 829(2)   | 1838(2) | 843(2)    | 36(1)           |
| N1   | 2537(2)  | 4910(2) | 641(4)    | 44(1)           |
| N2   | 3562(3)  | 3453(2) | 1401(3)   | 36(1)           |
| N3   | 2159(3)  | 2114(2) | 2419(3)   | 38(1)           |
| C1   | 2204(3)  | 5065(3) | 1626(5)   | 48(1)           |
| C2   | 1139(3)  | 5116(2) | 1344(4)   | 38(1)           |
| C3   | 505(3)   | 4975(2) | 129(4)    | 34(1)           |
| C4   | 870(3)   | 4774(2) | -818(4)   | 39(1)           |
| C5   | 1929(3)  | 4703(3) | -556(5)   | 47(1)           |
| C6   | 768(3)   | 5297(3) | 2258(4)   | 42(1)           |
| C7   | -234(3)  | 5364(3) | 2000(4)   | 43(1)           |
| C8   | 3584(5)  | 4873(5) | 684(10)   | 36(3)           |
| C9   | 4143(6)  | 5676(5) | 1228(8)   | 39(2)           |
| C10  | 3630(8)  | 6458(6) | 584(10)   | 42(1)           |
| C11  | 3518(11) | 7110(7) | 1303(10)  | 47(2)           |
| C12  | 3130(17) | 7869(8) | 779(16)   | 48(2)           |
| C13  | 2883(9)  | 7982(8) | -485(17)  | 42(1)           |
| C14  | 2935(7)  | 7314(7) | -1210(13) | 47(2)           |
| C15  | 3346(9)  | 6565(7) | -662(10)  | 48(2)           |
| C8'  | 3628(5)  | 4971(5) | 1145(11)  | 36(3)           |
| C9'  | 3938(6)  | 5488(5) | 259(8)    | 39(2)           |
| C10' | 3488(9)  | 6356(5) | 29(10)    | 42(1)           |
| C11' | 3646(11) | 6940(7) | 955(10)   | 47(2)           |
| C12' | 3272(17) | 7741(8) | 715(16)   | 48(2)           |
| C13' | 2680(9)  | 7961(8) | -461(17)  | 42(1)           |
| C14' | 2552(7)  | 7385(7) | -1390(12) | 47(2)           |
| C15' | 2935(8)  | 6588(6) | -1133(9)  | 48(2)           |

|     |         |         |          |       |
|-----|---------|---------|----------|-------|
| C16 | 4122(3) | 4115(3) | 1430(4)  | 34(1) |
| C17 | 3949(3) | 2641(2) | 1882(4)  | 37(1) |
| C18 | 3921(3) | 2472(3) | 3151(4)  | 44(1) |
| C19 | 2925(3) | 2622(3) | 3269(4)  | 44(1) |
| C20 | 1518(3) | 2422(3) | 1382(4)  | 35(1) |
| C21 | 61(3)   | 2000(3) | -350(4)  | 36(1) |
| C22 | 518(4)  | 2139(3) | -1326(4) | 59(1) |
| C23 | -560(3) | 2728(3) | -219(4)  | 50(1) |
| C24 | -513(3) | 1192(3) | -574(4)  | 46(1) |
| C25 | 3792(3) | 15(3)   | 614(4)   | 45(1) |
| CI1 | 2662(1) | 339(1)  | 705(1)   | 68(1) |
| CI2 | 4537(1) | 862(1)  | 575(2)   | 80(1) |

---

Table 3. Bond lengths [Å] and angles [°] for nilwl05.

|             |           |               |           |
|-------------|-----------|---------------|-----------|
| O(1)-C(1)   | 1.209(5)  | C(10)-C(11)   | 1.374(11) |
| O(2)-C(5)   | 1.208(5)  | C(11)-C(12)   | 1.386(12) |
| O(3)-C(16)  | 1.216(4)  | C(11)-H(11)   | 0.9500    |
| O(4)-C(20)  | 1.220(5)  | C(12)-C(13)   | 1.385(12) |
| O(5)-C(20)  | 1.356(5)  | C(12)-H(12)   | 0.9500    |
| O(5)-C(21)  | 1.469(5)  | C(13)-C(14)   | 1.372(11) |
| N(1)-C(1)   | 1.398(6)  | C(13)-H(13)   | 0.9500    |
| N(1)-C(5)   | 1.399(6)  | C(14)-C(15)   | 1.389(12) |
| N(1)-C(8')  | 1.498(7)  | C(14)-H(14)   | 0.9500    |
| N(1)-C(8)   | 1.510(8)  | C(15)-H(15)   | 0.9500    |
| N(2)-C(16)  | 1.329(5)  | C(8')-C(9')   | 1.495(11) |
| N(2)-C(17)  | 1.446(5)  | C(8')-C(16)   | 1.528(8)  |
| N(2)-H(2)   | 0.88(4)   | C(8')-H(8')   | 1.0000    |
| N(3)-C(20)  | 1.333(5)  | C(9')-C(10')  | 1.518(10) |
| N(3)-C(19)  | 1.454(5)  | C(9')-H(9C)   | 0.9900    |
| N(3)-H(3)   | 0.86(4)   | C(9')-H(9D)   | 0.9900    |
| C(1)-C(2)   | 1.475(6)  | C(10')-C(15') | 1.356(11) |
| C(2)-C(6)   | 1.367(6)  | C(10')-C(11') | 1.375(12) |
| C(2)-C(3)   | 1.406(5)  | C(11')-C(12') | 1.380(11) |
| C(3)-C(3)#1 | 1.401(8)  | C(11')-H(11') | 0.9500    |
| C(3)-C(4)   | 1.402(6)  | C(12')-C(13') | 1.379(12) |
| C(4)-C(7)#1 | 1.377(6)  | C(12')-H(12') | 0.9500    |
| C(4)-C(5)   | 1.471(6)  | C(13')-C(14') | 1.374(12) |
| C(6)-C(7)   | 1.391(6)  | C(13')-H(13') | 0.9500    |
| C(6)-H(6)   | 0.9500    | C(14')-C(15') | 1.381(11) |
| C(7)-C(4)#1 | 1.377(6)  | C(14')-H(14') | 0.9500    |
| C(7)-H(7)   | 0.9500    | C(15')-H(15') | 0.9500    |
| C(8)-C(9)   | 1.534(11) | C(17)-C(18)   | 1.499(5)  |
| C(8)-C(16)  | 1.535(8)  | C(17)-H(17A)  | 0.9900    |
| C(8)-H(8)   | 1.0000    | C(17)-H(17B)  | 0.9900    |
| C(9)-C(10)  | 1.513(10) | C(18)-C(19)   | 1.521(6)  |
| C(9)-H(9A)  | 0.9900    | C(18)-H(18A)  | 0.9900    |
| C(9)-H(9B)  | 0.9900    | C(18)-H(18B)  | 0.9900    |
| C(10)-C(15) | 1.359(12) | C(19)-H(19A)  | 0.9900    |

|                  |          |                   |           |
|------------------|----------|-------------------|-----------|
| C(19)-H(19B)     | 0.9900   | C(3)#1-C(3)-C(2)  | 119.3(5)  |
| C(21)-C(22)      | 1.504(6) | C(4)-C(3)-C(2)    | 120.9(4)  |
| C(21)-C(24)      | 1.511(6) | C(7)#1-C(4)-C(3)  | 119.8(4)  |
| C(21)-C(23)      | 1.511(6) | C(7)#1-C(4)-C(5)  | 119.7(4)  |
| C(22)-H(22A)     | 0.9800   | C(3)-C(4)-C(5)    | 120.4(4)  |
| C(22)-H(22B)     | 0.9800   | O(2)-C(5)-N(1)    | 120.1(4)  |
| C(22)-H(22C)     | 0.9800   | O(2)-C(5)-C(4)    | 123.0(4)  |
| C(23)-H(23A)     | 0.9800   | N(1)-C(5)-C(4)    | 116.9(4)  |
| C(23)-H(23B)     | 0.9800   | C(2)-C(6)-C(7)    | 120.9(4)  |
| C(23)-H(23C)     | 0.9800   | C(2)-C(6)-H(6)    | 119.6     |
| C(24)-H(24A)     | 0.9800   | C(7)-C(6)-H(6)    | 119.6     |
| C(24)-H(24B)     | 0.9800   | C(4)#1-C(7)-C(6)  | 120.2(4)  |
| C(24)-H(24C)     | 0.9800   | C(4)#1-C(7)-H(7)  | 119.9     |
| C(25)-Cl(2)      | 1.745(4) | C(6)-C(7)-H(7)    | 119.9     |
| C(25)-Cl(1)      | 1.761(4) | N(1)-C(8)-C(9)    | 111.7(7)  |
| C(25)-H(25A)     | 0.9900   | N(1)-C(8)-C(16)   | 111.6(5)  |
| C(25)-H(25B)     | 0.9900   | C(9)-C(8)-C(16)   | 109.4(6)  |
| C(20)-O(5)-C(21) | 121.0(3) | N(1)-C(8)-H(8)    | 108.0     |
| C(1)-N(1)-C(5)   | 124.1(4) | C(9)-C(8)-H(8)    | 108.0     |
| C(1)-N(1)-C(8')  | 106.8(6) | C(16)-C(8)-H(8)   | 108.0     |
| C(5)-N(1)-C(8')  | 129.0(6) | C(10)-C(9)-C(8)   | 112.7(7)  |
| C(1)-N(1)-C(8)   | 127.3(5) | C(10)-C(9)-H(9A)  | 109.1     |
| C(5)-N(1)-C(8)   | 108.5(6) | C(8)-C(9)-H(9A)   | 109.1     |
| C(16)-N(2)-C(17) | 123.2(3) | C(10)-C(9)-H(9B)  | 109.1     |
| C(16)-N(2)-H(2)  | 121(3)   | C(8)-C(9)-H(9B)   | 109.1     |
| C(17)-N(2)-H(2)  | 115(3)   | H(9A)-C(9)-H(9B)  | 107.8     |
| C(20)-N(3)-C(19) | 122.7(4) | C(15)-C(10)-C(11) | 118.9(8)  |
| C(20)-N(3)-H(3)  | 117(3)   | C(15)-C(10)-C(9)  | 122.8(10) |
| C(19)-N(3)-H(3)  | 120(3)   | C(11)-C(10)-C(9)  | 118.1(9)  |
| O(1)-C(1)-N(1)   | 120.3(4) | C(10)-C(11)-C(12) | 121.0(9)  |
| O(1)-C(1)-C(2)   | 122.3(5) | C(10)-C(11)-H(11) | 119.5     |
| N(1)-C(1)-C(2)   | 117.4(4) | C(12)-C(11)-H(11) | 119.5     |
| C(6)-C(2)-C(3)   | 120.0(4) | C(13)-C(12)-C(11) | 119.5(10) |
| C(6)-C(2)-C(1)   | 120.3(4) | C(13)-C(12)-H(12) | 120.3     |
| C(3)-C(2)-C(1)   | 119.7(4) | C(11)-C(12)-H(12) | 120.3     |
| C(3)#1-C(3)-C(4) | 119.8(5) | C(14)-C(13)-C(12) | 119.2(11) |

|                      |           |                      |          |
|----------------------|-----------|----------------------|----------|
| C(14)-C(13)-H(13)    | 120.4     | C(10')-C(15')-H(15') | 119.3    |
| C(12)-C(13)-H(13)    | 120.4     | C(14')-C(15')-H(15') | 119.3    |
| C(13)-C(14)-C(15)    | 119.8(10) | O(3)-C(16)-N(2)      | 124.7(4) |
| C(13)-C(14)-H(14)    | 120.1     | O(3)-C(16)-C(8')     | 116.8(4) |
| C(15)-C(14)-H(14)    | 120.1     | N(2)-C(16)-C(8')     | 117.8(4) |
| C(10)-C(15)-C(14)    | 121.1(9)  | O(3)-C(16)-C(8)      | 119.3(4) |
| C(10)-C(15)-H(15)    | 119.5     | N(2)-C(16)-C(8)      | 114.9(4) |
| C(14)-C(15)-H(15)    | 119.5     | N(2)-C(17)-C(18)     | 113.5(3) |
| C(9')-C(8')-N(1)     | 107.4(6)  | N(2)-C(17)-H(17A)    | 108.9    |
| C(9')-C(8')-C(16)    | 114.3(7)  | C(18)-C(17)-H(17A)   | 108.9    |
| N(1)-C(8')-C(16)     | 112.6(5)  | N(2)-C(17)-H(17B)    | 108.9    |
| C(9')-C(8')-H(8')    | 107.4     | C(18)-C(17)-H(17B)   | 108.9    |
| N(1)-C(8')-H(8')     | 107.4     | H(17A)-C(17)-H(17B)  | 107.7    |
| C(16)-C(8')-H(8')    | 107.4     | C(17)-C(18)-C(19)    | 113.7(3) |
| C(8')-C(9')-C(10')   | 114.2(7)  | C(17)-C(18)-H(18A)   | 108.8    |
| C(8')-C(9')-H(9C)    | 108.7     | C(19)-C(18)-H(18A)   | 108.8    |
| C(10')-C(9')-H(9C)   | 108.7     | C(17)-C(18)-H(18B)   | 108.8    |
| C(8')-C(9')-H(9D)    | 108.7     | C(19)-C(18)-H(18B)   | 108.8    |
| C(10')-C(9')-H(9D)   | 108.7     | H(18A)-C(18)-H(18B)  | 107.7    |
| H(9C)-C(9')-H(9D)    | 107.6     | N(3)-C(19)-C(18)     | 112.9(4) |
| C(15')-C(10')-C(11') | 117.8(8)  | N(3)-C(19)-H(19A)    | 109.0    |
| C(15')-C(10')-C(9')  | 119.8(9)  | C(18)-C(19)-H(19A)   | 109.0    |
| C(11')-C(10')-C(9')  | 122.4(9)  | N(3)-C(19)-H(19B)    | 109.0    |
| C(10')-C(11')-C(12') | 121.5(10) | C(18)-C(19)-H(19B)   | 109.0    |
| C(10')-C(11')-H(11') | 119.3     | H(19A)-C(19)-H(19B)  | 107.8    |
| C(12')-C(11')-H(11') | 119.3     | O(4)-C(20)-N(3)      | 125.6(4) |
| C(13')-C(12')-C(11') | 120.4(11) | O(4)-C(20)-O(5)      | 124.6(4) |
| C(13')-C(12')-H(12') | 119.8     | N(3)-C(20)-O(5)      | 109.8(4) |
| C(11')-C(12')-H(12') | 119.8     | O(5)-C(21)-C(22)     | 109.5(3) |
| C(14')-C(13')-C(12') | 117.7(10) | O(5)-C(21)-C(24)     | 102.1(3) |
| C(14')-C(13')-H(13') | 121.1     | C(22)-C(21)-C(24)    | 111.0(4) |
| C(12')-C(13')-H(13') | 121.1     | O(5)-C(21)-C(23)     | 109.5(3) |
| C(13')-C(14')-C(15') | 120.9(10) | C(22)-C(21)-C(23)    | 113.2(4) |
| C(13')-C(14')-H(14') | 119.5     | C(24)-C(21)-C(23)    | 111.1(4) |
| C(15')-C(14')-H(14') | 119.5     | C(21)-C(22)-H(22A)   | 109.5    |
| C(10')-C(15')-C(14') | 121.5(9)  | C(21)-C(22)-H(22B)   | 109.5    |

|                     |       |                     |          |
|---------------------|-------|---------------------|----------|
| H(22A)-C(22)-H(22B) | 109.5 | C(21)-C(24)-H(24B)  | 109.5    |
| C(21)-C(22)-H(22C)  | 109.5 | H(24A)-C(24)-H(24B) | 109.5    |
| H(22A)-C(22)-H(22C) | 109.5 | C(21)-C(24)-H(24C)  | 109.5    |
| H(22B)-C(22)-H(22C) | 109.5 | H(24A)-C(24)-H(24C) | 109.5    |
| C(21)-C(23)-H(23A)  | 109.5 | H(24B)-C(24)-H(24C) | 109.5    |
| C(21)-C(23)-H(23B)  | 109.5 | Cl(2)-C(25)-Cl(1)   | 112.0(2) |
| H(23A)-C(23)-H(23B) | 109.5 | Cl(2)-C(25)-H(25A)  | 109.2    |
| C(21)-C(23)-H(23C)  | 109.5 | Cl(1)-C(25)-H(25A)  | 109.2    |
| H(23A)-C(23)-H(23C) | 109.5 | Cl(2)-C(25)-H(25B)  | 109.2    |
| H(23B)-C(23)-H(23C) | 109.5 | Cl(1)-C(25)-H(25B)  | 109.2    |
| C(21)-C(24)-H(24A)  | 109.5 | H(25A)-C(25)-H(25B) | 107.9    |

---

Symmetry transformations used to generate equivalent atoms:

#1 -x,-y+1,-z

Table 4. Anisotropic displacement parameters ( $\text{\AA}^2 \times 10^3$ ) for nilwl05. The anisotropic displacement factor exponent takes the form:  $-2\pi^2 [ h^2 a^{*2} U_{11} + \dots + 2 h k a^* b^* U_{12} ]$

|      | $U_{11}$ | $U_{22}$ | $U_{33}$ | $U_{23}$ | $U_{13}$ | $U_{12}$ |
|------|----------|----------|----------|----------|----------|----------|
| O1   | 40(2)    | 72(3)    | 60(2)    | 20(2)    | -10(2)   | -16(2)   |
| O2   | 42(2)    | 47(2)    | 103(3)   | -34(2)   | 25(2)    | -2(2)    |
| O3   | 30(2)    | 42(2)    | 63(2)    | -6(2)    | 11(2)    | 2(1)     |
| O4   | 38(2)    | 28(2)    | 54(2)    | 5(1)     | 10(1)    | -2(1)    |
| O5   | 42(2)    | 31(2)    | 34(2)    | 6(1)     | 9(1)     | -5(1)    |
| N1   | 28(2)    | 26(2)    | 68(3)    | 10(2)    | 4(2)     | -1(2)    |
| N2   | 31(2)    | 30(2)    | 43(2)    | 2(2)     | 9(2)     | 2(2)     |
| N3   | 46(2)    | 36(2)    | 32(2)    | 2(2)     | 14(2)    | 0(2)     |
| C1   | 39(3)    | 26(2)    | 65(3)    | 14(2)    | 0(3)     | -7(2)    |
| C2   | 31(2)    | 22(2)    | 50(3)    | 8(2)     | -1(2)    | -2(2)    |
| C3   | 34(2)    | 15(2)    | 44(2)    | 1(2)     | 4(2)     | -2(2)    |
| C4   | 34(2)    | 15(2)    | 59(3)    | 3(2)     | 4(2)     | -3(2)    |
| C5   | 32(2)    | 19(2)    | 78(4)    | 3(2)     | 5(2)     | 0(2)     |
| C6   | 41(3)    | 30(2)    | 44(3)    | 5(2)     | -2(2)    | -7(2)    |
| C7   | 47(3)    | 29(2)    | 51(3)    | 2(2)     | 13(2)    | -2(2)    |
| C8   | 31(3)    | 30(3)    | 35(8)    | 1(4)     | -3(3)    | -6(2)    |
| C9   | 38(3)    | 36(4)    | 43(4)    | -5(3)    | 13(3)    | 0(3)     |
| C10  | 33(3)    | 36(2)    | 60(3)    | 11(2)    | 21(3)    | -1(2)    |
| C11  | 40(4)    | 55(3)    | 40(4)    | 7(2)     | 7(3)     | -2(4)    |
| C12  | 63(6)    | 35(3)    | 49(3)    | -6(3)    | 21(3)    | -5(3)    |
| C13  | 33(3)    | 36(2)    | 60(3)    | 11(2)    | 21(3)    | -1(2)    |
| C14  | 40(4)    | 55(3)    | 40(4)    | 7(2)     | 7(3)     | -2(4)    |
| C15  | 63(6)    | 35(3)    | 49(3)    | -6(3)    | 21(3)    | -5(3)    |
| C8'  | 31(3)    | 30(3)    | 35(8)    | 1(4)     | -3(3)    | -6(2)    |
| C9'  | 38(3)    | 36(4)    | 43(4)    | -5(3)    | 13(3)    | 0(3)     |
| C10' | 33(3)    | 36(2)    | 60(3)    | 11(2)    | 21(3)    | -1(2)    |
| C11' | 40(4)    | 55(3)    | 40(4)    | 7(2)     | 7(3)     | -2(4)    |
| C12' | 63(6)    | 35(3)    | 49(3)    | -6(3)    | 21(3)    | -5(3)    |
| C13' | 33(3)    | 36(2)    | 60(3)    | 11(2)    | 21(3)    | -1(2)    |
| C14' | 40(4)    | 55(3)    | 40(4)    | 7(2)     | 7(3)     | -2(4)    |
| C15' | 63(6)    | 35(3)    | 49(3)    | -6(3)    | 21(3)    | -5(3)    |



|     |       |       |        |        |       |        |
|-----|-------|-------|--------|--------|-------|--------|
| C16 | 33(2) | 31(2) | 37(2)  | -6(2)  | 12(2) | 0(2)   |
| C17 | 39(2) | 31(2) | 42(2)  | 1(2)   | 14(2) | 8(2)   |
| C18 | 44(3) | 41(3) | 39(2)  | 5(2)   | 6(2)  | 3(2)   |
| C19 | 48(3) | 50(3) | 33(2)  | -5(2)  | 12(2) | -7(2)  |
| C20 | 40(2) | 33(3) | 37(2)  | -1(2)  | 20(2) | 3(2)   |
| C21 | 41(2) | 34(2) | 35(2)  | 2(2)   | 13(2) | -2(2)  |
| C22 | 64(3) | 83(4) | 35(3)  | -1(3)  | 24(2) | -15(3) |
| C23 | 43(3) | 36(3) | 65(3)  | 1(2)   | 9(2)  | -1(2)  |
| C24 | 52(3) | 37(3) | 44(3)  | 0(2)   | 9(2)  | -6(2)  |
| C25 | 48(3) | 36(3) | 52(3)  | -1(2)  | 17(2) | 2(2)   |
| CI1 | 61(1) | 65(1) | 88(1)  | -22(1) | 40(1) | -4(1)  |
| CI2 | 84(1) | 37(1) | 146(2) | -21(1) | 74(1) | -9(1)  |

---

Table 5. Hydrogen coordinates ( $\times 10^4$ ) and isotropic displacement parameters ( $\text{\AA}^2 \times 10^3$ ) for nilwl05.

|      | x        | y        | z        | U(eq) |
|------|----------|----------|----------|-------|
| H2   | 2930(30) | 3510(30) | 1230(40) | 43    |
| H3   | 2070(30) | 1610(30) | 2620(40) | 45    |
| H6   | 1201     | 5378     | 3081     | 51    |
| H7   | -480     | 5506     | 2640     | 51    |
| H8   | 3581     | 4812     | -183     | 43    |
| H9A  | 4224     | 5710     | 2117     | 47    |
| H9B  | 4802     | 5650     | 1160     | 47    |
| H11  | 3710     | 7040     | 2173     | 56    |
| H12  | 3033     | 8309     | 1282     | 58    |
| H13  | 2680     | 8516     | -846     | 50    |
| H14  | 2691     | 7364     | -2086    | 56    |
| H15  | 3429     | 6120     | -1165    | 58    |
| H8'  | 3808     | 5288     | 1941     | 43    |
| H9C  | 3760     | 5187     | -540     | 47    |
| H9D  | 4657     | 5545     | 583      | 47    |
| H11' | 4020     | 6789     | 1780     | 56    |
| H12' | 3423     | 8142     | 1362     | 58    |
| H13' | 2370     | 8494     | -622     | 50    |
| H14' | 2196     | 7537     | -2220    | 56    |
| H15' | 2807     | 6192     | -1786    | 58    |
| H17A | 4634     | 2603     | 1906     | 45    |
| H17B | 3570     | 2202     | 1311     | 45    |
| H18A | 4407     | 2835     | 3751     | 52    |
| H18B | 4114     | 1882     | 3373     | 52    |
| H19A | 2963     | 2495     | 4127     | 53    |
| H19B | 2752     | 3221     | 3111     | 53    |
| H22A | 908      | 2653     | -1142    | 88    |
| H22B | 4        | 2191     | -2136    | 88    |
| H22C | 939      | 1663     | -1337    | 88    |
| H23A | -162     | 3238     | -28      | 76    |

|      |       |      |       |    |
|------|-------|------|-------|----|
| H23B | -814  | 2612 | 452   | 76 |
| H23C | -1106 | 2805 | -995  | 76 |
| H24A | -797  | 1113 | 77    | 69 |
| H24B | -77   | 723  | -565  | 69 |
| H24C | -1036 | 1217 | -1380 | 69 |
| H25A | 4132  | -341 | 1338  | 54 |
| H25B | 3675  | -328 | -140  | 54 |

---

Table 6. Torsion angles [°] for nilwl05.

|                 |           |                     |            |
|-----------------|-----------|---------------------|------------|
| C5-N1-C1-O1     | 173.5(4)  | C5-N1-C8-C16        | -108.4(7)  |
| C8'-N1-C1-O1    | -3.9(6)   | N1-C8-C9-C10        | -52.9(10)  |
| C8-N1-C1-O1     | -1.7(7)   | C16-C8-C9-C10       | -177.0(7)  |
| C5-N1-C1-C2     | -8.0(6)   | C8-C9-C10-C15       | -53.4(14)  |
| C8'-N1-C1-C2    | 174.6(4)  | C8-C9-C10-C11       | 131.8(11)  |
| C8-N1-C1-C2     | 176.8(4)  | C15-C10-C11-C12     | -1(2)      |
| O1-C1-C2-C6     | 1.0(6)    | C9-C10-C11-C12      | 174.5(14)  |
| N1-C1-C2-C6     | -177.5(4) | C10-C11-C12-C13     | -2(3)      |
| O1-C1-C2-C3     | -178.9(4) | C11-C12-C13-C14     | 7(2)       |
| N1-C1-C2-C3     | 2.7(6)    | C12-C13-C14-C15     | -7.9(19)   |
| C6-C2-C3-C3#1   | 0.2(7)    | C11-C10-C15-C14     | -0.9(17)   |
| C1-C2-C3-C3#1   | -180.0(4) | C9-C10-C15-C14      | -175.7(10) |
| C6-C2-C3-C4     | -178.9(4) | C13-C14-C15-C10     | 5.2(17)    |
| C1-C2-C3-C4     | 0.9(6)    | C1-N1-C8'-C9'       | -134.2(6)  |
| C3#1-C3-C4-C7#1 | 0.6(7)    | C5-N1-C8'-C9'       | 48.5(8)    |
| C2-C3-C4-C7#1   | 179.7(4)  | C1-N1-C8'-C16       | 99.2(7)    |
| C3#1-C3-C4-C5   | -178.8(4) | C5-N1-C8'-C16       | -78.1(8)   |
| C2-C3-C4-C5     | 0.3(6)    | N1-C8'-C9'-C10'     | 57.4(10)   |
| C1-N1-C5-O2     | -171.0(4) | C16-C8'-C9'-C10'    | -176.9(7)  |
| C8'-N1-C5-O2    | 5.8(7)    | C8'-C9'-C10'-C15'   | -120.6(12) |
| C8-N1-C5-O2     | 5.0(6)    | C8'-C9'-C10'-C11'   | 61.7(13)   |
| C1-N1-C5-C4     | 9.1(6)    | C15'-C10'-C11'-C12' | -1(2)      |
| C8'-N1-C5-C4    | -174.1(5) | C9'-C10'-C11'-C12'  | 176.5(14)  |
| C8-N1-C5-C4     | -174.9(4) | C10'-C11'-C12'-C13' | 4(2)       |
| C7#1-C4-C5-O2   | -4.3(6)   | C11'-C12'-C13'-C14' | -6(2)      |
| C3-C4-C5-O2     | 175.1(4)  | C12'-C13'-C14'-C15' | 5.5(19)    |
| C7#1-C4-C5-N1   | 175.5(4)  | C11'-C10'-C15'-C14' | 1.0(18)    |
| C3-C4-C5-N1     | -5.1(5)   | C9'-C10'-C15'-C14'  | -176.8(10) |
| C3-C2-C6-C7     | -1.5(6)   | C13'-C14'-C15'-C10' | -3.3(17)   |
| C1-C2-C6-C7     | 178.6(4)  | C17-N2-C16-O3       | 2.8(6)     |
| C2-C6-C7-C4#1   | 1.8(6)    | C17-N2-C16-C8'      | -167.4(6)  |
| C1-N1-C8-C9     | -55.4(8)  | C17-N2-C16-C8       | 170.3(6)   |
| C5-N1-C8-C9     | 128.7(7)  | C9'-C8'-C16-O3      | 55.4(9)    |
| C1-N1-C8-C16    | 67.4(9)   | N1-C8'-C16-O3       | 178.3(6)   |

|                |           |
|----------------|-----------|
| C9'-C8'-C16-N2 | -133.5(6) |
| N1-C8'-C16-N2  | -10.7(10) |
| N1-C8-C16-O3   | -161.5(5) |
| C9-C8-C16-O3   | -37.4(9)  |
| N1-C8-C16-N2   | 30.2(9)   |
| C9-C8-C16-N2   | 154.4(6)  |
| C16-N2-C17-C18 | 99.1(5)   |
| N2-C17-C18-C19 | 51.2(5)   |
| C20-N3-C19-C18 | -102.4(5) |
| C17-C18-C19-N3 | 58.4(5)   |
| C19-N3-C20-O4  | 6.2(6)    |
| C19-N3-C20-O5  | -173.4(3) |
| C21-O5-C20-O4  | 3.5(6)    |
| C21-O5-C20-N3  | -176.8(3) |
| C20-O5-C21-C22 | 62.0(5)   |
| C20-O5-C21-C24 | 179.7(3)  |
| C20-O5-C21-C23 | -62.5(4)  |

---

Symmetry transformations used to generate equivalent atoms:

#1 -x,-y+1,-z

Table 7. Hydrogen bonds and close contacts for nilwl05 [ $\text{\AA}$  and  $^\circ$ ].

| D-H...A      | d(D-H)  | d(H...A) | d(D...A) | <(DHA) |
|--------------|---------|----------|----------|--------|
| N2-H2...O4   | 0.88(4) | 2.04(4)  | 2.867(4) | 156(4) |
| N3-H3...O2#2 | 0.86(4) | 2.09(4)  | 2.907(5) | 159(4) |

Symmetry transformations used to generate equivalent atoms:

#1 -x,-y+1,-z #2 x,-y+1/2,z+1/2

**Appendix 3. Crystal Structure Report for 3b**

REFERENCE NUMBER: nilwl04

## CRYSTAL STRUCTURE REPORT

 $C_{52}H_{52}F_{10}N_6O_{12}$ 

or

 $C_{48}H_{44}F_{10}N_6O_{10} \cdot$  ethyl acetate solvate

Report prepared for:

W. Liyanage, Prof. B. Nilsson

December 26, 2011

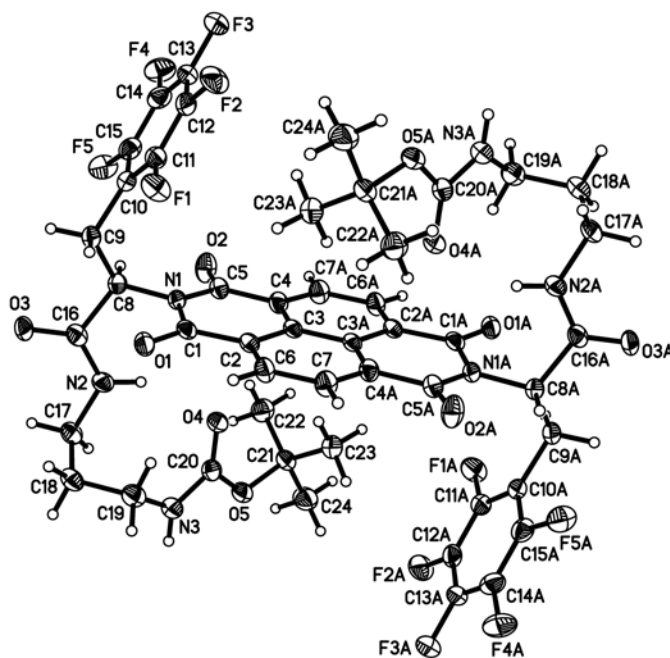

William W. Brennessel

X-ray Crystallographic Facility

Department of Chemistry, University of Rochester

120 Trustee Road

Rochester, NY 14627

### Data collection

A crystal (0.32 x 0.16 x 0.08 mm<sup>3</sup>) was placed onto the tip of a 0.1 mm diameter glass capillary tube or fiber and mounted on a Bruker SMART APEX II CCD Platform diffractometer for a data collection at 100.0(5) K.<sup>1</sup> A preliminary set of cell constants and an orientation matrix were calculated from reflections harvested from three orthogonal wedges of reciprocal space. The full data collection was carried out using MoK $\alpha$  radiation (graphite monochromator) with a frame time of 90 seconds and a detector distance of 4.01 cm. A randomly oriented region of reciprocal space was surveyed: six major sections of frames were collected with 0.50° steps in  $\omega$  at six different  $\phi$  settings and a detector position of -38° in  $2\theta$ . The intensity data were corrected for absorption.<sup>2</sup> Final cell constants were calculated from the xyz centroids of 4083 strong reflections from the actual data collection after integration.<sup>3</sup> See Table 1 for additional crystal and refinement information.

### Structure solution and refinement

The structure was solved using SIR97<sup>4</sup> and refined using SHELXL-97.<sup>5</sup> The space group  $P2_1/n$  was determined based on systematic absences. A direct-methods solution was calculated which provided most non-hydrogen atoms from the E-map. Full-matrix least squares / difference Fourier cycles were performed which located the remaining non-hydrogen atoms. All non-hydrogen atoms were refined with anisotropic displacement parameters. The amine hydrogen atoms were found from the difference Fourier map, and their positional and isotropic displacement parameters were refined independently from those of their respective bonded nitrogen atoms. All other hydrogen atoms were placed in ideal positions and refined as riding atoms with relative isotropic displacement parameters. The final full matrix least squares refinement converged to  $R1 = 0.0476$  ( $F^2$ ,  $I > 2\sigma(I)$ ) and  $wR2 = 0.1120$  ( $F^2$ , all data).

### Structure description

The structure is the one suggested. The featured molecule and the co-crystallized ethyl acetate solvent molecule lie in crystallographic inversion centers; the latter is modeled as disordered over the center (50:50). Intramolecular and intermolecular hydrogen bonding are present (see diagram and Table 7). The intermolecular hydrogen bonding links molecules in one direction, while pi-stacking (~3.2 Å) links molecules in a second (orthogonal) direction (see diagrams).

Unless noted otherwise all structural diagrams containing thermal displacement ellipsoids are drawn at the 50 % probability level.

Data collection, structure solution, and structure refinement were conducted at the X-ray Crystallographic Facility, B51 Hutchison Hall, Department of Chemistry, University of Rochester. All publications arising from this report MUST either 1) include William W. Brennessel as a coauthor or 2) acknowledge William W. Brennessel and the X-ray Crystallographic Facility of the Department of Chemistry at the University of Rochester.



- 
- <sup>1</sup> *APEX2*, version 2011.4-1; Bruker AXS: Madison, WI, 2011.
- <sup>2</sup> Sheldrick, G. M. *SADABS*, version 2008/1; University of Göttingen: Göttingen, Germany, 2008.
- <sup>3</sup> *SAINTE*, version 7.68A; Bruker AXS: Madison, WI, 2009.
- <sup>4</sup> Altomare, A.; Burla, M. C.; Camalli, M.; Cascarano, G. L.; Giacovazzo, C.; Guagliardi, A.; Moliterni, A. G. G.; Polidori, G.; Spagna, R. *SIR97: A new program for solving and refining crystal structures*; Istituto di Cristallografia, CNR: Bari, Italy, 1999.
- <sup>5</sup> Sheldrick, G. M. *Acta. Cryst.* **2008**, *A64*, 112-122.

Some equations of interest:

$$R_{\text{int}} = \frac{\sum |F_o^2 - \langle F_o^2 \rangle|}{\sum F_o^2}$$

$$R1 = \frac{\sum ||F_o| - |F_c||}{\sum |F_o|}$$

$$wR2 = [\frac{\sum [w(F_o^2 - F_c^2)^2]}{\sum [w(F_o^2)^2]}]^{1/2}$$

where  $w = 1 / [\sigma^2 (F_o^2) + (aP)^2 + bP]$  and

$$P = 1/3 \max (0, F_o^2) + 2/3 F_c^2$$

$$\text{GOF} = S = [\frac{\sum [w(F_o^2 - F_c^2)^2]}{(m-n)}]^{1/2}$$

where  $m$  = number of reflections and  $n$  = number of parameters

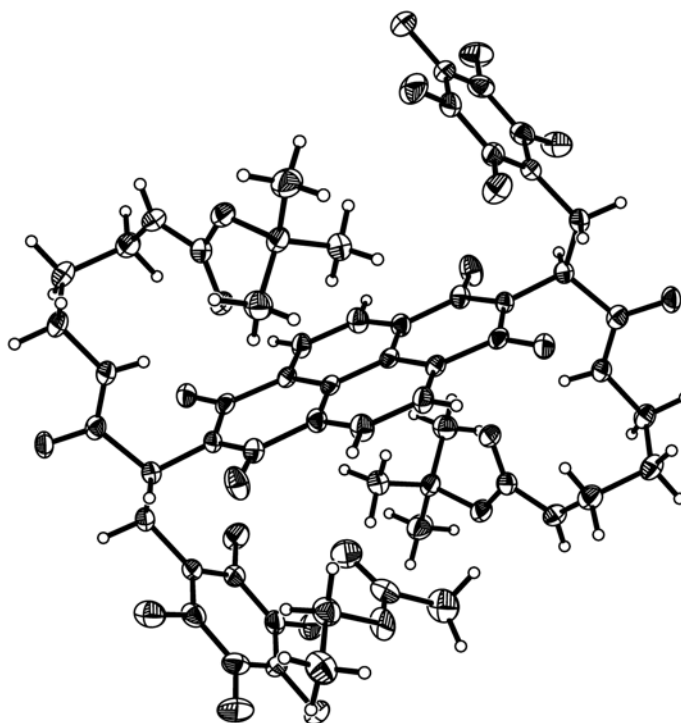

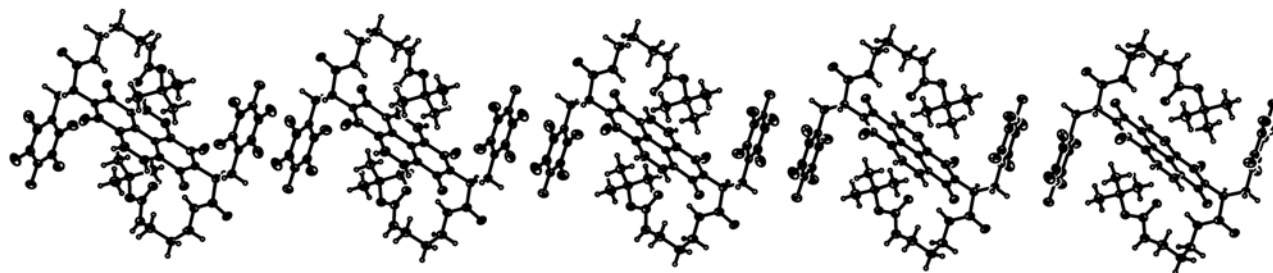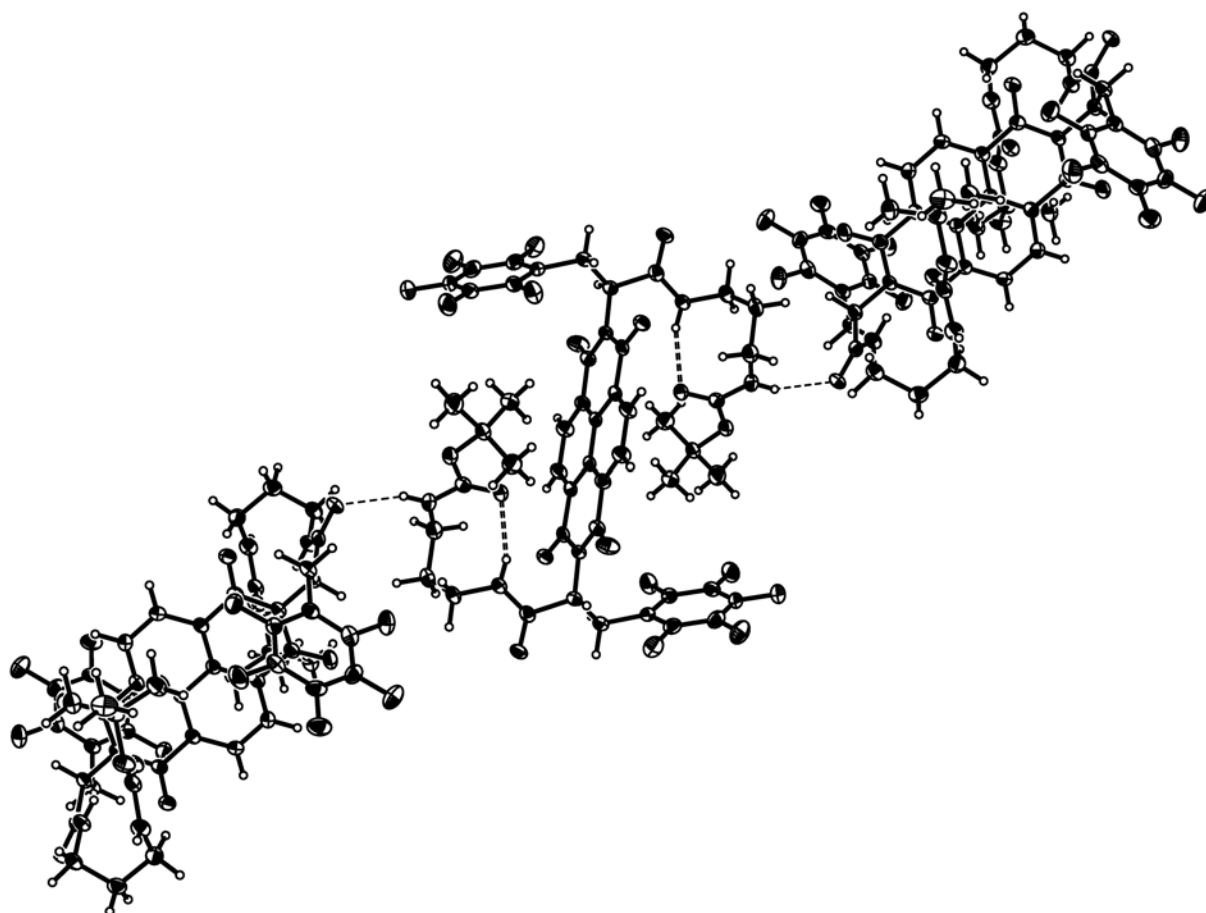

Table 1. Crystal data and structure refinement for nilwl04.

|                                                     |                                                                                |                            |
|-----------------------------------------------------|--------------------------------------------------------------------------------|----------------------------|
| Identification code                                 | nilwl04                                                                        |                            |
| Empirical formula                                   | C <sub>52</sub> H <sub>52</sub> F <sub>10</sub> N <sub>6</sub> O <sub>12</sub> |                            |
| Formula weight                                      | 1143.00                                                                        |                            |
| Temperature                                         | 100.0(5) K                                                                     |                            |
| Wavelength                                          | 0.71073 Å                                                                      |                            |
| Crystal system                                      | Monoclinic                                                                     |                            |
| Space group                                         | <i>P</i> 2 <sub>1</sub> / <i>n</i>                                             |                            |
| Unit cell dimensions                                | <i>a</i> = 10.637(2) Å                                                         | $\alpha = 90^\circ$        |
|                                                     | <i>b</i> = 11.266(2) Å                                                         | $\beta = 103.619(4)^\circ$ |
|                                                     | <i>c</i> = 21.887(5) Å                                                         | $\gamma = 90^\circ$        |
| Volume                                              | 2549.0(9) Å <sup>3</sup>                                                       |                            |
| <i>Z</i>                                            | 2                                                                              |                            |
| Density (calculated)                                | 1.489 Mg/m <sup>3</sup>                                                        |                            |
| Absorption coefficient                              | 0.130 mm <sup>-1</sup>                                                         |                            |
| <i>F</i> (000)                                      | 1184                                                                           |                            |
| Crystal color, morphology                           | colorless, needle                                                              |                            |
| Crystal size                                        | 0.32 x 0.16 x 0.08 mm <sup>3</sup>                                             |                            |
| Theta range for data collection                     | 1.91 to 28.28°                                                                 |                            |
| Index ranges                                        | -14 ≤ <i>h</i> ≤ 14, -15 ≤ <i>k</i> ≤ 15, -29 ≤ <i>l</i> ≤ 29                  |                            |
| Reflections collected                               | 47284                                                                          |                            |
| Independent reflections                             | 6316 [ <i>R</i> (int) = 0.1051]                                                |                            |
| Observed reflections                                | 3828                                                                           |                            |
| Completeness to theta = 28.28°                      | 100.0%                                                                         |                            |
| Absorption correction                               | Multi-scan                                                                     |                            |
| Max. and min. transmission                          | 0.9897 and 0.9597                                                              |                            |
| Refinement method                                   | Full-matrix least-squares on <i>F</i> <sup>2</sup>                             |                            |
| Data / restraints / parameters                      | 6316 / 0 / 401                                                                 |                            |
| Goodness-of-fit on <i>F</i> <sup>2</sup>            | 1.010                                                                          |                            |
| Final <i>R</i> indices [ <i>I</i> > 2σ( <i>I</i> )] | <i>R</i> 1 = 0.0476, <i>wR</i> 2 = 0.0941                                      |                            |
| <i>R</i> indices (all data)                         | <i>R</i> 1 = 0.0972, <i>wR</i> 2 = 0.1120                                      |                            |
| Largest diff. peak and hole                         | 0.331 and -0.220 e.Å <sup>-3</sup>                                             |                            |

Table 2. Atomic coordinates ( $\times 10^4$ ) and equivalent isotropic displacement parameters ( $\text{\AA}^2 \times 10^3$ ) for nilwl04.  $U_{\text{eq}}$  is defined as one third of the trace of the orthogonalized  $U_{ij}$  tensor.

|     | x        | y        | z       | $U_{\text{eq}}$ |
|-----|----------|----------|---------|-----------------|
| F1  | 5296(1)  | 2970(1)  | 4305(1) | 37(1)           |
| F2  | 5727(1)  | 1244(1)  | 3542(1) | 41(1)           |
| F3  | 6726(1)  | -868(1)  | 4022(1) | 39(1)           |
| F4  | 7196(1)  | -1257(1) | 5285(1) | 42(1)           |
| F5  | 6687(1)  | 449(1)   | 6054(1) | 37(1)           |
| O1  | 6377(1)  | 5249(1)  | 5438(1) | 26(1)           |
| O2  | 9281(2)  | 2362(1)  | 6226(1) | 35(1)           |
| O3  | 5452(1)  | 3843(1)  | 6758(1) | 28(1)           |
| O4  | 9627(1)  | 5738(1)  | 6537(1) | 28(1)           |
| O5  | 11215(1) | 6653(1)  | 7270(1) | 30(1)           |
| N1  | 7785(2)  | 3748(1)  | 5787(1) | 21(1)           |
| N2  | 7412(2)  | 4743(2)  | 6893(1) | 26(1)           |
| N3  | 9188(2)  | 7272(2)  | 7130(1) | 29(1)           |
| C1  | 7414(2)  | 4795(2)  | 5442(1) | 21(1)           |
| C2  | 8336(2)  | 5285(2)  | 5095(1) | 20(1)           |
| C3  | 9556(2)  | 4755(2)  | 5161(1) | 20(1)           |
| C4  | 9929(2)  | 3749(2)  | 5548(1) | 23(1)           |
| C5  | 9013(2)  | 3219(2)  | 5882(1) | 24(1)           |
| C6  | 7996(2)  | 6255(2)  | 4714(1) | 26(1)           |
| C7  | 8865(2)  | 6735(2)  | 4388(1) | 28(1)           |
| C8  | 6846(2)  | 3208(2)  | 6101(1) | 23(1)           |
| C9  | 5654(2)  | 2727(2)  | 5636(1) | 25(1)           |
| C10 | 5987(2)  | 1782(2)  | 5210(1) | 24(1)           |
| C11 | 5769(2)  | 1934(2)  | 4568(1) | 25(1)           |
| C12 | 5995(2)  | 1058(2)  | 4167(1) | 28(1)           |
| C13 | 6491(2)  | -9(2)    | 4408(1) | 28(1)           |
| C14 | 6735(2)  | -205(2)  | 5045(1) | 30(1)           |
| C15 | 6479(2)  | 683(2)   | 5433(1) | 28(1)           |
| C16 | 6485(2)  | 4003(2)  | 6604(1) | 24(1)           |
| C17 | 7283(2)  | 5524(2)  | 7404(1) | 28(1)           |
| C18 | 6909(2)  | 6789(2)  | 7183(1) | 30(1)           |

|     |           |          |         |       |
|-----|-----------|----------|---------|-------|
| C19 | 7820(2)   | 7348(2)  | 6818(1) | 30(1) |
| C20 | 9986(2)   | 6491(2)  | 6946(1) | 26(1) |
| C21 | 12268(2)  | 5891(2)  | 7148(1) | 28(1) |
| C22 | 12027(2)  | 4599(2)  | 7281(1) | 34(1) |
| C23 | 12417(2)  | 6086(2)  | 6483(1) | 35(1) |
| C24 | 13450(2)  | 6355(2)  | 7624(1) | 41(1) |
| O6  | 9033(3)   | 1600(3)  | 4765(2) | 39(1) |
| O7  | 10124(14) | -61(13)  | 4925(5) | 36(2) |
| C25 | 9774(6)   | 705(6)   | 3923(3) | 45(1) |
| C26 | 9590(5)   | 805(4)   | 4580(2) | 31(1) |
| C27 | 10095(5)  | -49(5)   | 5599(2) | 34(1) |
| C28 | 10464(6)  | -1252(5) | 5881(3) | 42(1) |

---

Table 3. Bond lengths [Å] and angles [°] for nilwl04.

|             |          |              |           |
|-------------|----------|--------------|-----------|
| F(1)-C(11)  | 1.346(2) | C(9)-C(10)   | 1.510(3)  |
| F(2)-C(12)  | 1.346(2) | C(9)-H(9A)   | 0.9900    |
| F(3)-C(13)  | 1.347(2) | C(9)-H(9B)   | 0.9900    |
| F(4)-C(14)  | 1.341(2) | C(10)-C(11)  | 1.380(3)  |
| F(5)-C(15)  | 1.352(2) | C(10)-C(15)  | 1.387(3)  |
| O(1)-C(1)   | 1.214(2) | C(11)-C(12)  | 1.379(3)  |
| O(2)-C(5)   | 1.215(2) | C(12)-C(13)  | 1.368(3)  |
| O(3)-C(16)  | 1.235(2) | C(13)-C(14)  | 1.373(3)  |
| O(4)-C(20)  | 1.227(2) | C(14)-C(15)  | 1.381(3)  |
| O(5)-C(20)  | 1.344(3) | C(17)-C(18)  | 1.526(3)  |
| O(5)-C(21)  | 1.484(3) | C(17)-H(17A) | 0.9900    |
| N(1)-C(1)   | 1.405(2) | C(17)-H(17B) | 0.9900    |
| N(1)-C(5)   | 1.406(3) | C(18)-C(19)  | 1.530(3)  |
| N(1)-C(8)   | 1.471(2) | C(18)-H(18A) | 0.9900    |
| N(2)-C(16)  | 1.332(3) | C(18)-H(18B) | 0.9900    |
| N(2)-C(17)  | 1.454(3) | C(19)-H(19A) | 0.9900    |
| N(2)-H(2)   | 0.85(2)  | C(19)-H(19B) | 0.9900    |
| N(3)-C(20)  | 1.349(3) | C(21)-C(23)  | 1.516(3)  |
| N(3)-C(19)  | 1.456(3) | C(21)-C(22)  | 1.518(3)  |
| N(3)-H(3)   | 0.86(3)  | C(21)-C(24)  | 1.523(3)  |
| C(1)-C(2)   | 1.481(3) | C(22)-H(22A) | 0.9800    |
| C(2)-C(6)   | 1.372(3) | C(22)-H(22B) | 0.9800    |
| C(2)-C(3)   | 1.405(3) | C(22)-H(22C) | 0.9800    |
| C(3)-C(4)   | 1.414(3) | C(23)-H(23A) | 0.9800    |
| C(3)-C(3)#1 | 1.417(4) | C(23)-H(23B) | 0.9800    |
| C(4)-C(7)#1 | 1.370(3) | C(23)-H(23C) | 0.9800    |
| C(4)-C(5)   | 1.477(3) | C(24)-H(24A) | 0.9800    |
| C(6)-C(7)   | 1.402(3) | C(24)-H(24B) | 0.9800    |
| C(6)-H(6A)  | 0.9500   | C(24)-H(24C) | 0.9800    |
| C(7)-C(4)#1 | 1.370(3) | O(6)-C(26)   | 1.195(6)  |
| C(7)-H(7A)  | 0.9500   | O(7)-C(26)   | 1.282(16) |
| C(8)-C(9)   | 1.526(3) | O(7)-C(27)   | 1.483(8)  |
| C(8)-C(16)  | 1.538(3) | C(25)-C(26)  | 1.502(7)  |
| C(8)-H(8A)  | 1.0000   | C(25)-H(25A) | 0.9800    |

|                  |            |                   |            |
|------------------|------------|-------------------|------------|
| C(25)-H(25B)     | 0.9800     | C(4)#1-C(7)-C(6)  | 120.47(19) |
| C(25)-H(25C)     | 0.9800     | C(4)#1-C(7)-H(7A) | 119.8      |
| C(27)-C(28)      | 1.502(8)   | C(6)-C(7)-H(7A)   | 119.8      |
| C(27)-H(27A)     | 0.9900     | N(1)-C(8)-C(9)    | 112.57(16) |
| C(27)-H(27B)     | 0.9900     | N(1)-C(8)-C(16)   | 113.93(16) |
| C(28)-H(28A)     | 0.9800     | C(9)-C(8)-C(16)   | 112.14(17) |
| C(28)-H(28B)     | 0.9800     | N(1)-C(8)-H(8A)   | 105.8      |
| C(28)-H(28C)     | 0.9800     | C(9)-C(8)-H(8A)   | 105.8      |
| C(20)-O(5)-C(21) | 120.53(16) | C(16)-C(8)-H(8A)  | 105.8      |
| C(1)-N(1)-C(5)   | 124.71(16) | C(10)-C(9)-C(8)   | 112.54(17) |
| C(1)-N(1)-C(8)   | 117.56(16) | C(10)-C(9)-H(9A)  | 109.1      |
| C(5)-N(1)-C(8)   | 117.63(16) | C(8)-C(9)-H(9A)   | 109.1      |
| C(16)-N(2)-C(17) | 123.36(19) | C(10)-C(9)-H(9B)  | 109.1      |
| C(16)-N(2)-H(2)  | 121.7(15)  | C(8)-C(9)-H(9B)   | 109.1      |
| C(17)-N(2)-H(2)  | 114.6(15)  | H(9A)-C(9)-H(9B)  | 107.8      |
| C(20)-N(3)-C(19) | 121.87(18) | C(11)-C(10)-C(15) | 115.34(18) |
| C(20)-N(3)-H(3)  | 117.8(17)  | C(11)-C(10)-C(9)  | 122.19(18) |
| C(19)-N(3)-H(3)  | 120.4(17)  | C(15)-C(10)-C(9)  | 122.41(18) |
| O(1)-C(1)-N(1)   | 119.80(18) | F(1)-C(11)-C(12)  | 116.91(18) |
| O(1)-C(1)-C(2)   | 123.33(18) | F(1)-C(11)-C(10)  | 119.94(18) |
| N(1)-C(1)-C(2)   | 116.88(17) | C(12)-C(11)-C(10) | 123.14(19) |
| C(6)-C(2)-C(3)   | 120.40(18) | F(2)-C(12)-C(13)  | 119.98(19) |
| C(6)-C(2)-C(1)   | 119.86(18) | F(2)-C(12)-C(11)  | 120.55(19) |
| C(3)-C(2)-C(1)   | 119.75(17) | C(13)-C(12)-C(11) | 119.46(19) |
| C(2)-C(3)-C(4)   | 121.66(17) | F(3)-C(13)-C(12)  | 120.03(19) |
| C(2)-C(3)-C(3)#1 | 119.4(2)   | F(3)-C(13)-C(14)  | 120.16(19) |
| C(4)-C(3)-C(3)#1 | 118.9(2)   | C(12)-C(13)-C(14) | 119.80(19) |
| C(7)#1-C(4)-C(3) | 120.36(18) | F(4)-C(14)-C(13)  | 120.24(19) |
| C(7)#1-C(4)-C(5) | 119.93(18) | F(4)-C(14)-C(15)  | 120.4(2)   |
| C(3)-C(4)-C(5)   | 119.71(18) | C(13)-C(14)-C(15) | 119.30(19) |
| O(2)-C(5)-N(1)   | 120.26(18) | F(5)-C(15)-C(14)  | 117.91(19) |
| O(2)-C(5)-C(4)   | 122.80(19) | F(5)-C(15)-C(10)  | 119.13(19) |
| N(1)-C(5)-C(4)   | 116.94(17) | C(14)-C(15)-C(10) | 122.93(19) |
| C(2)-C(6)-C(7)   | 120.42(19) | O(3)-C(16)-N(2)   | 124.69(19) |
| C(2)-C(6)-H(6A)  | 119.8      | O(3)-C(16)-C(8)   | 119.89(18) |
| C(7)-C(6)-H(6A)  | 119.8      | N(2)-C(16)-C(8)   | 115.00(18) |

|                     |            |                     |          |
|---------------------|------------|---------------------|----------|
| N(2)-C(17)-C(18)    | 112.78(16) | C(21)-C(22)-H(22B)  | 109.5    |
| N(2)-C(17)-H(17A)   | 109.0      | H(22A)-C(22)-H(22B) | 109.5    |
| C(18)-C(17)-H(17A)  | 109.0      | C(21)-C(22)-H(22C)  | 109.5    |
| N(2)-C(17)-H(17B)   | 109.0      | H(22A)-C(22)-H(22C) | 109.5    |
| C(18)-C(17)-H(17B)  | 109.0      | H(22B)-C(22)-H(22C) | 109.5    |
| H(17A)-C(17)-H(17B) | 107.8      | C(21)-C(23)-H(23A)  | 109.5    |
| C(17)-C(18)-C(19)   | 113.52(18) | C(21)-C(23)-H(23B)  | 109.5    |
| C(17)-C(18)-H(18A)  | 108.9      | H(23A)-C(23)-H(23B) | 109.5    |
| C(19)-C(18)-H(18A)  | 108.9      | C(21)-C(23)-H(23C)  | 109.5    |
| C(17)-C(18)-H(18B)  | 108.9      | H(23A)-C(23)-H(23C) | 109.5    |
| C(19)-C(18)-H(18B)  | 108.9      | H(23B)-C(23)-H(23C) | 109.5    |
| H(18A)-C(18)-H(18B) | 107.7      | C(21)-C(24)-H(24A)  | 109.5    |
| N(3)-C(19)-C(18)    | 114.65(18) | C(21)-C(24)-H(24B)  | 109.5    |
| N(3)-C(19)-H(19A)   | 108.6      | H(24A)-C(24)-H(24B) | 109.5    |
| C(18)-C(19)-H(19A)  | 108.6      | C(21)-C(24)-H(24C)  | 109.5    |
| N(3)-C(19)-H(19B)   | 108.6      | H(24A)-C(24)-H(24C) | 109.5    |
| C(18)-C(19)-H(19B)  | 108.6      | H(24B)-C(24)-H(24C) | 109.5    |
| H(19A)-C(19)-H(19B) | 107.6      | C(26)-O(7)-C(27)    | 117.9(8) |
| O(4)-C(20)-O(5)     | 125.12(19) | O(6)-C(26)-O(7)     | 124.0(5) |
| O(4)-C(20)-N(3)     | 124.0(2)   | O(6)-C(26)-C(25)    | 124.5(5) |
| O(5)-C(20)-N(3)     | 110.88(18) | O(7)-C(26)-C(25)    | 111.5(5) |
| O(5)-C(21)-C(23)    | 110.04(18) | O(7)-C(27)-C(28)    | 109.6(7) |
| O(5)-C(21)-C(22)    | 110.55(17) | O(7)-C(27)-H(27A)   | 109.8    |
| C(23)-C(21)-C(22)   | 112.57(17) | C(28)-C(27)-H(27A)  | 109.8    |
| O(5)-C(21)-C(24)    | 102.44(16) | O(7)-C(27)-H(27B)   | 109.8    |
| C(23)-C(21)-C(24)   | 110.50(19) | C(28)-C(27)-H(27B)  | 109.8    |
| C(22)-C(21)-C(24)   | 110.29(19) | H(27A)-C(27)-H(27B) | 108.2    |
| C(21)-C(22)-H(22A)  | 109.5      |                     |          |

---

Symmetry transformations used to generate equivalent atoms:

#1 -x+2,-y+1,-z+1



Table 4. Anisotropic displacement parameters ( $\text{\AA}^2 \times 10^3$ ) for nilwl04. The anisotropic displacement factor exponent takes the form:  $-2\pi^2 [h^2 a^{*2} U_{11} + \dots + 2 h k a^* b^* U_{12}]$

|     | $U_{11}$ | $U_{22}$ | $U_{33}$ | $U_{23}$ | $U_{13}$ | $U_{12}$ |
|-----|----------|----------|----------|----------|----------|----------|
| F1  | 51(1)    | 30(1)    | 30(1)    | 5(1)     | 13(1)    | 10(1)    |
| F2  | 61(1)    | 41(1)    | 24(1)    | -2(1)    | 18(1)    | -3(1)    |
| F3  | 43(1)    | 31(1)    | 48(1)    | -14(1)   | 21(1)    | -2(1)    |
| F4  | 46(1)    | 23(1)    | 52(1)    | 3(1)     | 3(1)     | 4(1)     |
| F5  | 51(1)    | 32(1)    | 25(1)    | 5(1)     | 3(1)     | -6(1)    |
| O1  | 25(1)    | 28(1)    | 28(1)    | -1(1)    | 11(1)    | 1(1)     |
| O2  | 34(1)    | 40(1)    | 34(1)    | 18(1)    | 13(1)    | 5(1)     |
| O3  | 29(1)    | 34(1)    | 24(1)    | 1(1)     | 14(1)    | -1(1)    |
| O4  | 31(1)    | 31(1)    | 22(1)    | -8(1)    | 9(1)     | -5(1)    |
| O5  | 28(1)    | 34(1)    | 31(1)    | -11(1)   | 10(1)    | -5(1)    |
| N1  | 23(1)    | 23(1)    | 18(1)    | -1(1)    | 8(1)     | -3(1)    |
| N2  | 29(1)    | 30(1)    | 20(1)    | -4(1)    | 11(1)    | -4(1)    |
| N3  | 34(1)    | 28(1)    | 26(1)    | -8(1)    | 10(1)    | -4(1)    |
| C1  | 24(1)    | 24(1)    | 16(1)    | -5(1)    | 6(1)     | 0(1)     |
| C2  | 24(1)    | 23(1)    | 15(1)    | -3(1)    | 6(1)     | -1(1)    |
| C3  | 24(1)    | 21(1)    | 14(1)    | -3(1)    | 6(1)     | -1(1)    |
| C4  | 25(1)    | 27(1)    | 19(1)    | 1(1)     | 8(1)     | -1(1)    |
| C5  | 24(1)    | 27(1)    | 20(1)    | 1(1)     | 7(1)     | 1(1)     |
| C6  | 24(1)    | 28(1)    | 29(1)    | 2(1)     | 11(1)    | 5(1)     |
| C7  | 30(1)    | 28(1)    | 27(1)    | 7(1)     | 9(1)     | 4(1)     |
| C8  | 27(1)    | 24(1)    | 21(1)    | 0(1)     | 11(1)    | -3(1)    |
| C9  | 26(1)    | 29(1)    | 24(1)    | -1(1)    | 11(1)    | -3(1)    |
| C10 | 22(1)    | 24(1)    | 26(1)    | -3(1)    | 9(1)     | -5(1)    |
| C11 | 27(1)    | 23(1)    | 27(1)    | 1(1)     | 9(1)     | 0(1)     |
| C12 | 31(1)    | 33(1)    | 23(1)    | -2(1)    | 12(1)    | -6(1)    |
| C13 | 27(1)    | 25(1)    | 36(1)    | -10(1)   | 14(1)    | -3(1)    |
| C14 | 29(1)    | 20(1)    | 40(1)    | 2(1)     | 6(1)     | 0(1)     |
| C15 | 29(1)    | 31(1)    | 23(1)    | 0(1)     | 4(1)     | -8(1)    |
| C16 | 32(1)    | 25(1)    | 16(1)    | 4(1)     | 8(1)     | 3(1)     |
| C17 | 34(1)    | 33(1)    | 17(1)    | -4(1)    | 10(1)    | -1(1)    |
| C18 | 33(1)    | 33(1)    | 24(1)    | -6(1)    | 9(1)     | 3(1)     |

|     |       |       |       |        |       |       |
|-----|-------|-------|-------|--------|-------|-------|
| C19 | 36(1) | 27(1) | 27(1) | 0(1)   | 9(1)  | 2(1)  |
| C20 | 31(1) | 27(1) | 23(1) | -1(1)  | 11(1) | -3(1) |
| C21 | 28(1) | 31(1) | 26(1) | -7(1)  | 10(1) | -1(1) |
| C22 | 38(1) | 34(1) | 29(1) | 3(1)   | 8(1)  | -2(1) |
| C23 | 39(1) | 34(1) | 36(1) | -3(1)  | 18(1) | -6(1) |
| C24 | 33(1) | 46(1) | 43(1) | -15(1) | 8(1)  | -5(1) |
| O6  | 42(2) | 34(2) | 41(2) | 4(2)   | 7(2)  | 4(2)  |
| O7  | 52(5) | 47(3) | 12(5) | 10(3)  | 13(2) | -4(3) |
| C25 | 56(4) | 50(4) | 29(3) | 11(3)  | 7(3)  | 2(3)  |
| C26 | 30(3) | 27(2) | 32(3) | 6(2)   | 2(2)  | -6(2) |
| C27 | 32(3) | 38(3) | 33(3) | -2(2)  | 7(2)  | -6(2) |
| C28 | 41(3) | 46(4) | 39(4) | 5(3)   | 8(3)  | -5(3) |

---

Table 5. Hydrogen coordinates ( $\times 10^4$ ) and isotropic displacement parameters ( $\text{\AA}^2 \times 10^3$ ) for nilwl04.

|      | x        | y        | z        | U(eq) |
|------|----------|----------|----------|-------|
| H2   | 8100(20) | 4846(19) | 6763(10) | 28(6) |
| H3   | 9510(20) | 7730(20) | 7439(12) | 42(7) |
| H6A  | 7167     | 6605     | 4670     | 31    |
| H7A  | 8615     | 7400     | 4120     | 33    |
| H8A  | 7290     | 2500     | 6330     | 28    |
| H9A  | 5050     | 2390     | 5872     | 30    |
| H9B  | 5207     | 3389     | 5375     | 30    |
| H17A | 8113     | 5543     | 7723     | 33    |
| H17B | 6616     | 5199     | 7606     | 33    |
| H18A | 6901     | 7288     | 7555     | 35    |
| H18B | 6021     | 6782     | 6913     | 35    |
| H19A | 7683     | 6954     | 6404     | 36    |
| H19B | 7586     | 8195     | 6743     | 36    |
| H22A | 11269    | 4311     | 6971     | 50    |
| H22B | 11871    | 4528     | 7704     | 50    |
| H22C | 12785    | 4125     | 7256     | 50    |
| H23A | 11638    | 5808     | 6183     | 52    |
| H23B | 13170    | 5643     | 6421     | 52    |
| H23C | 12540    | 6934     | 6416     | 52    |
| H24A | 13305    | 6288     | 8048     | 61    |
| H24B | 13595    | 7189     | 7533     | 61    |
| H24C | 14210    | 5885     | 7596     | 61    |
| H25A | 8970     | 928      | 3622     | 68    |
| H25B | 9999     | -114     | 3843     | 68    |
| H25C | 10472    | 1237     | 3873     | 68    |
| H27A | 9216     | 161      | 5642     | 41    |
| H27B | 10707    | 556      | 5825     | 41    |
| H28A | 10515    | -1225    | 6333     | 63    |
| H28B | 11308    | -1481    | 5810     | 63    |
| H28C | 9811     | -1835    | 5682     | 63    |

Table 6. Torsion angles [°] for nilwl04.

|                 |             |                 |             |
|-----------------|-------------|-----------------|-------------|
| C5-N1-C1-O1     | -172.53(17) | C8-C9-C10-C15   | 66.7(3)     |
| C8-N1-C1-O1     | 3.7(3)      | C15-C10-C11-F1  | -179.78(18) |
| C5-N1-C1-C2     | 7.6(3)      | C9-C10-C11-F1   | 2.9(3)      |
| C8-N1-C1-C2     | -176.22(16) | C15-C10-C11-C12 | 1.2(3)      |
| O1-C1-C2-C6     | -4.6(3)     | C9-C10-C11-C12  | -176.1(2)   |
| N1-C1-C2-C6     | 175.32(17)  | F1-C11-C12-F2   | -1.2(3)     |
| O1-C1-C2-C3     | 175.30(18)  | C10-C11-C12-F2  | 177.93(19)  |
| N1-C1-C2-C3     | -4.8(3)     | F1-C11-C12-C13  | 179.19(19)  |
| C6-C2-C3-C4     | -179.50(19) | C10-C11-C12-C13 | -1.7(3)     |
| C1-C2-C3-C4     | 0.6(3)      | F2-C12-C13-F3   | 0.9(3)      |
| C6-C2-C3-C3#1   | 1.2(3)      | C11-C12-C13-F3  | -179.48(19) |
| C1-C2-C3-C3#1   | -178.6(2)   | F2-C12-C13-C14  | -178.49(19) |
| C2-C3-C4-C7#1   | -178.68(19) | C11-C12-C13-C14 | 1.2(3)      |
| C3#1-C3-C4-C7#1 | 0.6(3)      | F3-C13-C14-F4   | -0.7(3)     |
| C2-C3-C4-C5     | 1.3(3)      | C12-C13-C14-F4  | 178.61(19)  |
| C3#1-C3-C4-C5   | -179.4(2)   | F3-C13-C14-C15  | -179.50(19) |
| C1-N1-C5-O2     | 174.55(18)  | C12-C13-C14-C15 | -0.1(3)     |
| C8-N1-C5-O2     | -1.6(3)     | F4-C14-C15-F5   | -1.0(3)     |
| C1-N1-C5-C4     | -5.7(3)     | C13-C14-C15-F5  | 177.73(19)  |
| C8-N1-C5-C4     | 178.08(16)  | F4-C14-C15-C10  | -179.15(19) |
| C7#1-C4-C5-O2   | 0.7(3)      | C13-C14-C15-C10 | -0.4(3)     |
| C3-C4-C5-O2     | -179.24(19) | C11-C10-C15-F5  | -178.20(18) |
| C7#1-C4-C5-N1   | -179.00(18) | C9-C10-C15-F5   | -0.9(3)     |
| C3-C4-C5-N1     | 1.0(3)      | C11-C10-C15-C14 | -0.1(3)     |
| C3-C2-C6-C7     | -0.4(3)     | C9-C10-C15-C14  | 177.2(2)    |
| C1-C2-C6-C7     | 179.42(18)  | C17-N2-C16-O3   | -4.4(3)     |
| C2-C6-C7-C4#1   | -0.9(3)     | C17-N2-C16-C8   | -176.90(17) |
| C1-N1-C8-C9     | 66.8(2)     | N1-C8-C16-O3    | 157.14(17)  |
| C5-N1-C8-C9     | -116.68(19) | C9-C8-C16-O3    | 27.8(3)     |
| C1-N1-C8-C16    | -62.3(2)    | N1-C8-C16-N2    | -30.0(2)    |
| C5-N1-C8-C16    | 114.20(19)  | C9-C8-C16-N2    | -159.32(17) |
| N1-C8-C9-C10    | 60.0(2)     | C16-N2-C17-C18  | -98.4(2)    |
| C16-C8-C9-C10   | -170.01(16) | N2-C17-C18-C19  | -54.4(2)    |
| C8-C9-C10-C11   | -116.2(2)   | C20-N3-C19-C18  | 104.1(2)    |

|                |             |
|----------------|-------------|
| C17-C18-C19-N3 | -50.8(2)    |
| C21-O5-C20-O4  | -0.1(3)     |
| C21-O5-C20-N3  | 179.91(17)  |
| C19-N3-C20-O4  | -5.0(3)     |
| C19-N3-C20-O5  | 175.02(17)  |
| C20-O5-C21-C23 | 64.2(2)     |
| C20-O5-C21-C22 | -60.7(2)    |
| C20-O5-C21-C24 | -178.25(18) |
| C27-O7-C26-O6  | -2.6(16)    |
| C27-O7-C26-C25 | 176.3(8)    |
| C26-O7-C27-C28 | 166.2(9)    |

---

Symmetry transformations used to generate equivalent atoms:

#1  $-x+2, -y+1, -z+1$

Table 7. Hydrogen bonds and close contacts for nilwl04 [ $\text{\AA}$  and  $^\circ$ ].

---

| D-H...A      | d(D-H)  | d(H...A) | d(D...A) | $\angle$ (DHA) |
|--------------|---------|----------|----------|----------------|
| N2-H2...O4   | 0.85(2) | 2.07(2)  | 2.877(2) | 158(2)         |
| N3-H3...O3#2 | 0.86(3) | 2.15(3)  | 2.960(2) | 157(2)         |

---

Symmetry transformations used to generate equivalent atoms:

#1  $-x+2, -y+1, -z+1$  #2  $-x+3/2, y+1/2, -z+3/2$
